# Supplementary material for: The Role of ARHGAP9: Clinical Implication and Potential Function in Acute Myeloid Leukemia
Source: Research Square preprint supplement (doi:10.21203/rs.3.rs-131666/v1), 2020-12-22
Supplement: Supplementary file 1 [file 54da93a3bf4fbeeea6791a25.xlsx]

## Sheet: Table S1
Additional file 1: Table S1. Correlations between ARHGAP9 expression and gene mutations in AML from TCGA cohort
Gene mutation
Cohesion	STAG2	1	1	1
	RAD21	1	3	0.367
	SMC3	4	2	0.681
	SMC1A	3	3	1
Epigenetic modification	TET2	3	9	0.071
	SETD2	0	1	1
	DNMT3A	15	21	0.233
	IDH1	7	7	0.976
	IDH2	7	9	0.578
	ASXL1	0	2	0.245
	EZH2	0	2	0.245
	KDM6A	3	1	0.62
Transcription	CEBPA	3	10	0.042
	RUNX1	7	1	0.063
	BCOR	1	0	1
	BCORL1	1	0	1
	PHF6	3	1	0.62
	GATA2	1	1	1
	ETV6	1	1	1
	NPM1	19	19	0.929
	TP53	4	7	0.368
	WT1	8	2	0.098
	Total	48	42	0.37
Signal transduction	JAK2	0	1	0.497
	NOTCH2	0	1	0.497
	KRAS	4	3	1
	NRAS	3	4	1
	CBL	1	0	1
	KIT	3	4	1
	PTPN11	3	3	1
	CSF3R	0	1	0.497
	EGFR	2	0	0.497
	SH2B3	0	1	1
	Total	16	18	0.665

## Sheet: Table S2
Additional file 1: Table S2. The significantly different genes between ARHGAP9low and ARHGAP9high groups
genesymbol	log1.5FC	AveExpr	t	P.Value	adj.P.Val	B
RASL12	-12.3388	0.469794	-3.27324	0.00132274	0.0243819	-1.95117
SNORD114-3	-11.0925	0.954505	-2.94856	0.00370982	0.0475662	-2.89918
SNORD114-2	-10.8937	0.309016	-3.0551	0.002668	0.0386664	-2.59769
MEG8	-10.7178	0.443762	-3.10436	0.00228421	0.0350082	-2.45512
SNORD114-4	-10.6739	0.461326	-3.12457	0.00214204	0.0335282	-2.39603
SNORD113-3	-10.5678	1.05129	-3.07116	0.0025368	0.0373338	-2.55144
OGDHL	-9.89974	0.358516	-3.34309	0.00104874	0.0208986	-1.736
AL117190.1	-9.88295	0.562609	-3.01974	0.00297936	0.0413638	-2.69882
RNU6-1270P	-9.72512	0.218953	-3.18535	0.00176238	0.0294847	-2.21633
SNORD114-10	-9.59042	0.435696	-3.27204	0.00132799	0.0244494	-1.95483
CLDN10-AS1	-9.32951	0.910435	-3.25445	0.00140712	0.0253231	-2.00839
RNU6-642P	-9.11619	0.0696064	-3.1236	0.00214869	0.0335749	-2.39888
MT1IP	-9.04114	0.0142523	-3.34258	0.00105053	0.0209154	-1.73758
RNU6-211P	-8.97826	0.0319182	-3.31177	0.00116428	0.0223609	-1.83296
AC012354.1	-8.84573	0.219043	-2.95598	0.0036267	0.046926	-2.87851
AC092159.1	-8.80594	0.119274	-3.32488	0.00111455	0.0217082	-1.79248
FAM19A5	-8.55144	0.55177	-3.1013	0.00230642	0.035243	-2.46401
MEG3	-8.42208	12.0008	-3.07772	0.00248487	0.0368746	-2.53245
SIX3-AS1	-8.40993	0.303188	-3.50359	0.000606945	0.0147094	-1.22686
SLC51B	-8.37835	0.0924846	-3.21559	0.00159772	0.0275661	-2.1258
AL596442.2	-8.31722	0.0318425	-3.08717	0.00241189	0.0363193	-2.50509
RF02252	-8.26636	0.0954068	-3.46634	0.00069023	0.0159633	-1.34682
HRASLS5	-8.24635	0.574631	-4.12664	6.11256e-05	0.00348308	0.936131
AC073094.1	-8.14858	0.119478	-3.57045	0.000480652	0.0127976	-1.00882
NDST3	-7.99102	0.947955	-3.19445	0.00171127	0.0288926	-2.18918
UGT3A2	-7.98844	5.38184	-3.48711	0.000642562	0.0152951	-1.28008
GFRA3	-7.9325	0.215847	-4.09747	6.84669e-05	0.00372442	0.828466
PGBD5	-7.87771	0.187883	-4.15763	5.41541e-05	0.00325911	1.05116
OOSP1P2	-7.73287	0.0486906	-3.23419	0.00150371	0.0264234	-2.06977
TNFAIP8L3	-7.6398	0.349515	-3.37386	0.000945709	0.0194498	-1.63996
MRGPRF-AS1	-7.61621	0.305776	-3.70752	0.000294959	0.00942318	-0.55097
BX547991.1	-7.38352	0.417911	-3.78432	0.00022307	0.00785063	-0.288217
BRINP2	-7.34792	0.239016	-2.94636	0.0037348	0.0477312	-2.9053
OR8R1P	-7.22839	1.54369	-2.96222	0.00355805	0.0463311	-2.86107
GLUD1P8	-7.17021	3.24596	-3.69359	0.000310152	0.0097258	-0.598151
TRIM36-IT1	-7.16519	0.0352513	-3.37679	0.000936407	0.0193148	-1.63077
RF02250	-7.12877	0.726887	-3.47775	0.000663645	0.0155572	-1.31019
AC003986.2	-7.10083	0.0130984	-3.03153	0.002872	0.0404134	-2.66521
CHAT	-6.85975	0.0211354	-3.02703	0.00291251	0.0407836	-2.67804
RF02247	-6.85433	1.85897	-3.52984	0.00055404	0.0139545	-1.14167
RF02246	-6.68962	4.2155	-3.28089	0.00128977	0.0239778	-1.9278
ASTN1	-6.68561	0.0424512	-3.25409	0.00140881	0.0253452	-2.0095
AC106738.1	-6.6	0.0987728	-3.50981	0.000594002	0.0145456	-1.20673
GYG2-AS1	-6.57494	0.0749574	-3.10909	0.00225012	0.0346331	-2.4413
GABRE	-6.55472	4.78997	-3.4548	0.00071815	0.0163891	-1.38379
GYG2	-6.54638	0.969241	-4.05628	8.02776e-05	0.00410383	0.677519
AC007405.3	-6.48255	0.088108	-3.10469	0.00228179	0.0349965	-2.45415
CCDC75P1	-6.47174	0.174998	-4.59666	9.11329e-06	0.00102379	2.75193
NDFIP2	-6.43487	1.19663	-4.2002	4.58092e-05	0.00292932	1.21025
AC243585.1	-6.36984	0.0130661	-3.45509	0.000717428	0.0163862	-1.38285
CISTR	-6.32919	0.0290446	-3.82324	0.000193317	0.00714212	-0.153355
AL122019.1	-6.28048	0.294213	-3.25724	0.00139427	0.025207	-1.9999
TRIM60P19	-6.26693	0.0177547	-2.92449	0.00399197	0.0497499	-2.966
AC092978.1	-6.11885	0.040181	-2.95071	0.00368557	0.0473654	-2.8932
KLHL38	-6.09691	0.00672108	-2.99723	0.0031946	0.0431995	-2.76263
ANXA8	-6.07502	0.794914	-2.94415	0.00376008	0.0478578	-2.91145
AC012354.3	-6.0725	0.102364	-2.94758	0.00372095	0.0476729	-2.90191
HORMAD2	-6.06984	0.0268622	-3.40476	0.000851861	0.0182619	-1.54278
RNA5SP513	-6.04079	0.0680815	-3.28914	0.00125509	0.0234769	-1.90255
AC104758.3	-6.01989	0.102034	-3.49272	0.000630226	0.0150869	-1.26199
PNCK	-5.92827	0.0497093	-3.69651	0.000306915	0.00968691	-0.588297
USP2	-5.92307	0.325643	-3.02238	0.00295498	0.0411601	-2.6913
AC079804.1	-5.91704	0.0526432	-3.53317	0.000547639	0.0138339	-1.13082
LINC00029	-5.88948	0.0242172	-2.93593	0.00385544	0.0487087	-2.93429
KIF26B-AS1	-5.84021	1.06614	-3.67792	0.000328136	0.010019	-0.651075
AIMP1P1	-5.83685	0.127332	-3.04166	0.00278264	0.0398264	-2.63626
AC013553.3	-5.82397	0.0542021	-2.98449	0.00332266	0.0442883	-2.79856
AL365199.1	-5.81418	0.0760318	-3.40819	0.000842004	0.0181411	-1.53195
MIR193BHG	-5.80038	0.19272	-3.10541	0.0022766	0.0349529	-2.45205
KRT17	-5.76282	1.48595	-3.71707	0.000284955	0.00917562	-0.518547
RNU2-64P	-5.74098	0.367308	-3.34207	0.00105231	0.0209244	-1.73916
AL138808.1	-5.71957	0.230622	-2.96651	0.00351152	0.0459094	-2.84905
FAM198A	-5.71272	0.352261	-3.26512	0.00135861	0.0248227	-1.97593
TDRD9	-5.70692	3.1874	-3.7504	0.000252487	0.00848169	-0.404803
IGDCC4	-5.68738	0.297217	-3.02839	0.00290021	0.040678	-2.67416
AC000081.1	-5.61002	0.313118	-5.43869	2.16057e-07	8.10714e-05	6.35857
STARP1	-5.60301	0.0146751	-2.99445	0.00322214	0.0434123	-2.77048
RN7SL189P	-5.5959	0.14612	-3.09551	0.0023491	0.0355973	-2.48086
COL4A2-AS2	-5.57318	0.00481784	-2.92695	0.00396218	0.0495294	-2.95917
AC010931.3	-5.56683	0.0114526	-2.94508	0.00374943	0.0477915	-2.90887
SLC28A3	-5.54863	2.56881	-3.51828	0.000576769	0.0143049	-1.17924
AL355922.3	-5.53249	0.0983378	-3.01976	0.00297918	0.0413638	-2.69876
FGF13	-5.52524	0.184193	-3.26816	0.00134508	0.024649	-1.96667
RN7SL634P	-5.51321	0.297651	-3.32846	0.00110131	0.0215263	-1.78139
AL356134.1	-5.4664	0.0815906	-3.53839	0.000537765	0.0137118	-1.11381
OR7E14P	-5.45772	0.116804	-2.96919	0.00348277	0.0457136	-2.84155
GLUD1P2	-5.44126	2.29464	-4.09104	7.01939e-05	0.00376963	0.804828
PDZRN3	-5.43116	0.0879975	-4.34843	2.53429e-05	0.00196886	1.77412
AC091691.1	-5.41025	0.0124823	-3.33045	0.00109402	0.0214294	-1.77523
RD3L	-5.40555	0.31991	-3.90608	0.000142051	0.0059449	0.137421
AC096536.2	-5.38979	0.0495189	-4.26694	3.51533e-05	0.00245446	1.46223
F3	-5.37991	2.18849	-4.46276	1.58991e-05	0.00148138	2.21933
RN7SL311P	-5.3235	0.273322	-4.15578	5.45491e-05	0.00327039	1.04425
PURG	-5.31757	0.229483	-3.55744	0.000503099	0.0131581	-1.05151
AP003071.4	-5.23094	0.0154805	-3.07936	0.00247206	0.0368034	-2.52771
SNRPEP7	-5.2245	0.0455078	-3.06941	0.00255081	0.0374701	-2.55649
AC015922.3	-5.21395	0.343335	-3.84685	0.000177147	0.00683084	-0.07099
AC011270.1	-5.1777	0.0186806	-3.06354	0.00259825	0.0378944	-2.5734
LINC02045	-5.16113	0.00816707	-3.09421	0.00235882	0.0356857	-2.48465
CPA3	-5.14018	105.683	-4.82142	3.49368e-06	0.000541315	3.67215
AC018371.1	-5.11933	0.0702206	-2.98919	0.00327492	0.0437876	-2.78533
BEND6	-5.10729	1.06053	-3.7922	0.000216717	0.00772143	-0.261009
CACNA1C-IT3	-5.10469	0.16943	-3.16802	0.00186374	0.0306141	-2.26789
LMCD1-AS1	-5.06516	0.0236357	-3.29609	0.00122653	0.0231127	-1.88123
ATP12A	-5.05427	0.0643215	-3.7439	0.000258528	0.00860045	-0.427044
ACTN2	-5.04941	0.0345833	-3.61848	0.000405668	0.0114164	-0.850007
AC003685.2	-5.04144	0.0312309	-3.81339	0.000200466	0.00729867	-0.187576
LINC01645	-5.00926	2.76559	-3.34007	0.0010594	0.0210124	-1.74539
LINC01756	-4.99065	0.0115168	-3.02377	0.00294224	0.0410551	-2.68734
SEMA3G	-4.96609	0.381893	-3.5866	0.000454091	0.0123385	-0.955618
PCNAP4	-4.92141	0.0622873	-4.20897	4.42501e-05	0.00287106	1.24318
LINC00051	-4.91137	0.226434	-3.63311	0.000385129	0.0110527	-0.801313
MIR1293	-4.89479	0.310481	-2.93961	0.00381246	0.0483175	-2.92407
RF02249	-4.88962	0.165537	-2.93677	0.00384558	0.0486064	-2.93195
AP000941.1	-4.8849	0.137906	-3.17472	0.00182393	0.0301577	-2.24798
MEIS3P1	-4.84267	0.237251	-3.59507	0.000440714	0.0120882	-0.927624
OSTCP6	-4.81754	0.494025	-3.20624	0.00164707	0.0281478	-2.15389
CACNA1C-AS4	-4.81513	0.185947	-3.02092	0.00296843	0.0412744	-2.69545
DLX4	-4.80115	0.572457	-2.94389	0.00376314	0.0478826	-2.9122
CARMN	-4.78277	0.057134	-4.12327	6.19331e-05	0.00350736	0.923669
AC015922.2	-4.76008	0.33636	-3.40358	0.000855285	0.0183119	-1.54651
AC106738.2	-4.74018	0.10702	-3.04033	0.00279416	0.0398765	-2.64004
SMYD1	-4.73393	0.00686116	-3.83817	0.000182938	0.00692565	-0.101326
NDUFS5P5	-4.70913	0.780816	-3.03954	0.00280109	0.0399135	-2.64231
DNAJC19P8	-4.70274	0.683267	-3.63345	0.000384659	0.0110507	-0.800167
SSTR2	-4.68108	0.37796	-3.57271	0.000476841	0.0127427	-1.00137
AC105101.1	-4.65431	0.0353694	-3.5707	0.00048022	0.0127976	-1.00798
IL17RE	-4.65067	7.69785	-3.4357	0.000766685	0.0171699	-1.44472
TWIST1	-4.63127	0.458353	-3.01089	0.00306235	0.0419878	-2.72396
CLTCL1	-4.62208	5.76884	-4.76968	4.36823e-06	0.000635744	3.45745
HMGB3P2	-4.60652	0.0479889	-3.81487	0.000199376	0.00728129	-0.182438
AC007923.4	-4.60341	0.0668469	-3.74778	0.000254906	0.00853918	-0.413772
AL359771.1	-4.58596	0.0182184	-3.0405	0.00279275	0.0398765	-2.63958
IRX3	-4.58451	4.35999	-4.32705	2.76259e-05	0.00209316	1.69186
HES3	-4.56346	0.0736043	-4.36198	2.39903e-05	0.00189582	1.82645
MTND4P4	-4.53177	0.0180717	-3.5854	0.000456011	0.0123785	-0.959568
AL356309.2	-4.52916	0.129493	-3.64682	0.00036676	0.0106586	-0.755488
PBK	-4.52622	1.81291	-4.49014	1.42016e-05	0.00138126	2.32729
RPL7P41	-4.51474	0.1112	-3.06307	0.00260209	0.0379304	-2.57475
TRGV10	-4.49008	5.7793	-3.49965	0.000615285	0.0148655	-1.2396
LINC00337	-4.46689	0.121074	-4.99247	1.65075e-06	0.00031726	4.39378
FKBP4P1	-4.46387	0.140367	-3.09163	0.00237813	0.0358992	-2.49214
MT1L	-4.44925	0.462057	-3.47559	0.000668597	0.0156084	-1.31713
PTP4A1P2	-4.43425	0.112841	-2.9918	0.00324865	0.0436629	-2.77797
FBLN1	-4.42752	0.730784	-3.06977	0.00254788	0.037447	-2.55544
AQP4	-4.41376	0.023152	-3.88114	0.000155934	0.00629662	0.0493626
PTPRG	-4.41345	0.366899	-4.60238	8.89705e-06	0.00100358	2.77494
PRSS12	-4.4103	0.604649	-3.84441	0.000178757	0.0068309	-0.0795221
AC017006.2	-4.40101	1.70669	-3.94092	0.000124607	0.00545926	0.26124
TREH	-4.38944	0.0292838	-3.14652	0.00199693	0.0320766	-2.33148
SNRPEP5	-4.3848	0.126687	-3.56152	0.000495957	0.0130226	-1.03814
AP002761.4	-4.37902	7.00044	-4.35731	2.44487e-05	0.0019183	1.80838
PLA2G16	-4.37192	1.87835	-3.2821	0.00128463	0.0239226	-1.9241
TRIM36	-4.36905	0.398711	-3.68345	0.000321674	0.00990136	-0.632404
DHCR24-DT	-4.35012	0.0534504	-4.18254	4.91099e-05	0.00305395	1.14409
IRX5	-4.34405	1.23995	-3.23277	0.00151067	0.026512	-2.07404
KRT18P62	-4.3403	0.159055	-4.13024	6.02755e-05	0.00345601	0.94943
AC124798.1	-4.3265	1.23799	-4.58527	9.55954e-06	0.00105882	2.70613
ST5	-4.3223	0.379363	-4.07386	7.50153e-05	0.00390958	0.74181
AL357078.2	-4.30136	0.188993	-3.45044	0.000728971	0.0165812	-1.39773
ATP8A2	-4.29175	0.110204	-3.01262	0.00304589	0.041866	-2.71903
AC118755.1	-4.25329	0.387868	-3.13618	0.00206411	0.0327733	-2.36194
LOXL4	-4.22657	2.64867	-3.84532	0.000178157	0.00683084	-0.0763506
ZBTB7C	-4.22573	0.092636	-3.49749	0.000619914	0.0149514	-1.24659
AZIN2	-4.22568	0.43066	-3.04111	0.00278744	0.0398425	-2.63783
AC007618.1	-4.21306	0.128897	-3.78043	0.000226268	0.00791925	-0.301623
AP001485.1	-4.20997	0.55289	-3.86466	0.000165807	0.00654669	-0.0085767
LMLN-AS1	-4.19362	0.1776	-3.04022	0.00279512	0.0398765	-2.64036
AP1S3	-4.19088	2.89285	-3.03955	0.00280097	0.0399135	-2.64227
RPL31P13	-4.18883	0.0271654	-3.08351	0.00243997	0.0365486	-2.51572
HMGN2P34	-4.16795	0.0565768	-3.03459	0.00284466	0.040224	-2.65645
HSPA4L	-4.15336	0.723238	-4.05045	8.20997e-05	0.00417657	0.656242
LINC01556	-4.15263	0.0908052	-3.47755	0.000664118	0.0155616	-1.31086
ASS1	-4.1455	1.61993	-3.78248	0.000224575	0.00787496	-0.294549
AC080112.2	-4.13399	0.0996916	-3.06906	0.00255354	0.0374803	-2.55747
TNFRSF11B	-4.12367	0.164569	-2.93892	0.00382056	0.0483788	-2.926
FAM45BP	-4.07389	0.42663	-4.47695	1.49965e-05	0.0014305	2.2752
PPP1R3G	-4.0597	0.550609	-2.98343	0.00333359	0.0443612	-2.80156
LINC02503	-4.05724	0.0133237	-3.15225	0.0019606	0.0317141	-2.31457
BTF3P7	-4.05536	0.848732	-3.17568	0.00181826	0.0301001	-2.24511
HGF	-4.02182	25.3639	-3.31407	0.00115543	0.0222685	-1.82588
AC112653.1	-4.0217	0.180717	-3.11605	0.00220094	0.0340825	-2.42098
ALG1L5P	-4.02036	0.0926438	-4.06169	7.8622e-05	0.00403791	0.697277
ERICH2	-4.02004	0.0628771	-3.31562	0.00114946	0.0222034	-1.82108
LAMB3	-3.99733	0.255469	-3.00604	0.00310871	0.0424124	-2.73771
PTGFRN	-3.99701	1.26885	-4.38412	2.19294e-05	0.00180232	1.91216
LINC01354	-3.99461	0.0535755	-3.06451	0.00259035	0.0378314	-2.5706
RPL21P91	-3.97676	0.158001	-3.627	0.000393585	0.0112253	-0.821671
MRGPRF	-3.9563	0.118213	-3.5547	0.00050794	0.0132097	-1.06047
LINC02385	-3.95618	0.124194	-2.99853	0.00318182	0.0430983	-2.75897
RPS27AP18	-3.95582	0.0714422	-3.45484	0.000718055	0.0163891	-1.38366
TFF2	-3.94876	0.0333202	-3.00137	0.00315397	0.042892	-2.75093
AC089983.1	-3.9476	0.269442	-3.74485	0.000257636	0.00858632	-0.423792
AL357060.1	-3.94519	3.33151	-3.07305	0.00252176	0.0372426	-2.54598
SLC25A23	-3.94086	1.80837	-3.028	0.00290378	0.0406995	-2.67529
AL359091.2	-3.93418	0.456595	-4.75154	4.72251e-06	0.000667921	3.38255
MMP2	-3.93177	12.2915	-3.96344	0.000114437	0.00513605	0.341765
AC023906.2	-3.92956	0.189291	-3.11381	0.00221668	0.0342458	-2.42753
AC027627.1	-3.91914	0.96264	-3.27231	0.0013268	0.0244358	-1.95401
NUDT10	-3.91569	1.25133	-3.00692	0.00310018	0.0423343	-2.73519
RASGRF1	-3.91444	0.218472	-3.04403	0.00276208	0.0396597	-2.62946
RPS24P1	-3.9058	0.0476365	-3.37028	0.000957215	0.0195915	-1.6512
P2RY2	-3.90125	8.8049	-3.86471	0.000165778	0.00654669	-0.00841497
AL161729.1	-3.8757	0.125317	-3.03001	0.0028856	0.0405409	-2.66954
AL590762.2	-3.87442	0.42362	-3.79968	0.000210842	0.00756659	-0.235124
MT-TI	-3.86188	13.8143	-3.12089	0.0021673	0.0337987	-2.40682
AL353637.1	-3.85635	0.0153333	-3.09277	0.00236962	0.0358098	-2.48885
MIR4777	-3.85015	0.803114	-3.41706	0.000816985	0.0178119	-1.50388
AP000907.1	-3.8317	0.381996	-3.4347	0.000769288	0.0172166	-1.44787
RNU6-354P	-3.83133	1.13648	-3.05899	0.00263563	0.0383079	-2.5865
CCDC26	-3.83101	2.15261	-2.98414	0.00332629	0.0442972	-2.79956
CRNDE	-3.80765	7.46478	-5.0164	1.48436e-06	0.000295224	4.49618
AL596330.1	-3.80438	0.034036	-3.41823	0.000813731	0.0177902	-1.50017
NCR3LG1	-3.80325	2.38135	-4.20284	4.53349e-05	0.00291245	1.22015
AC099518.4	-3.79609	0.0444621	-3.71001	0.000292321	0.00936359	-0.542528
LINC01555	-3.79414	0.038932	-2.9356	0.00385933	0.0487355	-2.9352
GPR153	-3.78545	2.86675	-4.607	8.72612e-06	0.000994471	2.79353
AL356258.1	-3.776	0.200071	-3.30572	0.00118794	0.0226781	-1.85161
ANKRD18B	-3.76621	2.27883	-3.16983	0.00185291	0.0304725	-2.26252
NRIP3	-3.75767	2.23016	-3.51116	0.000591225	0.0145004	-1.20235
MRAS	-3.73626	0.969052	-3.6225	0.00039992	0.0113334	-0.836634
ASS1P4	-3.72789	0.0064448	-3.18245	0.001779	0.0296907	-2.22499
PDCL3P6	-3.72663	0.312181	-4.66289	6.89242e-06	0.000854335	3.01968
MPP2	-3.7234	0.287103	-3.08364	0.00243895	0.0365486	-2.51533
AC139100.1	-3.70875	0.144807	-3.7853	0.000222269	0.00783896	-0.284831
PTPRU	-3.70708	0.280293	-3.402	0.000859887	0.0183342	-1.55151
HNRNPA1P11	-3.70262	0.138753	-3.80542	0.000206435	0.00745624	-0.215224
MTND2P38	-3.68351	0.0341631	-3.23084	0.00152024	0.026629	-2.07988
AC024884.1	-3.67953	0.462718	-4.70531	5.75495e-06	0.00076307	3.19272
SMARCA1	-3.67776	0.607012	-3.12531	0.002137	0.0335157	-2.39387
RGS9BP	-3.67474	0.391925	-3.97129	0.000111084	0.00503004	0.369895
AC018845.1	-3.6726	0.0653845	-3.75455	0.000248702	0.00838005	-0.390592
LMNB1-DT	-3.67193	0.283802	-3.76637	0.000238209	0.00815604	-0.350032
CYP2E1	-3.66926	0.621845	-3.41722	0.000816533	0.0178101	-1.50337
AC105250.1	-3.66689	0.135214	-4.71833	5.44389e-06	0.000730607	3.24606
RNA5SP165	-3.66389	0.920289	-3.07823	0.00248087	0.036845	-2.53098
SHH	-3.66054	0.153989	-3.18281	0.0017769	0.0296648	-2.2239
RPL21P41	-3.65346	0.331937	-3.92025	0.000134691	0.00572373	0.187688
RASAL2-AS1	-3.64992	0.146656	-3.50098	0.00061246	0.0148235	-1.2353
AL355377.1	-3.63908	0.192072	-2.96313	0.00354805	0.0462393	-2.8585
HSPE1P6	-3.63364	0.272176	-3.00222	0.00314563	0.0427933	-2.7485
BIK	-3.6252	5.99349	-4.72752	5.23421e-06	0.000709371	3.28376
ATP1B3P1	-3.61707	0.199644	-5.53345	1.3837e-07	6.20516e-05	6.7904
RPS24P17	-3.60668	0.528594	-3.0161	0.00301316	0.0416549	-2.70914
AC009075.2	-3.59543	0.574781	-3.05999	0.00262737	0.038208	-2.58362
NKX3-1	-3.58914	0.501827	-3.53341	0.000547177	0.0138321	-1.13003
RPL7P37	-3.58477	0.59743	-3.21113	0.00162109	0.02783	-2.13921
TMEM231	-3.5817	0.547288	-2.95253	0.00366517	0.0472242	-2.88813
DCLK2	-3.57766	0.740939	-3.46458	0.000694433	0.0160142	-1.35248
AL589647.1	-3.57742	0.537049	-3.05301	0.00268553	0.0388703	-2.6037
HNRNPA1P47	-3.5414	0.206037	-3.34784	0.00103218	0.0206882	-1.72122
AL589826.1	-3.53894	0.358717	-3.21333	0.00160955	0.0277145	-2.13261
MT-TS2	-3.52845	2.46087	-2.97654	0.00340505	0.0450621	-2.82093
MAGOH3P	-3.5169	1.67443	-5.37865	2.85835e-07	9.82895e-05	6.08757
LINC01657	-3.51377	0.0398366	-3.03442	0.00284621	0.040224	-2.65695
AL591686.2	-3.51031	0.46692	-3.65713	0.000353501	0.0104495	-0.720949
RN7SL275P	-3.50383	0.0416259	-2.98443	0.00332329	0.0442883	-2.79873
HMGB3P6	-3.50254	0.0726858	-4.03856	8.59372e-05	0.0043006	0.612944
LINC01513	-3.49431	0.287395	-4.26183	3.58764e-05	0.00248606	1.44284
ROPN1L	-3.49215	1.29391	-4.1642	5.27787e-05	0.00319914	1.07561
AL121721.1	-3.48853	0.184076	-2.92324	0.00400704	0.0498251	-2.96943
TPT1P1	-3.48153	0.592334	-3.92362	0.000132998	0.00568098	0.199642
AC131159.1	-3.48054	1.97023	-4.74455	4.86624e-06	0.00067782	3.35375
AC009963.3	-3.4795	0.0661007	-3.00773	0.00309244	0.042274	-2.7329
AC093151.2	-3.478	0.273194	-4.60816	8.68358e-06	0.000991906	2.79821
RNU6-786P	-3.475	1.11032	-3.2782	0.00130128	0.0241107	-1.93603
RPL7P13	-3.47206	0.655275	-3.32952	0.00109741	0.0214806	-1.7781
SMIM11A	-3.47097	0.0191129	-3.51848	0.000576384	0.0143032	-1.17861
NANOS1	-3.47046	0.414469	-4.94611	2.02604e-06	0.000376277	4.19644
HNRNPA1P18	-3.45887	0.0138237	-3.04337	0.00276777	0.0397158	-2.63135
AL049737.1	-3.45335	0.0307367	-3.42666	0.000790699	0.0174527	-1.47344
AC104472.1	-3.44266	0.0243523	-3.38252	0.000918468	0.0190601	-1.61279
ZNF90P2	-3.43301	0.0292713	-3.34375	0.00104642	0.0208825	-1.73394
MTND2P9	-3.43116	0.169121	-3.7917	0.00021711	0.00772143	-0.262716
SNX18P8	-3.42945	0.0175475	-2.94647	0.00373362	0.0477272	-2.90501
AC007563.3	-3.42584	0.0401383	-3.37284	0.000948976	0.0194722	-1.64316
AC120042.2	-3.42308	0.164227	-3.4886	0.000639266	0.0152251	-1.27528
AC009117.1	-3.42287	0.148399	-2.93315	0.00388829	0.0489778	-2.94202
SPATA18	-3.41874	0.31421	-3.66109	0.000348532	0.0103973	-0.707668
AP000907.2	-3.41815	0.224938	-3.31119	0.00116655	0.0223917	-1.83476
AC073352.1	-3.41635	0.265277	-5.53138	1.39732e-07	6.21571e-05	6.7809
AJ239328.1	-3.41626	0.66144	-3.41662	0.000818212	0.0178246	-1.50528
PIGUP1	-3.40772	0.118925	-4.41754	1.91372e-05	0.00166234	2.04221
RPL23AP61	-3.40351	0.704096	-3.39969	0.000866629	0.0183997	-1.55877
STXBP1	-3.40026	1.3902	-4.39947	2.06014e-05	0.00173489	1.9718
GMPSP1	-3.39588	0.35927	-3.93906	0.000125481	0.00547621	0.254633
RPS15AP28	-3.39496	0.269854	-3.68388	0.000321184	0.00989179	-0.630971
RPL7P45	-3.39358	0.128143	-3.37935	0.000928363	0.0192004	-1.62275
AL049835.1	-3.39232	1.05337	-5.01505	1.49327e-06	0.000295224	4.49041
MTND2P19	-3.39226	0.0304366	-2.96685	0.00350786	0.0458943	-2.8481
AL160275.1	-3.39168	0.178283	-2.98119	0.00335665	0.0445821	-2.80786
RNU6-1189P	-3.39013	0.726243	-4.28664	3.24927e-05	0.00231559	1.5372
AC007389.2	-3.37763	0.161369	-3.33884	0.00106377	0.021084	-1.74921
HMGN2P40	-3.37626	0.314238	-4.22857	4.09468e-05	0.00273106	1.317
AP002761.1	-3.37193	1.45071	-3.02795	0.00290421	0.0406995	-2.67543
WWC2-AS1	-3.37132	0.140393	-3.68667	0.000317973	0.00985342	-0.621538
RASAL2	-3.36695	0.934459	-5.0183	1.47185e-06	0.000294151	4.50434
RPL7P30	-3.34545	0.0495696	-3.20189	0.00167051	0.0284364	-2.16693
MTND4LP5	-3.34213	6.60998	-3.02949	0.00289033	0.0405772	-2.67104
DIXDC1	-3.34168	0.948587	-4.52503	1.22904e-05	0.00123627	2.46555
SYF2P2	-3.3403	0.562716	-3.37919	0.000928879	0.0192039	-1.62327
PRDM12	-3.33027	0.0598808	-3.83917	0.00018226	0.00690946	-0.0978242
AL162426.1	-3.31366	0.104415	-4.9015	2.46477e-06	0.000426189	4.00772
RPL22P16	-3.30838	0.448849	-3.62751	0.000392873	0.0112108	-0.819973
AD000813.1	-3.30819	0.845179	-4.43243	1.80068e-05	0.00160718	2.10037
PDCD5P1	-3.30247	0.167475	-3.51759	0.000578164	0.014333	-1.18149
AL354868.1	-3.29957	0.319838	-3.08647	0.00241724	0.0363308	-2.50712
NIFKP1	-3.29884	0.0422932	-3.99033	0.000103333	0.00480999	0.438346
AXL	-3.29799	0.634449	-3.22067	0.0015715	0.0272843	-2.11052
RPL7P2	-3.29694	0.307549	-3.07911	0.00247401	0.0368225	-2.52844
SPATA41	-3.29122	0.327977	-3.55443	0.000508425	0.0132097	-1.06136
CFAP61	-3.28207	0.0168599	-4.04625	8.34341e-05	0.00422215	0.64096
NFU1P1	-3.28183	0.0254757	-3.34068	0.00105723	0.0209991	-1.74348
AC004257.1	-3.27846	0.201205	-3.43943	0.000756952	0.0170211	-1.43282
LINC01664	-3.27753	0.41329	-3.90663	0.000141757	0.00593712	0.139376
NEIL3	-3.27649	5.2572	-4.91423	2.33097e-06	0.000409942	4.06145
AC011257.1	-3.27127	2.34135	-3.17776	0.00180611	0.0299798	-2.23893
HSP90B3P	-3.27116	0.30771	-6.02646	1.26701e-08	1.04309e-05	9.1133
RNU6-226P	-3.26967	4.89801	-3.51523	0.000582917	0.0143991	-1.18914
CCDC34	-3.26929	2.59033	-4.41012	1.97264e-05	0.00168958	2.01324
MTCO3P13	-3.26907	0.93051	-2.99113	0.00325536	0.0436721	-2.77986
AL157884.1	-3.26765	0.0538756	-3.15917	0.00191753	0.0312648	-2.2941
ATP4B	-3.26622	0.150407	-3.18028	0.00179148	0.0298719	-2.23143
MIR4999	-3.26613	2.26975	-4.13503	5.91594e-05	0.00342411	0.96718
C1QL4	-3.25879	0.0316624	-3.76837	0.000236475	0.00814215	-0.343154
AC023051.1	-3.25671	3.07418	-3.2201	0.00157443	0.0273202	-2.11224
AC005197.1	-3.25538	0.40094	-4.79777	3.87017e-06	0.000583264	3.57377
RNU2-59P	-3.25252	0.696305	-3.03008	0.00288497	0.0405409	-2.66934
MS4A3	-3.24808	53.9794	-4.79673	3.88749e-06	0.000584279	3.56948
RPSAP2	-3.23597	0.219062	-3.49354	0.000628442	0.0150845	-1.25934
CHRNA6	-3.23534	0.725924	-2.97142	0.00345905	0.0455256	-2.83531
RFX8	-3.2334	22.2972	-3.87698	0.000158371	0.00636243	0.0347225
IGFBP2	-3.23311	10.4577	-4.45541	1.6387e-05	0.00151914	2.19044
AL354702.1	-3.21785	0.243019	-3.33575	0.00107483	0.0212017	-1.75881
AC092017.2	-3.21562	0.595784	-4.1904	4.76135e-05	0.0030015	1.17351
AC018695.2	-3.20508	1.80038	-3.73172	0.000270223	0.00881966	-0.468647
EFCAB2	-3.19692	4.67987	-3.02649	0.00291739	0.0408117	-2.67957
AL160281.1	-3.19659	0.347369	-3.37372	0.00094617	0.019452	-1.64041
SLC30A3	-3.19618	0.0690477	-3.39671	0.000875432	0.018487	-1.56817
RPL35AP21	-3.19273	0.548979	-3.9268	0.000131416	0.00563669	0.210948
AC092979.1	-3.19221	0.458011	-4.18438	4.87561e-05	0.00303928	1.15096
AL021397.1	-3.18847	0.0900434	-4.30515	3.01693e-05	0.00221547	1.6079
LTK	-3.18334	8.68104	-3.08343	0.00244053	0.0365486	-2.51592
AL589765.7	-3.169	0.290117	-3.68514	0.000319726	0.00988552	-0.6267
AL356309.3	-3.16057	0.113621	-3.83038	0.000188286	0.00704591	-0.128496
LRRN4CL	-3.15897	0.162798	-3.67696	0.000329262	0.0100392	-0.654291
RNU6-1164P	-3.15541	1.29519	-4.36708	2.35001e-05	0.00186779	1.84614
ZNF488	-3.15365	0.410972	-3.01329	0.00303957	0.0418416	-2.71713
LGR4	-3.14768	0.77461	-3.67469	0.000331958	0.0100884	-0.661945
AC004910.1	-3.1464	0.150321	-2.94461	0.00375484	0.0478211	-2.91018
SEPT14P12	-3.14591	0.391066	-3.21789	0.00158584	0.0274217	-2.11891
AC093484.4	-3.14382	8.4717	-3.26856	0.00134334	0.0246416	-1.96547
ISCA1P1	-3.14181	0.148847	-3.13499	0.00207197	0.0328629	-2.36543
AC129492.5	-3.13897	0.853403	-4.01024	9.57776e-05	0.00458593	0.510238
AC011481.3	-3.13629	0.0639613	-3.14957	0.00197756	0.0319268	-2.3225
RPL36AP39	-3.13605	0.382062	-2.99613	0.00320551	0.0432622	-2.76575
RNU6-1038P	-3.12655	0.411645	-3.41346	0.000827048	0.0179532	-1.51528
LGALS12	-3.12481	8.49025	-3.66198	0.000347418	0.0103866	-0.704664
HSPE1P7	-3.12164	0.211031	-3.8145	0.000199651	0.00728129	-0.183738
RFLNA	-3.10718	0.571939	-3.74147	0.000260829	0.00863844	-0.435376
RAB42	-3.09957	0.685043	-4.36358	2.38358e-05	0.00188631	1.83261
RPL22P19	-3.09649	1.18544	-5.57533	1.13471e-07	5.34954e-05	6.98277
AC100847.1	-3.0914	0.29551	-4.67652	6.50497e-06	0.00082107	3.07517
RNA5SP323	-3.08626	1.97329	-2.96973	0.00347702	0.045664	-2.84004
MT-TL1	-3.08179	94.1069	-3.27725	0.00130537	0.024162	-1.93893
AC064836.2	-3.07947	0.711989	-3.31115	0.00116669	0.0223917	-1.83488
RPL32P33	-3.07877	0.438321	-4.0455	8.36775e-05	0.00422284	0.638199
AJ011931.1	-3.07499	0.350093	-3.51904	0.000575251	0.0142929	-1.17677
AL133353.1	-3.06462	0.898705	-2.98767	0.00329028	0.043944	-2.78961
PC	-3.04829	0.963579	-3.35123	0.00102052	0.0205292	-1.71068
AL022237.1	-3.04788	0.48643	-4.17429	5.07285e-05	0.00310904	1.11326
MAP1B	-3.03293	0.234258	-4.29713	3.11553e-05	0.00226118	1.57725
AC108022.1	-3.03139	0.893941	-2.93479	0.00386893	0.0488008	-2.93747
TPT1P7	-3.0267	0.470506	-4.29976	3.08286e-05	0.00225228	1.5873
AP000442.1	-3.02224	0.219867	-2.99741	0.00319278	0.0431856	-2.76211
MIR5088	-3.02105	0.270795	-2.99836	0.00318349	0.0431021	-2.75944
FAM86LP	-3.01615	0.0629066	-3.07985	0.00246828	0.0367778	-2.52631
AC092718.3	-3.01386	0.31561	-2.98623	0.00330494	0.0441078	-2.79367
AP001775.2	-3.01319	0.771121	-3.57873	0.000466858	0.0125979	-0.98157
AL513497.1	-3.00699	1.92	-4.38468	2.18794e-05	0.00180126	1.91434
HMGN2P21	-3.00487	0.405333	-3.00049	0.00316255	0.0429875	-2.75341
RPL7P4	-3.00293	0.499891	-4.7542	4.66881e-06	0.000663729	3.39353
GFI1	-3.00199	30.8892	-4.38678	2.16941e-05	0.00179135	1.92246
TCF24	-3.00071	0.0443469	-2.92807	0.00394878	0.0494014	-2.95609
AL391219.1	-2.99919	0.534278	-3.68323	0.000321932	0.00990377	-0.633156
ATP5F1AP2	-2.99551	0.259939	-3.79192	0.000216938	0.00772143	-0.26197
AC021006.1	-2.98992	0.0993048	-3.08238	0.00244862	0.0366025	-2.51896
RNU6-583P	-2.98847	2.53278	-3.35133	0.00102018	0.0205292	-1.71037
MIR6131	-2.98434	0.383503	-3.65377	0.00035777	0.0105269	-0.732211
AC115284.2	-2.97664	0.144338	-3.10541	0.0022766	0.0349529	-2.45205
RSL24D1P4	-2.96479	0.0175943	-3.04391	0.00276314	0.0396597	-2.62981
AC004381.1	-2.96399	3.88784	-4.0028	9.85363e-05	0.00467742	0.483348
AL035078.1	-2.96366	0.0799591	-3.52458	0.000564279	0.0141419	-1.15878
MXRA7	-2.96286	1.47536	-3.42148	0.00080477	0.0176803	-1.48986
STAR	-2.96247	6.06408	-4.30486	3.02042e-05	0.00221547	1.6068
GFAP	-2.9609	0.0529671	-3.93198	0.000128874	0.00557761	0.229409
LINC01929	-2.95434	0.0155341	-3.90924	0.000140378	0.00590174	0.148615
RPL7P26	-2.95314	0.501065	-3.86115	0.000167986	0.00657625	-0.0208979
CDON	-2.9525	0.127013	-3.76283	0.000241307	0.00822634	-0.362189
TARM1	-2.95102	0.842288	-3.41042	0.000835644	0.0180687	-1.5249
AC087477.6	-2.94908	0.146743	-3.64826	0.000364881	0.0106221	-0.750671
NPM1P39	-2.94738	0.857291	-3.31952	0.00113464	0.0220062	-1.80905
RNU6-419P	-2.94656	0.592236	-3.5571	0.00050369	0.0131611	-1.05261
ATP23	-2.94386	8.44849	-3.37275	0.00094927	0.0194722	-1.64345
NPM1P5	-2.94239	0.291956	-3.89988	0.000145384	0.00604314	0.115512
AC009245.1	-2.93002	2.86912	-3.25826	0.00138961	0.0251475	-1.99681
RPS3AP42	-2.92727	0.172907	-3.4505	0.000728805	0.0165812	-1.39751
AL031316.1	-2.92465	0.382574	-3.2412	0.00146959	0.0260646	-2.04856
AC073263.2	-2.91181	0.163773	-3.4951	0.000625051	0.0150114	-1.25429
AC092047.1	-2.91172	0.224734	-3.7388	0.000263369	0.00867163	-0.44449
AL078604.1	-2.90921	1.29847	-3.91082	0.000139544	0.00587116	0.154244
RPSAP10	-2.90846	0.177421	-3.05366	0.00268005	0.0388104	-2.60182
MTCO1P15	-2.90745	0.555223	-3.33646	0.00107225	0.0211936	-1.75658
CENPA	-2.90574	3.27755	-5.5566	1.24011e-07	5.74816e-05	6.89663
RPL6P29	-2.90558	0.140958	-3.82455	0.000192387	0.00712685	-0.148808
RPL7P61	-2.90453	0.118759	-4.03466	8.72314e-05	0.00433069	0.598779
C16orf92	-2.89981	0.103876	-4.28358	3.28925e-05	0.00233503	1.52555
SERPING1	-2.89439	23.1258	-2.94752	0.00372159	0.0476729	-2.90207
AL135937.1	-2.89361	0.22031	-3.56999	0.000481417	0.0128035	-1.01031
HS3ST6	-2.88513	0.0255221	-3.71681	0.000285222	0.00917885	-0.519426
FAM114A1	-2.8829	1.1921	-4.40348	2.02675e-05	0.00171726	1.9874
HOGA1	-2.88209	0.0210676	-2.93456	0.00387161	0.0488124	-2.9381
DLGAP5	-2.88051	5.6242	-3.78656	0.000221244	0.00781279	-0.280477
MTATP8P2	-2.87976	17.5542	-3.3958	0.000878146	0.0185254	-1.57105
MTND4LP21	-2.87779	0.0987588	-3.51142	0.000590685	0.0144936	-1.2015
MIR5695	-2.87754	7.19414	-4.06482	7.7678e-05	0.00399687	0.708732
KCNJ11	-2.87682	0.29376	-3.637	0.000379832	0.0109463	-0.788327
LYST-AS1	-2.87624	3.86358	-3.22537	0.00154763	0.0269547	-2.09638
HSP90AA6P	-2.87257	0.462311	-3.58337	0.000459279	0.0124488	-0.966253
ITGB6	-2.87162	0.1492	-4.14494	5.69119e-05	0.00334313	1.00397
NPM1P12	-2.87143	0.240104	-3.47186	0.000677256	0.0157424	-1.32913
ARF4P1	-2.86729	0.170378	-4.74593	4.83747e-06	0.000677811	3.35945
AC011199.1	-2.86124	0.0630668	-2.99457	0.00322095	0.0434068	-2.77014
HMGN2P47	-2.86013	0.0687816	-3.26827	0.00134461	0.024649	-1.96634
LHFPL6	-2.85918	2.49744	-3.09715	0.002337	0.0355114	-2.47611
AC092754.1	-2.85742	0.423749	-3.32684	0.0011073	0.0215974	-1.78642
MT-TL2	-2.85441	5.46722	-3.09335	0.00236525	0.0357536	-2.48715
RPL21P93	-2.84918	0.845871	-3.51658	0.000580187	0.0143638	-1.18475
AC090525.1	-2.84838	0.300108	-3.34009	0.00105931	0.0210124	-1.74531
LRRC71	-2.8476	0.325343	-3.03536	0.0028379	0.040158	-2.65427
AC005726.5	-2.84583	0.385003	-3.28018	0.00129282	0.0240184	-1.92998
RPL7P48	-2.84527	0.541625	-3.02	0.00297692	0.0413613	-2.69807
RPL6P25	-2.84488	0.214735	-3.83325	0.0001863	0.00701632	-0.118497
BTF3L4P1	-2.84281	0.119732	-3.02055	0.00297184	0.0413114	-2.6965
SNRPFP4	-2.84048	1.08458	-4.45379	1.64964e-05	0.00152672	2.18408
AL138787.1	-2.83521	0.941597	-4.42635	1.84607e-05	0.00161946	2.07658
AC027319.1	-2.83422	0.344011	-4.50438	1.33894e-05	0.00133311	2.38362
HNRNPA3P3	-2.82721	0.188069	-3.36284	0.000981487	0.0199256	-1.67446
MTCO1P45	-2.81833	0.457225	-2.93489	0.00386766	0.048796	-2.93717
RPL7P20	-2.81621	0.290185	-3.52413	0.000565166	0.0141507	-1.16025
AL355482.1	-2.81447	0.205275	-3.01031	0.00306787	0.0420319	-2.72561
RPS4XP20	-2.81184	0.36357	-2.95061	0.00368672	0.0473691	-2.89348
HMGB3	-2.81116	6.18416	-6.63289	5.74845e-10	1.13242e-06	12.1308
RPL7P44	-2.80785	0.679284	-4.17068	5.1454e-05	0.00313608	1.09976
AC114728.1	-2.80629	0.881866	-3.19863	0.00168826	0.0286267	-2.17669
ALDH7A1P1	-2.80538	0.0517844	-2.98649	0.00330227	0.0440828	-2.79293
RPL7P15	-2.80262	0.456395	-3.48015	0.000658171	0.0155077	-1.30247
AP003469.3	-2.7999	0.138195	-3.07319	0.00252065	0.0372426	-2.54558
HMGB1P11	-2.79785	0.128401	-3.3613	0.000986575	0.0199994	-1.67926
PTGR1	-2.79755	1.72539	-4.13747	5.85984e-05	0.00340302	0.976229
AC013267.1	-2.79573	1.23395	-4.41831	1.90777e-05	0.00166174	2.04518
AL451062.1	-2.7946	2.77945	-4.18567	4.85083e-05	0.0030302	1.15581
RPL21P120	-2.78956	0.968331	-3.72881	0.000273089	0.00888691	-0.478566
AC106820.3	-2.78705	2.1747	-4.56664	1.03343e-05	0.00111537	2.6315
E2F7	-2.78687	1.8198	-3.27173	0.00132937	0.0244585	-1.95579
RND2	-2.7861	0.404593	-5.37389	2.92237e-07	9.82895e-05	6.06613
AC079804.2	-2.78496	0.0775737	-3.2736	0.00132117	0.0243819	-1.95006
RPL7P27	-2.78259	0.233916	-3.70745	0.000295035	0.00942318	-0.551212
AC108448.2	-2.77969	3.86567	-3.98344	0.000106076	0.00488022	0.41355
RPL21P4	-2.77887	1.02622	-3.99117	0.000103004	0.0048053	0.441369
GJC1	-2.77519	0.075904	-3.55321	0.000510611	0.0132478	-1.06537
FOXN1	-2.77003	0.0101936	-3.48412	0.000649232	0.0154004	-1.28971
PRRT4	-2.75872	5.85758	-3.81003	0.000202962	0.00737009	-0.199236
HMMR	-2.75644	6.05382	-4.29258	3.17284e-05	0.00229072	1.55988
PTGES3P3	-2.75575	0.762933	-4.6717	6.63958e-06	0.000834242	3.05553
AL590556.1	-2.75537	2.05507	-3.0789	0.00247568	0.0368274	-2.52905
LINC01583	-2.74584	0.128599	-4.52934	1.20727e-05	0.00123287	2.48266
SMIM10	-2.74356	3.66651	-4.01615	9.3638e-05	0.00450696	0.531636
AC092155.2	-2.73666	0.859288	-3.56438	0.000490993	0.0129459	-1.02873
AGRN	-2.73215	5.28181	-3.12407	0.00214548	0.0335532	-2.39751
DUSP8P3	-2.73143	0.940365	-3.73247	0.000269496	0.00880115	-0.466116
AC087685.1	-2.73006	0.331873	-3.09487	0.00235391	0.0356309	-2.48274
RN7SL376P	-2.72612	0.209103	-3.14081	0.0020338	0.0324226	-2.34832
SNX18P7	-2.72486	2.82099	-3.14909	0.0019806	0.0319369	-2.32391
RPS24P13	-2.72447	0.499555	-2.95168	0.0036746	0.0473237	-2.89048
PHLDA3	-2.72432	1.62827	-3.8093	0.000203513	0.00738478	-0.201793
RPS20P22	-2.7232	0.864124	-3.51612	0.000581127	0.0143742	-1.18626
CLDN24	-2.72253	0.0896492	-3.50886	0.000595948	0.0145535	-1.20978
KRT8P15	-2.71974	0.847115	-3.71714	0.000284878	0.00917562	-0.518294
EBF3	-2.71811	0.925238	-3.33525	0.00107662	0.0212167	-1.76036
AC112191.2	-2.71632	0.552427	-3.64938	0.000363433	0.0106103	-0.74694
NUF2	-2.70779	4.4149	-4.35029	2.51529e-05	0.00195961	1.7813
ADCY9	-2.70385	4.79529	-3.82842	0.000189654	0.00706949	-0.135321
Z99714.1	-2.69995	0.40586	-3.38469	0.000911784	0.0189865	-1.606
AC018648.1	-2.6958	0.349167	-3.06808	0.00256147	0.0375767	-2.56032
FO393409.1	-2.69505	0.053975	-3.26494	0.0013594	0.0248289	-1.97647
HMGN2P11	-2.69456	0.128393	-3.1928	0.00172042	0.0289843	-2.1941
Z82190.1	-2.69058	1.75049	-2.96891	0.00348576	0.0457313	-2.84233
ATP5F1CP1	-2.6829	0.197658	-2.97223	0.00345042	0.0454554	-2.83302
AL590762.3	-2.68273	0.924203	-4.95057	1.98665e-06	0.000370208	4.21535
COX6CP10	-2.68067	4.11804	-3.97074	0.000111316	0.00503004	0.367925
HMGN5	-2.67993	4.14952	-3.86612	0.000164909	0.00652528	-0.00345652
NANOG	-2.67809	0.0465934	-3.24407	0.00145585	0.0258876	-2.03988
CYP27B1	-2.67585	0.797191	-3.96061	0.000115671	0.00517459	0.331619
LINC01943	-2.66977	1.16839	-3.40168	0.000860796	0.0183434	-1.55249
AC017104.3	-2.6651	9.07435	-4.19711	4.63706e-05	0.00295353	1.19866
AL596325.2	-2.66427	1.82451	-4.39238	2.12055e-05	0.00176421	1.94421
SUMO1P2	-2.66125	0.0931654	-3.0283	0.00290105	0.040678	-2.67443
AC074051.4	-2.65409	0.187853	-3.76766	0.000237089	0.00815101	-0.345596
RPSAP39	-2.65305	0.328341	-3.3356	0.00107537	0.0212017	-1.75928
SNORD127	-2.65304	2.27288	-3.06776	0.00256404	0.0375843	-2.56124
RPL7P51	-2.65238	0.211499	-4.15223	5.53116e-05	0.00329527	1.03106
AC133041.1	-2.65231	0.19093	-3.15297	0.00195606	0.031687	-2.31243
PDGFA	-2.65048	0.330635	-3.72668	0.000275212	0.00894545	-0.485847
MT1E	-2.64973	1.44519	-3.07684	0.00249182	0.0369479	-2.53502
FAM45A	-2.64837	8.69371	-4.84549	3.14718e-06	0.000503175	3.77258
RPS7P8	-2.64427	0.295183	-3.85114	0.000174351	0.00674452	-0.0559868
DEPDC1	-2.64369	2.54555	-3.87944	0.000156925	0.00632736	0.0433834
AL133492.1	-2.64047	0.494727	-3.13381	0.00207978	0.0329217	-2.36889
HNRNPA1P55	-2.63992	0.290557	-3.51577	0.000581822	0.0143785	-1.18738
AL354950.1	-2.63889	0.325716	-3.42145	0.000804859	0.0176803	-1.48996
RPL7P6	-2.6369	1.56777	-3.46458	0.000694424	0.0160142	-1.35247
AC007041.1	-2.63621	0.869025	-3.84139	0.000180769	0.00687184	-0.0900793
AC006512.1	-2.62911	0.654694	-3.37894	0.000929657	0.0192128	-1.62405
HNRNPA1P2	-2.62886	0.273015	-3.2244	0.00155253	0.027023	-2.0993
AP001646.2	-2.62587	0.10124	-3.61753	0.00040704	0.0114376	-0.853172
RPS12P18	-2.62524	0.289457	-3.48	0.00065851	0.0155077	-1.30295
CERCAM	-2.62502	7.08542	-3.95904	0.000116362	0.00519708	0.325984
BLZF2P	-2.62196	1.65348	-5.38976	2.71453e-07	9.47664e-05	6.13755
AC135507.2	-2.619	7.25206	-3.97088	0.000111257	0.00503004	0.368426
CENPE	-2.61373	4.03749	-4.02755	8.9642e-05	0.00438737	0.57295
LMO3	-2.61177	0.194213	-3.58055	0.000463869	0.0125486	-0.97556
SCARNA14	-2.61154	0.892404	-3.70391	0.000298834	0.009506	-0.563233
AL603882.1	-2.6102	0.923621	-3.70486	0.000297807	0.00948424	-0.559997
DHX9P1	-2.60893	0.213967	-4.21033	4.40136e-05	0.00286991	1.24828
NOVA2	-2.60878	0.035662	-3.01286	0.00304365	0.041866	-2.71836
AC022034.2	-2.60779	0.430331	-3.13204	0.0020916	0.0330197	-2.37411
RPS3AP25	-2.60553	1.03362	-4.09596	6.8869e-05	0.00373892	0.82291
LDHAP2	-2.60475	6.78684	-3.73539	0.00026665	0.00873404	-0.456131
RPL7P47	-2.6038	1.46107	-3.51065	0.000592269	0.0145136	-1.204
MTUS2	-2.59587	0.52058	-2.95697	0.00361567	0.0468491	-2.87573
SLC17A7	-2.59552	0.0501488	-3.0348	0.00284281	0.0402171	-2.65586
AFF2-IT1	-2.59515	1.02472	-3.55447	0.000508356	0.0132097	-1.06123
CA15P2	-2.5947	0.0237749	-3.67972	0.000326015	0.00998482	-0.644987
AC080037.1	-2.59372	1.26399	-4.10419	6.6705e-05	0.00366472	0.853207
HMGB1P4	-2.59371	0.366531	-3.67618	0.000330187	0.0100512	-0.656925
AP000797.1	-2.58343	0.0784925	-3.12464	0.00214155	0.0335282	-2.39582
IQCK	-2.58327	0.472216	-3.99272	0.000102395	0.00478732	0.446978
RPL9P2	-2.58031	1.54752	-3.01298	0.00304254	0.0418617	-2.71802
NUCB2	-2.57854	41.1314	-5.61201	9.52996e-08	4.7357e-05	7.15207
HELLPAR	-2.57689	0.118777	-4.28528	3.26694e-05	0.00232218	1.53204
AC093591.2	-2.57373	0.429013	-3.58421	0.00045792	0.0124181	-0.963479
RPS27AP3	-2.57272	1.75873	-3.84624	0.00017755	0.00683084	-0.0731336
MT-TY	-2.5699	79.8821	-3.34247	0.00105093	0.0209154	-1.73794
UBE3AP2	-2.5685	0.0505349	-4.20849	4.4334e-05	0.00287106	1.24138
MIR8075	-2.56474	0.242904	-3.41463	0.00082377	0.0179173	-1.51158
BMS1P2	-2.56328	1.19493	-3.16495	0.00188225	0.0308081	-2.277
RN7SL753P	-2.56076	0.614457	-3.24886	0.00143318	0.0256499	-2.02536
ST13P18	-2.55993	0.159311	-3.66168	0.000347796	0.0103866	-0.705684
RPS17P5	-2.55706	0.531505	-3.193	0.00171931	0.0289843	-2.19351
FO393411.1	-2.55552	6.24112	-2.94137	0.00379209	0.0481472	-2.91918
RPL7P58	-2.55541	0.486615	-3.44278	0.000748338	0.016917	-1.42216
ANP32BP1	-2.55067	0.526632	-3.50974	0.000594135	0.0145456	-1.20694
PCBP3	-2.54998	1.97425	-3.56947	0.0004823	0.0128146	-1.01202
AC008427.1	-2.54743	0.162206	-3.29867	0.00121606	0.0230064	-1.87328
SNORA19	-2.54289	4.33929	-3.76142	0.000242548	0.00825336	-0.367017
SSMEM1	-2.54238	0.0181874	-3.13801	0.00205211	0.0326067	-2.35657
AL161645.1	-2.54138	0.603033	-3.06927	0.00255189	0.0374714	-2.55688
RPL12P2	-2.54001	0.352056	-3.76478	0.000239596	0.00818478	-0.355494
RPL9P7	-2.53936	1.98661	-3.98963	0.000103606	0.00481856	0.435848
MARC2	-2.5374	2.70029	-3.25478	0.00140558	0.0253121	-2.00738
PTMAP3	-2.53598	1.06254	-3.00323	0.00313582	0.0426904	-2.74565
DIAPH3-AS2	-2.53544	0.622682	-4.32268	2.81168e-05	0.00212451	1.67506
DEPDC1-AS1	-2.53387	0.0821284	-3.12605	0.00213198	0.033456	-2.3917
RPL7P1	-2.53349	6.34415	-3.03314	0.00285763	0.0403234	-2.66062
MT-TC	-2.53348	31.5821	-3.41216	0.000830718	0.0179975	-1.5194
AL354707.3	-2.53346	0.473329	-3.88256	0.000155111	0.00627716	0.0543594
AC010325.2	-2.5241	2.44364	-3.53287	0.000548206	0.0138391	-1.13178
AC093827.1	-2.52387	0.661594	-3.37458	0.000943412	0.0194212	-1.6377
ZNF711	-2.51777	5.2768	-3.27193	0.0013285	0.0244507	-1.95519
SNRPGP10	-2.51766	0.799226	-3.39876	0.000869377	0.0184259	-1.56172
HNRNPA3P1	-2.5155	0.180627	-3.34441	0.0010441	0.0208514	-1.73189
AC005224.3	-2.51431	1.79204	-3.98035	0.000107328	0.00490073	0.402447
WWC2	-2.51316	1.0614	-4.19271	4.71833e-05	0.00298462	1.18214
FBXO43	-2.51068	1.20899	-3.49122	0.000633505	0.0151478	-1.26683
TBX1	-2.50881	1.26718	-3.87954	0.000156868	0.00632736	0.0437296
AC002563.1	-2.50792	0.61259	-3.10297	0.0022943	0.0351239	-2.45917
AC091057.4	-2.50731	5.20948	-3.88595	0.000153161	0.00622572	0.0663069
SKA1	-2.50539	3.3398	-5.03057	1.39363e-06	0.000280551	4.55699
NACA2	-2.5043	1.5952	-4.03483	8.71767e-05	0.00433069	0.599374
AC005920.2	-2.50143	5.02555	-4.3238	2.799e-05	0.00211783	1.67937
AC092418.1	-2.50135	0.369741	-3.7473	0.000255352	0.00854362	-0.415415
AP002449.1	-2.50111	2.90739	-4.62484	8.09482e-06	0.00095378	2.8655
AC022968.1	-2.49667	1.096	-3.92704	0.000131295	0.00563669	0.211821
RPS3AP9	-2.49602	0.0506614	-3.06923	0.00255226	0.0374714	-2.55701
PPIAP55	-2.49579	0.393548	-3.76662	0.000237992	0.00815366	-0.349173
ZAR1	-2.49404	0.160354	-3.09677	0.00233981	0.0355391	-2.47722
TPT1P8	-2.492	0.305226	-3.74771	0.000254972	0.00853918	-0.414017
AC013356.1	-2.48318	0.826915	-3.67392	0.000332876	0.0101034	-0.664537
RPL9P21	-2.48188	0.564055	-3.47478	0.000670485	0.0156311	-1.31976
EEF1A1P42	-2.47644	0.361362	-3.14239	0.00202353	0.0323704	-2.34366
NPM1P46	-2.4755	0.312504	-4.52537	1.22734e-05	0.00123627	2.46688
AC023906.1	-2.4752	1.13377	-3.18198	0.0017817	0.0297267	-2.22638
DOC2B	-2.47331	1.22193	-3.0545	0.00267298	0.0387284	-2.5994
CIAPIN1P	-2.47234	0.89549	-2.98413	0.00332636	0.0442972	-2.79958
AL365318.1	-2.47227	2.79978	-3.22332	0.00155802	0.0270843	-2.10256
PPIAP25	-2.47184	0.128596	-3.35193	0.00101811	0.0205106	-1.70849
AC099522.1	-2.4696	0.121757	-3.66551	0.000343066	0.0102955	-0.692837
AC078817.1	-2.46947	5.34164	-3.06375	0.00259654	0.03789	-2.57279
AC080038.2	-2.46936	0.536583	-3.45766	0.000711134	0.0162964	-1.37464
RPL17P20	-2.4686	0.24321	-3.14231	0.00202407	0.0323704	-2.3439
HNRNPA1P54	-2.46642	0.056734	-4.09025	7.04079e-05	0.00377418	0.80194
RN7SL395P	-2.46565	1.26427	-3.47212	0.000676653	0.015735	-1.3283
AC011120.1	-2.46083	10.6255	-5.36828	2.99944e-07	9.96665e-05	6.04094
IFIT1P1	-2.4596	0.705259	-3.87801	0.000157769	0.0063521	0.0383206
TGFA	-2.45753	1.08507	-4.26053	3.60628e-05	0.00249485	1.43791
MARVELD2	-2.45688	0.422237	-3.01231	0.00304883	0.041884	-2.71991
AC004528.1	-2.45286	0.28345	-3.14588	0.00200106	0.0321049	-2.33338
RPL21P90	-2.45008	1.00077	-3.14161	0.0020286	0.032396	-2.34596
CDC25C	-2.44991	2.17519	-4.68588	6.25133e-06	0.000799205	3.11333
AL136116.3	-2.44977	0.609787	-4.13875	5.83059e-05	0.00340302	0.980982
NPM1P50	-2.44975	0.245183	-3.17711	0.00180995	0.0300075	-2.24089
MTCO1P22	-2.44755	3.37389	-3.22938	0.00152752	0.0266973	-2.0843
RPL21P11	-2.44746	1.22179	-3.607	0.000422522	0.0117233	-0.888143
RPSAP11	-2.44319	0.325848	-3.19984	0.0016816	0.0285314	-2.17304
AF279873.2	-2.44105	0.278384	-3.15362	0.00195203	0.0316496	-2.31053
LRRC75A-AS1	-2.44006	106.512	-3.09131	0.00238057	0.0359261	-2.49308
RANP6	-2.43686	0.256197	-2.95014	0.00369197	0.0473925	-2.89478
HSP90B2P	-2.43645	0.893696	-4.05631	8.02685e-05	0.00410383	0.677627
RPL21P119	-2.43601	1.23876	-3.38974	0.00089633	0.0188098	-1.59011
AL009174.1	-2.43268	4.70882	-3.09925	0.00232146	0.0353838	-2.46999
EEF1A1P34	-2.43225	0.480607	-3.29018	0.00125077	0.0234266	-1.89936
SNRPFP1	-2.43132	0.399107	-3.36692	0.000968097	0.0197702	-1.6617
MND1	-2.42817	3.98989	-5.07955	1.11971e-06	0.000241257	4.76804
C11orf96	-2.42801	0.506669	-3.57121	0.000479359	0.012792	-1.0063
AP000864.1	-2.42739	0.196379	-3.64436	0.000370002	0.0107246	-0.763741
MTCO1P3	-2.42722	3.41298	-2.9978	0.00318894	0.0431548	-2.76101
AC131888.1	-2.4264	0.0362333	-3.7521	0.000250932	0.00843973	-0.398991
AC092718.4	-2.42344	3.2392	-4.19044	4.76055e-05	0.0030015	1.17367
RPL4P5	-2.41991	2.91957	-3.01635	0.00301082	0.041633	-2.70843
CCNA2	-2.41682	13.6453	-3.9738	0.00011003	0.00498768	0.378917
RPL21P12	-2.41594	0.374718	-3.07304	0.00252182	0.0372426	-2.546
B4GAT1	-2.41511	2.9655	-3.41852	0.000812943	0.01778	-1.49927
AC002558.3	-2.41242	7.13749	-4.74573	4.8416e-06	0.000677811	3.35863
AP001029.3	-2.41023	0.363203	-3.31745	0.0011425	0.0221043	-1.81545
AFF2	-2.40947	2.86275	-3.57764	0.000468639	0.0126195	-0.985133
AC009296.1	-2.40944	0.524424	-3.34543	0.00104055	0.0208107	-1.72873
NPM1P34	-2.40943	0.158351	-2.95047	0.00368829	0.0473783	-2.89387
VDAC3P1	-2.4074	0.169087	-3.70555	0.000297066	0.00946612	-0.557657
MAPK6P4	-2.40066	0.016797	-3.29188	0.00124372	0.0233374	-1.89412
HYLS1	-2.39874	1.89642	-4.6734	6.5918e-06	0.00083013	3.06245
AC125611.4	-2.39754	0.0959527	-3.33255	0.00108636	0.0213475	-1.76871
TTK	-2.39088	4.23389	-4.50309	1.34609e-05	0.00133332	2.37852
RPL24P4	-2.39001	13.0206	-3.68067	0.000324911	0.00996761	-0.641803
TCP1P1	-2.38634	0.185716	-3.33141	0.00109051	0.0213833	-1.77224
CCT6B	-2.38552	0.901085	-3.47681	0.000665803	0.0155872	-1.31322
RN7SKP180	-2.38103	4.6095	-5.03127	1.38931e-06	0.000280551	4.55998
EHHADH	-2.37949	1.73034	-3.43657	0.000764395	0.0171326	-1.44193
AL807752.1	-2.37948	0.885918	-5.12741	9.02927e-07	0.000207519	4.97569
AL359091.5	-2.37926	0.828247	-3.51585	0.000581664	0.0143785	-1.18713
LINC01197	-2.37912	0.00707167	-2.92878	0.00394022	0.0493726	-2.95411
AC092042.1	-2.37822	0.662535	-3.3588	0.000994884	0.0201235	-1.68705
RPL9P18	-2.37686	1.01765	-2.94154	0.0037902	0.0481472	-2.91873
AC091868.2	-2.37629	0.046488	-3.31242	0.00116177	0.0223282	-1.83095
AL163973.1	-2.37351	0.312991	-3.12379	0.00214733	0.0335684	-2.3983
GPR85	-2.37224	0.336582	-2.92598	0.00397388	0.0495916	-2.96186
YWHABP1	-2.36829	0.263625	-3.01277	0.00304449	0.041866	-2.71861
NACA4P	-2.36743	0.46221	-4.86996	2.82904e-06	0.000471441	3.87509
RPL7P8	-2.36545	0.579401	-3.92569	0.000131965	0.00564802	0.207012
RPL7P60	-2.36545	0.290225	-3.10744	0.00226194	0.0347927	-2.44612
HIGD1AP9	-2.3634	0.290696	-3.20492	0.00165411	0.0282519	-2.15783
RGN	-2.36224	0.346047	-4.85846	2.97452e-06	0.000489765	3.82685
PTTG1	-2.3606	9.30112	-3.92071	0.000134459	0.00571831	0.189313
CEP164P1	-2.35613	0.30309	-3.11011	0.00224287	0.0345475	-2.43833
AL133477.1	-2.35587	5.88085	-4.73853	4.99325e-06	0.000692016	3.32901
AC017037.2	-2.35437	0.0460769	-3.48062	0.000657104	0.0155077	-1.30095
AC090515.1	-2.3533	1.16443	-4.63644	7.70823e-06	0.000928337	2.91241
AC020658.4	-2.35263	0.582735	-3.44141	0.000751844	0.016962	-1.42651
RPL7P31	-2.35142	0.0561133	-3.179	0.00179889	0.0299321	-2.23524
SLC29A4	-2.34773	0.547509	-5.81028	3.66751e-08	2.29882e-05	8.07939
C8orf59P2	-2.34734	2.07188	-3.27933	0.00129644	0.0240713	-1.93257
HSPA8P7	-2.34558	0.202701	-3.29608	0.00122654	0.0231127	-1.88123
RNU6-137P	-2.3425	1.49507	-3.21101	0.00162172	0.0278321	-2.13957
MTCO1P53	-2.34017	8.38683	-3.11353	0.0022186	0.0342598	-2.42833
SLPI	-2.33594	8.73395	-2.95597	0.00362671	0.046926	-2.87851
AC004158.1	-2.33591	0.545599	-4.09132	7.0117e-05	0.00376963	0.805868
BMS1P1	-2.32971	7.72843	-4.31848	2.85959e-05	0.00215481	1.65895
AL109741.2	-2.32811	1.56662	-3.51183	0.000589846	0.0144795	-1.20017
AP000943.1	-2.32774	0.731979	-3.83195	0.000187195	0.00703372	-0.123018
CDK1	-2.32172	8.52145	-4.08627	7.1503e-05	0.00380331	0.787297
AC064799.1	-2.32	3.15815	-3.32825	0.00110209	0.0215338	-1.78204
RN7SL375P	-2.31758	0.263592	-3.67842	0.000327541	0.0100189	-0.649373
TAF1L	-2.31535	0.0440638	-3.50131	0.00061176	0.014813	-1.23423
AL353997.2	-2.31222	0.00943222	-3.40059	0.000863988	0.0183648	-1.55593
SNORD63	-2.3086	14.0432	-4.58096	9.73347e-06	0.00107163	2.68886
AC090953.1	-2.30639	0.841873	-3.30717	0.00118224	0.022627	-1.84714
RPS3AP4	-2.30631	0.315308	-3.4419	0.000750587	0.016947	-1.42495
EEF1A1P21	-2.30503	0.127968	-3.96447	0.000113992	0.00512068	0.345448
BOLA3	-2.3039	1.38535	-3.8772	0.000158244	0.00636209	0.0354827
FAM72D	-2.293	0.417693	-4.29903	3.09187e-05	0.00225311	1.58452
RPL5P33	-2.28823	0.206451	-3.10714	0.00226413	0.0348166	-2.447
AC092354.2	-2.28318	0.559232	-3.15276	0.00195739	0.03169	-2.31306
HNRNPA1P51	-2.28233	0.19599	-3.26021	0.00138073	0.0250863	-1.99087
CCNB1	-2.28217	11.87	-3.76871	0.000236182	0.00814215	-0.341987
SPA17	-2.27761	0.540691	-3.60429	0.000426584	0.0117885	-0.897106
AL513302.1	-2.27362	0.549271	-4.18704	4.82476e-05	0.00301976	1.16093
AL365440.1	-2.2717	0.221756	-3.2743	0.00131813	0.0243573	-1.94793
CDCA2	-2.27163	3.38811	-4.41539	1.93064e-05	0.00166654	2.0338
AL139156.3	-2.27075	0.298556	-3.32381	0.00111852	0.0217625	-1.79578
AURKA	-2.26888	5.68871	-4.19828	4.61585e-05	0.00294342	1.20302
AC015909.5	-2.2675	2.02361	-3.69214	0.000311775	0.00976005	-0.603052
AC084024.3	-2.26573	0.256687	-3.55797	0.000502159	0.013149	-1.04976
AC009314.1	-2.2636	0.781074	-3.70155	0.000301388	0.00957617	-0.571226
TPT1P6	-2.2624	3.07598	-3.75633	0.000247092	0.008351	-0.384481
RPS7P4	-2.26152	0.942075	-3.45991	0.000705666	0.016198	-1.36744
NPM1P27	-2.26055	5.51443	-3.29837	0.00121729	0.0230104	-1.87422
RNU6-875P	-2.25995	5.56221	-5.34182	3.39065e-07	0.000106358	5.92229
FUNDC2P1	-2.25928	0.418312	-3.4754	0.00066905	0.0156084	-1.31776
AC114495.1	-2.25789	0.380774	-3.50783	0.000598095	0.0145781	-1.21314
OR11M1P	-2.25711	0.0999233	-3.0878	0.00240713	0.0362575	-2.50327
FAM57B	-2.25335	0.269785	-3.41408	0.000825307	0.0179398	-1.51331
AC104581.1	-2.25191	1.78214	-4.68903	6.1682e-06	0.000794677	3.12618
AC002044.1	-2.25133	1.35035	-3.60451	0.000426263	0.0117885	-0.896401
PPIAP9	-2.25095	0.209928	-3.24234	0.00146412	0.0260178	-2.04511
NPM1P6	-2.24909	0.977755	-3.39426	0.00088274	0.0185835	-1.5759
HSPD1P1	-2.24757	0.33605	-3.84364	0.000179265	0.0068309	-0.0822012
CNBD2	-2.24586	0.0659879	-3.21197	0.00161665	0.0277797	-2.13668
FAM72A	-2.24496	0.524792	-3.48051	0.000657373	0.0155077	-1.30134
AL592528.1	-2.24473	0.454887	-3.29675	0.00122385	0.0230949	-1.87921
RPL23AP50	-2.24426	3.183	-4.06696	7.70409e-05	0.00397893	0.716541
AC034102.5	-2.24219	0.738117	-2.9758	0.00341276	0.0450993	-2.823
SEPT8	-2.23999	2.44745	-3.64077	0.000374766	0.0108286	-0.775739
RN7SL604P	-2.23799	0.843014	-3.1405	0.00203581	0.0324453	-2.34923
AC027279.1	-2.23653	1.74706	-3.69935	0.000303789	0.00962475	-0.578681
AC108043.1	-2.23618	0.0627186	-3.1565	0.00193406	0.0314322	-2.30201
CDC6	-2.23568	4.51249	-4.56621	1.03532e-05	0.00111537	2.62975
RNU6-437P	-2.23386	5.01468	-4.20892	4.42591e-05	0.00287106	1.24299
AL513329.1	-2.23264	1.79692	-3.47967	0.000659272	0.0155077	-1.30403
RPL7P5	-2.23184	0.100895	-2.94823	0.00371358	0.0476034	-2.9001
PCLAF	-2.23135	15.6493	-4.3327	2.70038e-05	0.00205955	1.71357
MTCO1P14	-2.22629	0.21175	-3.81602	0.000198535	0.00726983	-0.178456
AC000089.1	-2.22624	3.53065	-4.94035	2.07817e-06	0.000383376	4.17198
BX679664.3	-2.22159	3.83503	-3.50059	0.000613281	0.0148368	-1.23655
AL591473.1	-2.21948	0.213071	-2.99926	0.00317461	0.0430665	-2.75689
AL160175.1	-2.21844	0.579989	-3.77924	0.000227258	0.0079264	-0.305732
PMP22	-2.21089	1.73162	-3.01466	0.00302667	0.0417459	-2.71324
ZNF714	-2.20995	5.10076	-3.4767	0.000666057	0.0155872	-1.31358
CORO2A	-2.20856	4.55009	-2.99097	0.003257	0.0436721	-2.78032
CENPK	-2.20836	6.88809	-3.65659	0.000354188	0.0104586	-0.722772
HNRNPA1P22	-2.20832	0.23714	-3.39888	0.00086903	0.0184259	-1.56134
GPT2	-2.20699	7.25126	-4.1198	6.2777e-05	0.00353394	0.910819
CDKN3	-2.20483	4.79012	-5.04683	1.29616e-06	0.000267771	4.6269
DSCC1	-2.20414	5.62033	-3.86932	0.000162956	0.00646802	0.00778917
KIAA0895	-2.19927	0.656763	-5.35457	3.19621e-07	0.000103162	5.97944
HSP90AA4P	-2.19903	0.178271	-2.92684	0.0039635	0.0495294	-2.95948
AL353705.3	-2.19802	0.0345701	-3.56885	0.00048335	0.0128166	-1.01405
KIF14	-2.19647	3.76093	-4.72663	5.25427e-06	0.000710343	3.28009
AC073136.1	-2.19609	0.0990058	-2.97278	0.00344453	0.045443	-2.83147
AC091100.1	-2.19502	0.172467	-3.48051	0.000657355	0.0155077	-1.30131
LINC01490	-2.19198	0.100103	-3.61937	0.000404388	0.0113968	-0.847046
RNU6-1208P	-2.19103	5.05966	-4.10632	6.61548e-05	0.00364539	0.861069
AC008155.1	-2.19071	1.12323	-3.0029	0.00313904	0.0427205	-2.74659
AC016245.1	-2.18934	1.06699	-2.94989	0.00369485	0.0474073	-2.89549
NOSTRIN	-2.1854	1.10623	-3.89186	0.000149813	0.00617063	0.0871734
DIAPH3-AS1	-2.18377	0.161416	-3.53132	0.000551184	0.0138952	-1.13685
MTCO1P2	-2.18371	9.3664	-2.99086	0.00325805	0.0436721	-2.78061
AGBL5-AS1	-2.17967	0.281484	-3.90267	0.000143873	0.0059984	0.125382
TMEM75	-2.17935	2.61004	-5.12221	9.24345e-07	0.000209819	4.95306
KNL1	-2.17628	5.42145	-3.74794	0.000254761	0.00853918	-0.413237
AC124916.1	-2.17002	0.4742	-3.22613	0.00154379	0.0269219	-2.09408
GGH	-2.16798	7.02863	-4.4427	1.72646e-05	0.00157145	2.14058
AC090844.3	-2.16336	0.0726468	-3.19246	0.00172233	0.0289843	-2.19512
AC018371.2	-2.16218	0.136307	-3.67587	0.000330558	0.010057	-0.657979
RANP1	-2.16174	1.1034	-4.53011	1.20341e-05	0.00123287	2.48572
DIAPH3	-2.16111	1.59778	-4.88586	2.63934e-06	0.000445208	3.94187
RPL7AP38	-2.16008	0.0987434	-3.40226	0.000859118	0.0183249	-1.55067
CCDC87	-2.15669	0.0795822	-3.17209	0.00183943	0.0303141	-2.25579
MGST1	-2.15581	23.2712	-4.18973	4.77389e-05	0.00300597	1.17101
AC097263.1	-2.15349	0.627995	-3.71535	0.00028673	0.00921839	-0.524383
TOP2A	-2.15182	22.8339	-4.1206	6.25812e-05	0.00353318	0.913785
GMNN	-2.15151	8.50411	-4.84341	3.17577e-06	0.000506278	3.76388
AP003097.1	-2.15141	0.0896648	-3.17245	0.00183734	0.0303044	-2.25474
SKA3	-2.14883	6.5587	-4.3333	2.69387e-05	0.00205805	1.71588
AC025750.2	-2.14822	0.267403	-3.49065	0.00063474	0.0151697	-1.26865
AC090206.1	-2.1469	0.738623	-3.34318	0.00104842	0.0208986	-1.73572
GRTP1-AS1	-2.14491	0.505492	-2.9307	0.00391728	0.0492419	-2.94879
AL645949.2	-2.14434	0.211246	-3.32747	0.00110495	0.0215592	-1.78445
NPM1P35	-2.14194	0.205355	-3.65534	0.000355771	0.0104941	-0.726954
AC093591.1	-2.14062	0.570785	-3.7911	0.00021759	0.00772332	-0.264795
RNU2-37P	-2.14006	1.51545	-3.13821	0.00205076	0.0325988	-2.35596
LRRC75A	-2.13939	3.77473	-3.19248	0.00172223	0.0289843	-2.19507
PSMA2P3	-2.13891	0.138038	-4.21643	4.29636e-05	0.00282459	1.27125
RPL12P38	-2.13821	0.245316	-3.89181	0.000149846	0.00617063	0.0869682
MTCO1P46	-2.13815	0.0719595	-2.96347	0.00354436	0.0462105	-2.85755
AC008953.1	-2.13763	3.22097	-3.37585	0.000939404	0.0193634	-1.63374
RNU6-126P	-2.13461	4.21139	-3.00355	0.00313271	0.0426659	-2.74474
AC017002.3	-2.13316	0.699463	-4.43247	1.80039e-05	0.00160718	2.10052
RPL23AP12	-2.13038	0.278993	-4.28611	3.25616e-05	0.0023175	1.53518
BRCA2	-2.12811	5.06272	-3.51691	0.000579534	0.0143541	-1.1837
ACSM1	-2.1279	6.85841	-4.6201	8.25806e-06	0.00096514	2.84636
TPT1P9	-2.12681	8.68866	-3.66583	0.000342671	0.0102893	-0.691755
PIN4P1	-2.12561	1.92191	-3.48909	0.000638188	0.0152062	-1.2737
AC007204.1	-2.12514	1.02935	-2.96672	0.00350928	0.0458953	-2.84847
RPS10P3	-2.12191	1.75995	-3.34013	0.00105919	0.0210124	-1.74521
HNRNPUP1	-2.11957	1.20527	-3.68811	0.000316328	0.00981898	-0.616667
C9orf40	-2.11947	2.97842	-3.46816	0.000685923	0.0158899	-1.34099
AC009563.1	-2.11898	0.90912	-3.82634	0.000191114	0.00709131	-0.142551
EIF2S2P4	-2.11509	0.770475	-3.75623	0.000247188	0.008351	-0.384847
AL023284.1	-2.11263	0.538059	-3.31262	0.00116099	0.0223268	-1.83033
SDHCP4	-2.11241	0.0752486	-2.95146	0.00367715	0.0473302	-2.89111
RPL5P34	-2.11156	2.68052	-3.45619	0.000714736	0.0163382	-1.37935
AP000873.3	-2.10871	0.400858	-2.972	0.00345281	0.045476	-2.83366
MORN2	-2.106	2.07439	-4.15427	5.48735e-05	0.00328283	1.03862
SPC25	-2.10179	4.02958	-4.69897	5.91276e-06	0.000777904	3.16676
RNU6-190P	-2.10129	7.17194	-4.48935	1.42481e-05	0.00138126	2.32416
FAM222A-AS1	-2.09841	0.271712	-3.47157	0.000677929	0.0157514	-1.33006
CTH	-2.09773	0.985422	-4.37754	2.25233e-05	0.00182165	1.88666
SELENOI	-2.09609	6.96501	-3.82642	0.000191062	0.00709131	-0.142291
NCAPG	-2.09564	7.42748	-4.59333	9.24184e-06	0.00103192	2.73851
YBX1P6	-2.09415	0.648959	-2.92935	0.00393346	0.049369	-2.95254
HNRNPKP2	-2.09331	0.679117	-2.97818	0.00338784	0.0448882	-2.81631
STAC2	-2.09258	0.0311453	-3.38313	0.000916586	0.0190354	-1.61089
RPS3AP49	-2.09254	1.53709	-3.03742	0.00281972	0.0400283	-2.64839
HNRNPCP3	-2.08977	0.18007	-3.03111	0.00287573	0.0404339	-2.6664
IFT22	-2.08934	1.32199	-4.03444	8.73062e-05	0.00433069	0.597966
KRT18P20	-2.08671	0.0156411	-2.98992	0.00326756	0.0437253	-2.78328
ARL6IP1P2	-2.08638	0.225113	-4.17897	4.98044e-05	0.00306945	1.13074
AL031429.2	-2.08523	0.084744	-3.34604	0.00103842	0.0207755	-1.72682
RPL17P26	-2.0821	0.409559	-4.46781	1.55721e-05	0.0014583	2.2392
CENPH	-2.08052	6.70422	-3.81572	0.000198751	0.00726983	-0.179481
AC010468.1	-2.07891	1.84873	-3.08663	0.002416	0.0363308	-2.50665
EEF1A1P26	-2.07774	0.415616	-3.13392	0.00207909	0.0329217	-2.36859
EEF1GP8	-2.07369	0.233091	-3.20849	0.00163506	0.0280001	-2.14713
AL031429.1	-2.07352	0.152054	-3.04889	0.0027204	0.0392299	-2.61552
AL162390.1	-2.06814	1.85651	-5.51284	1.52515e-07	6.62083e-05	6.69604
C1QBPP2	-2.06676	1.18866	-3.18466	0.00176632	0.0295259	-2.21839
AC022405.1	-2.06287	0.871778	-3.55921	0.000499989	0.0131016	-1.04571
AC020899.1	-2.06253	1.46158	-2.94218	0.0037828	0.0480773	-2.91695
CLSPN	-2.062	7.77694	-3.86797	0.000163779	0.00648767	0.00303234
RPS3AP36	-2.05787	0.777718	-3.17993	0.00179353	0.0298866	-2.23249
LINC00926	-2.05715	15.9003	-3.73839	0.000263764	0.00867163	-0.445901
AC010409.1	-2.05711	0.335083	-3.20487	0.00165438	0.0282519	-2.15798
C1orf53	-2.05619	0.633659	-3.15457	0.00194606	0.0315811	-2.30771
RPL5P35	-2.05436	0.804699	-5.01548	1.49042e-06	0.000295224	4.49226
GRTP1	-2.05361	1.52548	-2.95122	0.00367976	0.0473459	-2.89176
FAM225B	-2.05263	0.0592685	-3.99671	0.000100851	0.00474239	0.461366
CCNB2	-2.05079	10.1147	-4.1709	5.14094e-05	0.00313608	1.10059
GHRH	-2.0506	0.205239	-3.2752	0.00131424	0.024305	-1.9452
APOO	-2.04425	4.08976	-4.08534	7.17586e-05	0.00380386	0.783912
AC135977.1	-2.04294	0.190462	-2.94807	0.00371543	0.0476161	-2.90056
AL590004.2	-2.03963	0.388011	-3.14192	0.00202657	0.0323729	-2.34504
COL27A1	-2.03887	0.336717	-3.43635	0.000764978	0.0171387	-1.44264
ECT2	-2.03715	5.56945	-4.89408	2.54608e-06	0.000433454	3.97649
MIR4717	-2.03713	0.197618	-2.93094	0.00391441	0.049217	-2.94812
LRRC58	-2.03635	15.9701	-2.96135	0.00356749	0.0464321	-2.86349
RPL36AP51	-2.03318	0.311241	-3.93167	0.000129028	0.00557761	0.228285
MORF4L2	-2.0324	43.8893	-5.50636	1.57242e-07	6.62083e-05	6.66646
GOLGA6A	-2.03007	0.0160072	-3.17092	0.0018464	0.0303836	-2.25927
AC009414.1	-2.02998	0.206193	-3.19234	0.00172301	0.0289843	-2.19549
RNU6-1214P	-2.02775	3.56542	-3.4277	0.000787901	0.017436	-1.47014
RPL4P2	-2.02639	0.489448	-4.00005	9.95745e-05	0.00471049	0.473423
GOLM1	-2.02562	6.03249	-3.96228	0.000114942	0.00515036	0.337595
AC006077.1	-2.02505	0.54744	-4.41552	1.9296e-05	0.00166654	2.03431
AC132942.1	-2.0231	4.05158	-3.39876	0.000869377	0.0184259	-1.56172
PXK	-2.02263	28.272	-3.52476	0.000563929	0.0141419	-1.1582
AC092849.1	-2.02225	1.31494	-3.14768	0.00198956	0.0320322	-2.32807
AL136454.1	-2.02199	5.41859	-3.55226	0.000512303	0.0132667	-1.06847
WDR66	-2.02169	0.270716	-3.08619	0.00241937	0.0363308	-2.50793
AP006296.1	-2.0215	0.62076	-3.00687	0.00310068	0.0423343	-2.73534
NAP1L1P3	-2.0211	0.733188	-3.29131	0.00124608	0.0233545	-1.89588
MGARP	-2.01951	0.112453	-3.5912	0.000446787	0.0122002	-0.940438
CLDN12	-2.01643	1.41193	-4.14672	5.65187e-05	0.00333749	1.01055
EEF1A1P24	-2.01621	2.48824	-3.24722	0.00144091	0.0257048	-2.03034
LRRC19	-2.01568	1.01962	-3.79152	0.000217257	0.00772143	-0.263352
AL451062.2	-2.01508	10.1803	-2.99846	0.00318243	0.0430983	-2.75914
SNORA75	-2.01419	20.5484	-3.39134	0.000891493	0.01874	-1.58508
AC113935.1	-2.0133	7.33214	-2.93514	0.00386482	0.0487714	-2.9365
AC004846.1	-2.01302	0.834622	-4.44629	1.70124e-05	0.00156137	2.15465
AC002550.1	-2.01253	0.0908672	-4.69597	5.9886e-06	0.00078462	3.15453
AC087289.3	-2.01236	0.0579346	-3.69787	0.000305412	0.00965121	-0.583685
PARPBP	-2.01004	4.07728	-3.97559	0.000109286	0.00496957	0.38534
AC021443.1	-2.00954	1.96971	-3.62241	0.000400047	0.0113334	-0.836933
AL139156.1	-2.00858	0.381842	-4.16035	5.35801e-05	0.00323704	1.06129
AC091152.1	-2.0079	1.10627	-4.62445	8.10814e-06	0.00095378	2.86392
BTF3P5	-2.00765	0.769198	-3.07136	0.0025352	0.0373336	-2.55086
MAB21L3	-2.00604	0.110698	-3.00792	0.00309064	0.04226	-2.73237
AC024082.2	-2.00519	0.708655	-2.99667	0.00320016	0.0432288	-2.76422
SNRPFP2	-2.00333	2.45839	-4.36808	2.34052e-05	0.00186736	1.85
AIG1	-2.0015	3.47736	-3.6781	0.000327915	0.010019	-0.650443
KDELC2	-2.00139	7.79368	-5.11434	9.57686e-07	0.000215612	4.91886
BX322784.1	-1.99925	0.141944	-3.91752	0.000136079	0.00576938	0.178001
ESCO2	-1.99842	1.72137	-4.43553	1.77797e-05	0.00159985	2.11249
AL451074.5	-1.99041	0.762347	-4.02069	9.20287e-05	0.00446064	0.548057
AC008802.1	-1.98925	0.49924	-3.48471	0.000647915	0.0153846	-1.28782
AL031121.1	-1.98599	0.0861296	-3.05695	0.00265253	0.0384784	-2.59236
HMGN2P7	-1.98411	0.609405	-3.32146	0.00112731	0.0218949	-1.80304
EXO1	-1.9833	4.24911	-3.55239	0.000512077	0.0132667	-1.06805
TPX2	-1.98119	20.5802	-4.17259	5.10691e-05	0.00312297	1.1069
AC008543.3	-1.97946	1.0081	-3.5389	0.000536801	0.0137017	-1.11213
PKD2L2	-1.97916	1.59724	-3.6053	0.000425064	0.0117819	-0.893762
MNS1	-1.97834	2.0665	-4.73608	5.04607e-06	0.000693912	3.31891
RPS20P2	-1.97775	0.688661	-4.13296	5.96394e-05	0.00343029	0.959505
SERBP1P1	-1.97661	0.571303	-3.25308	0.00141346	0.0254041	-2.01255
AL672212.1	-1.9764	0.280762	-2.96987	0.00347546	0.045664	-2.83963
AP002812.1	-1.97632	6.0457	-4.61484	8.44297e-06	0.000973887	2.82514
AC099335.1	-1.97589	0.889166	-2.92918	0.00393545	0.049369	-2.953
RPSAP28	-1.97503	0.133647	-3.42695	0.000789904	0.0174527	-1.4725
AL136097.2	-1.9743	1.21657	-4.27279	3.43423e-05	0.00241003	1.48446
AC107075.1	-1.9734	3.64167	-3.54304	0.0005291	0.0135365	-1.09863
RPL31P2	-1.97291	0.745778	-4.12944	6.04624e-05	0.00345601	0.94649
AL109976.1	-1.97148	0.282468	-4.20008	4.58313e-05	0.00292932	1.20979
AC239600.2	-1.96971	0.101608	-3.38113	0.000922801	0.0191213	-1.61717
MVB12B	-1.96895	4.54007	-3.2252	0.00154851	0.0269615	-2.0969
ELL3	-1.9631	0.373311	-3.2966	0.00122443	0.0230978	-1.87964
MPHOSPH6	-1.96244	7.92724	-3.7447	0.000257781	0.00858632	-0.424322
AP002433.1	-1.96064	1.04974	-3.69612	0.000307346	0.00968809	-0.589614
USH1C	-1.95888	0.00510118	-3.31621	0.00114721	0.022172	-1.81926
HMGB1P5	-1.9588	14.2345	-3.24637	0.00144492	0.0257596	-2.0329
KIF20A	-1.95643	6.16304	-4.41547	1.92999e-05	0.00166654	2.03412
BTF3P6	-1.9541	1.56431	-3.0958	0.00234696	0.0355841	-2.48002
RPS23P8	-1.95384	20.2083	-2.94242	0.00378	0.0480577	-2.91627
AC090651.1	-1.95331	0.249142	-3.46726	0.000688057	0.0159197	-1.34388
NDC80	-1.95196	5.16241	-4.56824	1.02657e-05	0.00111179	2.63788
SHCBP1	-1.95173	5.23749	-3.42967	0.000782634	0.0173817	-1.46389
AC104563.1	-1.95146	1.1763	-3.12874	0.00211372	0.0332926	-2.38379
SGO1	-1.95096	3.68371	-4.23748	3.95253e-05	0.00266884	1.35063
NTNG2	-1.9507	17.2216	-3.16579	0.00187717	0.0307523	-2.27451
LONRF3	-1.95064	2.55461	-3.19453	0.0017108	0.0288926	-2.18893
AC093166.2	-1.9471	0.164697	-3.74066	0.0002616	0.00864564	-0.438151
AC023043.4	-1.945	0.249634	-3.51733	0.000578684	0.0143395	-1.18233
RPSAP4	-1.94394	0.522285	-3.03136	0.00287353	0.0404134	-2.6657
SOX13	-1.9437	0.748858	-3.73809	0.000264047	0.0086727	-0.446908
FSIP1	-1.94182	0.275806	-3.93181	0.00012896	0.00557761	0.22878
AC026771.1	-1.94135	4.44611	-3.24805	0.00143697	0.0256677	-2.02781
BZW1P2	-1.94059	1.46089	-3.98298	0.000106259	0.00488022	0.411917
GNG5P2	-1.94007	0.447441	-3.17803	0.00180456	0.0299728	-2.23814
FAM72B	-1.93858	0.848876	-3.24531	0.00144995	0.0258326	-2.03612
AC093677.1	-1.93833	0.0812044	-3.14777	0.001989	0.0320322	-2.32781
MIR1291	-1.93801	2.7526	-4.65484	7.13127e-06	0.000873415	2.98701
MAD2L1	-1.93793	4.86457	-4.66931	6.70733e-06	0.000838933	3.04579
CETN2	-1.93435	7.24543	-4.78577	4.07581e-06	0.000604349	3.52402
HSP90AA2P	-1.93348	1.00029	-3.41003	0.000836747	0.0180814	-1.52613
SERBP1P6	-1.93256	0.202062	-3.83336	0.000186224	0.00701632	-0.118114
RPL19P21	-1.931	1.18044	-4.04754	8.30239e-05	0.00420525	0.645632
RPL23AP2	-1.93027	1.90841	-3.3446	0.00104346	0.0208461	-1.73132
NDUFAF4	-1.92825	4.67872	-4.02581	9.02422e-05	0.00440112	0.566628
FOSL1P1	-1.92795	1.22654	-3.11748	0.00219097	0.034021	-2.41681
SUMO2P20	-1.9278	0.124939	-3.97467	0.000109667	0.00497872	0.38204
AC123567.1	-1.92683	0.041993	3.49261	0.000630456	0.0150869	-1.26233
PLK4	-1.92665	6.80315	-4.24169	3.88694e-05	0.00265018	1.36655
AL590135.1	-1.92627	1.31115	-3.07856	0.00247831	0.036845	-2.53003
AL591684.2	-1.92619	1.42948	-3.87103	0.000161923	0.00644873	0.0137926
RNY4P23	-1.92609	0.720958	-3.40108	0.000862575	0.0183507	-1.55441
ICA1L	-1.92466	2.62157	-4.0056	9.74891e-05	0.00465173	0.493465
AC018553.1	-1.92355	1.21787	-2.97604	0.00341022	0.0450766	-2.82232
AL158206.1	-1.92197	1.13224	-4.56871	1.02455e-05	0.00111179	2.63976
KPNA2	-1.92034	28.7963	-4.9205	2.26765e-06	0.000404795	4.08796
SNORA36C	-1.91954	0.780027	-4.69201	6.09063e-06	0.000792342	3.13832
RPL7P24	-1.91937	0.772037	-3.78262	0.000224457	0.00787496	-0.294057
TUBAP2	-1.91854	1.52225	-3.62378	0.000398118	0.0112962	-0.832402
SETP14	-1.9182	1.40825	-3.61223	0.000414765	0.0115874	-0.870787
RPL13AP7	-1.91516	2.92082	-3.29632	0.00122558	0.0231118	-1.88051
SGO2	-1.91416	4.71911	-4.92654	2.20829e-06	0.000402004	4.1135
SUB1P4	-1.91391	1.00184	-3.2548	0.00140552	0.0253121	-2.00734
RNA5SP311	-1.91341	10.4623	-3.86308	0.000166786	0.0065572	-0.0141342
RPS7P10	-1.91257	1.96659	-3.04564	0.00274818	0.0395582	-2.62484
RNU6-553P	-1.91215	5.05192	-3.73328	0.000268697	0.00878544	-0.463322
FRMD5	-1.91096	1.27683	-3.69054	0.000313581	0.00977249	-0.608477
RNU7-170P	-1.90962	5.58799	-3.64634	0.000367389	0.0106657	-0.757095
BEST2	-1.90892	0.211337	-3.47532	0.000669226	0.0156084	-1.318
ASPM	-1.90844	6.40887	-3.01857	0.00299017	0.0414097	-2.70213
HSP90B1	-1.90728	135.323	-5.76807	4.50142e-08	2.69885e-05	7.8803
HNRNPLP2	-1.90701	1.40793	-4.13822	5.8427e-05	0.00340302	0.979012
MDH1	-1.90627	16.3019	-3.2602	0.00138077	0.0250863	-1.9909
DDIAS	-1.90463	2.14802	-2.99358	0.00323084	0.0435083	-2.77295
AC009145.4	-1.90095	1.06486	-3.20839	0.00163561	0.0280007	-2.14744
AC021739.1	-1.90052	0.525764	-3.14707	0.00199341	0.0320649	-2.32985
AL359704.1	-1.89972	0.768354	-3.00908	0.00307953	0.0421394	-2.72908
PHYH	-1.89871	3.95139	-4.75057	4.74216e-06	0.000668985	3.37856
AL358472.1	-1.89591	2.31936	-3.49278	0.000630097	0.0150869	-1.2618
RNU7-113P	-1.89412	5.26911	-4.05315	8.12511e-05	0.00414975	0.666092
PRPS2	-1.89309	17.3454	-5.34162	3.39373e-07	0.000106358	5.92142
AP003170.5	-1.89184	0.747164	-4.0782	7.37692e-05	0.00386057	0.757698
PRDX3P2	-1.89132	3.92717	-3.31068	0.00116851	0.0224111	-1.83632
RPL4P1	-1.89076	0.517034	-3.02492	0.00293169	0.0409493	-2.68405
AC113143.1	-1.89036	1.57608	-5.37429	2.91686e-07	9.82895e-05	6.06796
HNRNPA1P10	-1.88972	1.1208	-3.12026	0.00217164	0.0338472	-2.40866
RPL4P4	-1.88896	12.8789	-3.47927	0.000660174	0.0155087	-1.3053
AC087721.1	-1.88266	1.12196	-4.02814	8.94412e-05	0.00438493	0.575075
AC108860.1	-1.87517	0.110571	-2.92686	0.00396327	0.0495294	-2.95942
GPR88	-1.87425	0.620937	-3.52803	0.000557534	0.0140297	-1.14755
UBXN8	-1.87409	3.36551	-5.10451	1.001e-06	0.000224448	4.87617
CLEC11A	-1.87163	173.119	-3.53865	0.000537266	0.0137072	-1.11295
NEK2	-1.87138	2.9763	-3.59765	0.000436723	0.0120026	-0.919105
MPO	-1.87	2036.82	-4.14989	5.58206e-05	0.00331076	1.02236
DSTN	-1.86422	12.1738	-3.97914	0.000107821	0.00491511	0.398109
LARP1B	-1.86343	4.5629	-4.61932	8.28538e-06	0.00096514	2.8432
RPS27AP8	-1.86252	4.97069	-4.37347	2.2899e-05	0.00183588	1.87087
FAM72C	-1.86092	0.229614	-3.69053	0.00031359	0.00977249	-0.608503
RPS3AP3	-1.86089	3.21996	-3.17871	0.0018006	0.0299515	-2.23611
AGAP13P	-1.85981	6.01441	-3.90069	0.000144946	0.00602946	0.118365
MTND2P12	-1.85977	0.103751	-3.075	0.0025063	0.0370929	-2.54034
GINS1	-1.8589	5.25898	-3.43369	0.00077196	0.0172671	-1.4511
SNORD91B	-1.85625	1.84106	-4.19453	4.68451e-05	0.00297004	1.18898
AC090686.1	-1.85604	0.678727	-3.27516	0.00131442	0.024305	-1.94532
MMP14	-1.85595	4.88065	-3.40798	0.000842609	0.0181411	-1.53262
RAB23	-1.85507	0.425083	-4.06121	7.87661e-05	0.00404154	0.695541
B3GALNT1P1	-1.85446	4.89064	-3.79021	0.000218302	0.00774363	-0.267874
DTL	-1.85273	9.80663	-3.08802	0.00240544	0.0362419	-2.50263
AL645949.1	-1.85031	0.361017	-4.27878	3.35298e-05	0.00236505	1.50727
MRPL33	-1.85022	22.0293	-3.17093	0.00184632	0.0303836	-2.25923
RPL22P12	-1.84951	1.06507	-2.92636	0.00396928	0.0495567	-2.9608
AC099654.3	-1.84895	0.0909178	-2.99044	0.00326224	0.0436964	-2.78179
RPS24P8	-1.84816	2.14327	-3.03854	0.00280982	0.0399245	-2.64516
PPIAP72	-1.84807	13.0977	-4.55881	1.0678e-05	0.00113448	2.60017
TASP1	-1.84702	4.89492	-3.32562	0.00111181	0.02167	-1.79019
CDH24	-1.84614	2.53228	-3.13857	0.00204841	0.0325713	-2.35491
SYCE2	-1.84517	3.06603	-3.56512	0.000489717	0.0129307	-1.0263
COLGALT2	-1.84459	0.627572	-3.40069	0.000863691	0.0183648	-1.55561
SLC39A11	-1.84451	11.643	-5.38257	2.80679e-07	9.73709e-05	6.10519
RNU2-50P	-1.84443	0.655959	-3.35599	0.00100434	0.0202702	-1.69584
MCM10	-1.84396	4.15005	-3.43748	0.000762029	0.0170934	-1.43904
HJURP	-1.84257	6.46977	-3.63566	0.000381651	0.0109815	-0.792807
AC112656.1	-1.84245	0.0872771	-3.74138	0.000260912	0.00863844	-0.435676
UBE2C	-1.84133	14.8328	-2.93013	0.00392405	0.0492933	-2.95036
HADHAP1	-1.83996	0.104103	-3.54697	0.000521878	0.0134077	-1.08578
TMEM52	-1.8398	0.186185	-3.19655	0.00169967	0.0287495	-2.1829
AC104837.1	-1.83977	0.181482	-3.75545	0.00024789	0.00836805	-0.387518
MIR1537	-1.83817	10.1053	-3.03894	0.00280637	0.039922	-2.64404
RPS7P11	-1.83731	6.40082	-4.41391	1.94236e-05	0.00166735	2.02802
SUB1P3	-1.83705	1.01594	-3.8753	0.000159368	0.00637875	0.0288041
AC097468.3	-1.83673	2.71447	-3.01908	0.00298545	0.0413866	-2.70069
ARL4D	-1.83429	0.419406	-3.74723	0.000255415	0.00854362	-0.415648
MT1F	-1.83318	1.58858	-4.64036	7.58174e-06	0.000919123	2.92827
HADHAP2	-1.83152	0.221787	-3.21774	0.00158657	0.0274251	-2.11933
CENPI	-1.83146	2.94599	-3.82957	0.000188849	0.00705261	-0.131309
FANCD2OS	-1.831	0.488937	-2.99969	0.00317037	0.0430514	-2.75567
MIS18A	-1.83062	7.3275	-3.65121	0.000361063	0.0105818	-0.740803
AC104763.3	-1.83059	7.06657	-3.42868	0.00078526	0.017409	-1.46701
RPSAP54	-1.82994	1.46356	-3.06782	0.00256355	0.0375843	-2.56106
STMN1	-1.82871	45.5876	-4.07868	7.36324e-05	0.00385706	0.759459
CACYBPP2	-1.82757	0.564943	-3.72571	0.000276175	0.00897145	-0.48913
AC007996.1	-1.82658	0.70038	-4.04193	8.48326e-05	0.00425776	0.625205
AC090229.1	-1.82587	1.24815	-3.74333	0.000259073	0.00860045	-0.429024
CALR	-1.82551	443.245	-4.46934	1.54738e-05	0.00145157	2.24525
EFEMP2	-1.82456	1.84704	-3.16612	0.00187514	0.0307281	-2.27351
VRK1	-1.82423	10.4496	-4.10131	6.74538e-05	0.0036875	0.842613
DYNC2LI1	-1.82372	2.59719	-3.07647	0.0024947	0.0369708	-2.53608
CDC42EP4	-1.82346	1.95145	-3.35943	0.000992787	0.020099	-1.68509
GOLGA2P4	-1.82319	0.693521	-3.14769	0.00198946	0.0320322	-2.32803
AC108727.1	-1.82116	3.66896	-3.89024	0.000150723	0.00617205	0.0814522
AL121916.1	-1.82069	0.224722	-3.15767	0.0019268	0.0313696	-2.29855
AP001318.3	-1.8196	7.99695	-2.99698	0.00319702	0.0432111	-2.76332
RNU6-32P	-1.81816	5.23556	-3.20443	0.00165675	0.0282565	-2.1593
RPL7AP11	-1.814	1.95344	-3.37965	0.000927432	0.0191994	-1.62182
GPD1L	-1.81381	6.10527	-3.55296	0.000511058	0.0132532	-1.06619
RPSAP8	-1.81314	0.477721	-3.06132	0.00261644	0.0380893	-2.5798
CDC25A	-1.81181	4.56663	-2.98207	0.00334757	0.044483	-2.80538
XPOTP1	-1.81121	0.144162	-4.106	6.62358e-05	0.00364621	0.859907
AC009501.1	-1.81077	0.71744	-3.30547	0.00118892	0.0226781	-1.85237
AL353795.3	-1.80765	1.27943	-3.54725	0.000521362	0.0134069	-1.08486
AC024884.2	-1.80373	0.337112	-3.73028	0.00027164	0.00885543	-0.473564
RPS27AP1	-1.80341	0.794762	-3.456	0.000715206	0.0163422	-1.37996
AL513548.3	-1.80316	0.0959796	-3.29112	0.00124686	0.0233613	-1.89646
NUSAP1	-1.80163	23.1917	-4.20985	4.40973e-05	0.00287106	1.24647
RAD51AP1	-1.80042	8.23216	-3.62501	0.000396375	0.0112653	-0.82829
CDC7	-1.79932	8.96298	-3.23086	0.00152013	0.026629	-2.07981
AC074367.1	-1.79893	1.58586	-3.19041	0.00173378	0.0291299	-2.20124
RPS13P2	-1.79873	8.69079	-3.99948	9.97922e-05	0.00471674	0.471356
AL512844.2	-1.79764	0.0971558	-3.04617	0.00274365	0.0395239	-2.62332
EEF1A1P10	-1.79732	3.00217	-3.07384	0.00251549	0.0371947	-2.5437
SRGN	-1.79576	1566.19	-3.42167	0.000804273	0.0176803	-1.48928
MANF	-1.79403	18.3637	-4.35318	2.48606e-05	0.00194136	1.79245
RPL34P18	-1.79352	2.48014	-3.23739	0.00148803	0.0262691	-2.06009
AC135507.1	-1.79314	3.82414	-3.75919	0.000244533	0.00830042	-0.374686
KIF23	-1.79259	5.0195	-3.61054	0.000417246	0.0116296	-0.876374
ZNF367	-1.78917	6.79485	-4.31763	2.86933e-05	0.0021592	1.65571
CENPF	-1.78865	9.61014	-4.20558	4.48475e-05	0.00289119	1.23043
CEP55	-1.78788	5.24474	-4.47466	1.51385e-05	0.0014397	2.26619
AC010323.2	-1.78693	0.578367	-3.30785	0.00117955	0.0225992	-1.84504
STIL	-1.78665	4.80246	-4.4374	1.76435e-05	0.00159541	2.11984
TPT1P4	-1.7857	4.7379	-3.38716	0.000904199	0.0189134	-1.59824
AC087359.1	-1.78402	0.987645	-4.63083	7.89281e-06	0.000938257	2.88972
AC005019.1	-1.78331	0.669995	-3.25731	0.00139396	0.025207	-1.9997
AC005736.1	-1.78138	0.386311	-3.86134	0.000167869	0.00657625	-0.0202398
GLMN	-1.78094	9.46575	-4.10508	6.64737e-05	0.00365566	0.856504
AC010618.1	-1.78043	0.206134	-3.7771	0.000229042	0.00797082	-0.313094
BRIP1	-1.78041	4.24888	-3.57105	0.000479633	0.0127931	-1.00683
RPS20P14	-1.77502	4.88838	-3.12325	0.00215104	0.0335926	-2.39989
KCNJ14	-1.77488	1.69296	-4.08085	7.30162e-05	0.00383571	0.76743
RNY4P6	-1.7728	14.159	-3.53829	0.000537943	0.0137118	-1.11412
RPL7AP7	-1.7698	0.137357	-3.31547	0.00115004	0.0222034	-1.82154
RFC3	-1.76753	8.95468	-3.30362	0.00119627	0.0227614	-1.85808
RN7SL233P	-1.76718	1.48418	-3.58885	0.0004505	0.0122591	-0.948186
OSTC	-1.76683	41.8537	-6.09379	9.05879e-09	7.93133e-06	9.44003
CYCS	-1.76594	15.7276	-5.44405	2.10709e-07	8.10466e-05	6.38285
SPDL1	-1.76553	4.1277	-3.77481	0.000230969	0.00800252	-0.320979
MTHFD2P7	-1.76428	0.0983128	-4.29842	3.09946e-05	0.00225545	1.58218
EEF1A1P38	-1.76366	2.03696	-2.93596	0.00385514	0.0487087	-2.93422
BRI3BP	-1.76219	11.3483	-3.3336	0.00108256	0.0212979	-1.76545
RPL39P18	-1.76196	1.05274	-3.04139	0.00278497	0.0398425	-2.63702
RNU6-1112P	-1.76137	4.90633	-4.37018	2.32065e-05	0.00185514	1.85814
C3orf33	-1.75941	1.85838	-3.86126	0.000167918	0.00657625	-0.0205169
UAP1	-1.75796	6.97593	-4.37975	2.23224e-05	0.00181524	1.89521
CHAC2	-1.75741	3.30867	-3.03239	0.00286429	0.0403967	-2.66275
OR6V1	-1.75488	0.0482007	-3.65641	0.00035442	0.0104599	-0.723386
AL391058.1	-1.75364	0.578429	-3.52222	0.000568937	0.0141982	-1.16646
CENPL	-1.75347	2.48053	-5.37776	2.87028e-07	9.82895e-05	6.08354
LINC01572	-1.75205	1.49382	-3.24268	0.00146251	0.0259977	-2.0441
AC067942.1	-1.75039	0.676897	-3.35523	0.00100692	0.0203021	-1.69822
MTUS2-AS1	-1.74959	0.165591	-3.7425	0.000259856	0.00861899	-0.431861
ECM2	-1.74899	3.89515	-3.35938	0.000992944	0.020099	-1.68524
AL138847.1	-1.74859	0.695113	-3.55519	0.000507083	0.0132097	-1.05889
CKAP2L	-1.74721	4.05126	-3.44256	0.000748895	0.0169227	-1.42285
AL138759.1	-1.74609	1.06845	-4.12864	6.06509e-05	0.00346319	0.943534
SPCS2P4	-1.74561	1.00741	-4.55729	1.07459e-05	0.00113768	2.5941
LRP11	-1.74531	2.18458	-3.24749	0.00143962	0.0256945	-2.02951
MTCO1P25	-1.74527	0.158838	-3.59426	0.000441986	0.0121171	-0.930323
RPL7	-1.74522	249.47	-2.95795	0.0036048	0.0467523	-2.87298
DUTP2	-1.74483	6.09559	-3.6253	0.000395966	0.0112653	-0.827323
AGAP9	-1.74284	9.51004	-3.38062	0.000924389	0.019147	-1.61877
RPL23AP65	-1.74282	2.20544	-3.01586	0.00301543	0.0416615	-2.70983
RPS3AP12	-1.74236	0.914724	-3.67652	0.000329781	0.0100444	-0.655769
PPIAP11	-1.74188	2.44756	-3.45736	0.000711865	0.0163064	-1.3756
YWHAZP5	-1.7405	0.437377	-3.11375	0.00221708	0.0342458	-2.4277
DBF4P1	-1.74047	0.149304	-4.11726	6.33999e-05	0.00356117	0.901446
AC018645.2	-1.74037	6.25567	-5.3986	2.60512e-07	9.21126e-05	6.17738
DPY19L1P2	-1.73784	0.968013	-2.99303	0.00323636	0.0435507	-2.77451
RNU6-529P	-1.73687	2.04145	-3.44066	0.00075379	0.0169777	-1.42892
ACSM3	-1.73669	12.7583	-4.53709	1.16898e-05	0.00120749	2.5135
AC005840.1	-1.732	2.55337	-3.69103	0.000313023	0.00977139	-0.606804
PACSIN3	-1.73128	0.672183	-4.90481	2.42922e-06	0.000422692	4.02171
C20orf144	-1.73089	0.397791	-3.0315	0.00287223	0.0404134	-2.66529
AC022173.1	-1.7308	1.06519	-3.04781	0.00272962	0.0393321	-2.61863
RPS7P14	-1.72936	0.479629	-3.41173	0.000831927	0.0180166	-1.52075
AC016691.1	-1.72933	0.580393	-4.27745	3.37082e-05	0.00236855	1.50221
SNORA2A	-1.72744	3.47356	-3.36618	0.000970517	0.0197897	-1.66402
RPL24P2	-1.72653	1.49387	-3.00034	0.00316399	0.0429964	-2.75383
PPIAP66	-1.72576	0.223759	-3.65904	0.000351101	0.0104176	-0.714559
HMGB1P49	-1.72567	0.154465	-3.05849	0.00263979	0.0383584	-2.58795
PRC1-AS1	-1.72164	2.6971	-4.8888	2.60556e-06	0.000442216	3.95426
MRPL1	-1.72148	11.5066	-3.54973	0.000516869	0.0133474	-1.07676
UBE2T	-1.71713	11.2529	-2.99849	0.00318216	0.0430983	-2.75906
NPM1P51	-1.71606	0.167489	-3.0263	0.00291911	0.0408238	-2.68011
STPG1	-1.71518	0.845419	-4.86175	2.93213e-06	0.000485685	3.84066
CCDC150	-1.71495	0.685763	-4.13847	5.83698e-05	0.00340302	0.979943
KIF4A	-1.714	4.52547	-3.95694	0.000117291	0.0052269	0.318463
AL122001.1	-1.71336	2.55798	-3.73841	0.000263746	0.00867163	-0.445836
RNU6-757P	-1.71336	2.95302	-3.45964	0.000706315	0.0161994	-1.3683
BIRC5	-1.71093	6.05311	-3.82104	0.00019489	0.00717546	-0.160994
KIF15	-1.71023	5.12086	-4.02854	8.93018e-05	0.00438493	0.576553
ATP6V1C2	-1.70752	1.34457	-3.98301	0.00010625	0.00488022	0.411995
AL023581.2	-1.707	0.150098	-3.64928	0.000363558	0.0106103	-0.747264
TTC25	-1.706	2.02846	-5.23022	5.6631e-07	0.000150178	5.42626
TIMM17A	-1.70466	12.3093	-5.16055	7.77355e-07	0.000188062	5.12026
GINS4	-1.70446	2.46752	-3.69166	0.000312318	0.00976624	-0.604685
CNOT10-AS1	-1.70299	1.61515	-3.42703	0.000789714	0.0174527	-1.47228
PRPH2	-1.70167	0.64915	-3.18764	0.00174939	0.0293418	-2.20951
SPINK4	-1.70081	1.43928	-3.66721	0.000340978	0.0102514	-0.687108
ZWINT	-1.70059	14.4866	-3.37401	0.000945255	0.0194477	-1.63951
PPIAP80	-1.70034	0.161967	-3.63318	0.000385026	0.0110527	-0.801062
PSMA6P2	-1.70014	0.365914	-4.20842	4.43472e-05	0.00287106	1.2411
RDH10	-1.69866	1.19639	-3.05823	0.00264196	0.0383696	-2.5887
TUBBP2	-1.69796	0.567981	-3.7228	0.000279102	0.00904522	-0.499039
AC141002.1	-1.69675	2.14991	-3.23379	0.00150564	0.0264489	-2.07096
AL158825.2	-1.69667	2.18343	-4.13397	5.94042e-05	0.00342809	0.963259
CERS1	-1.69666	0.297295	-4.90837	2.3916e-06	0.000418788	4.03673
HNRNPA1P37	-1.69619	0.640261	-2.94701	0.0037274	0.0477029	-2.90349
MIR100HG	-1.69606	0.892469	-3.10395	0.00228714	0.0350337	-2.4563
AC026410.2	-1.69552	1.44142	-3.62878	0.000391096	0.0111948	-0.815724
AL049647.1	-1.69539	2.40262	-3.73309	0.000268885	0.00878641	-0.463982
RPS18P12	-1.69518	10.2155	-3.03541	0.00283744	0.040158	-2.65413
AC007688.1	-1.69493	1.80732	-4.03757	8.62623e-05	0.00430991	0.609366
AC004000.1	-1.69487	5.37956	-3.62207	0.000400542	0.0113416	-0.838091
RPL34P27	-1.69062	1.82483	-3.04969	0.00271358	0.0391725	-2.61322
HMGN2P17	-1.68856	2.98664	-3.65314	0.000358584	0.010532	-0.734342
PRMT5-AS1	-1.68562	0.799808	-2.92561	0.00397834	0.0496362	-2.96288
OGN	-1.68514	3.07523	-3.81962	0.00019592	0.00719968	-0.165959
RAD54B	-1.68492	0.778663	-3.53311	0.000547748	0.0138339	-1.131
DEPDC4	-1.68479	0.787384	-3.11934	0.00217797	0.0338973	-2.41133
TGM6	-1.68455	0.0125846	-3.68533	0.000319514	0.00988552	-0.626077
MIR548AA1	-1.6841	13.3127	-3.93693	0.000126494	0.00550694	0.24703
AC087623.3	-1.68235	0.567598	-3.09786	0.00233173	0.035451	-2.47404
CKAP2	-1.68102	17.2849	-3.9399	0.000125088	0.00546879	0.257603
AC004890.1	-1.68077	2.07953	-3.03197	0.00286801	0.0404134	-2.66394
KDM4A-AS1	-1.68052	2.30647	-3.49697	0.000621019	0.014971	-1.24825
ZNF22	-1.67872	17.278	-3.93904	0.000125491	0.00547621	0.254562
BLM	-1.67867	7.55703	-3.0098	0.00307264	0.0420869	-2.72703
MORN3	-1.67834	1.88749	-3.31723	0.00114335	0.0221128	-1.81613
HMGB1P6	-1.67527	13.3046	-3.10162	0.00230408	0.0352247	-2.46308
PLA2G12AP1	-1.6747	0.70488	-3.09572	0.00234759	0.0355841	-2.48027
FAM71D	-1.67249	0.192342	-3.3976	0.00087281	0.0184528	-1.56538
AC027309.2	-1.67181	7.5926	-3.19995	0.00168101	0.0285301	-2.17272
AC091152.2	-1.67122	0.139197	-3.41981	0.00080938	0.0177318	-1.49518
CTSG	-1.66851	212.562	-3.77678	0.000229309	0.00797507	-0.31419
AC048380.2	-1.6648	0.774971	-4.2168	4.29013e-05	0.00282386	1.27263
LRR1	-1.6648	5.38073	-4.53009	1.20347e-05	0.00123287	2.48567
AC018766.1	-1.66321	2.80649	-4.63197	7.85493e-06	0.000935788	2.89434
MTND6P18	-1.66158	2.97985	-3.00951	0.00307542	0.042104	-2.72786
AC084033.3	-1.66072	25.9939	-3.1981	0.00169115	0.0286669	-2.17827
LYST	-1.65771	27.8258	-3.46456	0.000694466	0.0160142	-1.35253
RPL34P1	-1.65668	0.367146	-3.17988	0.00179379	0.0298866	-2.23262
EEF1A1P4	-1.65668	4.895	-2.94207	0.00378409	0.0480826	-2.91726
HNRNPA3P8	-1.65581	0.126289	-3.69608	0.000307382	0.00968809	-0.589726
BUB1B	-1.65554	9.34045	-3.42753	0.000788363	0.017436	-1.47068
RNU2-68P	-1.65519	5.31824	-3.26184	0.00137336	0.0249845	-1.98592
AL035461.2	-1.65418	2.02484	-3.02713	0.00291165	0.0407836	-2.67777
AL645608.3	-1.65373	0.249062	-3.41789	0.000814684	0.0178039	-1.50126
RNU6-323P	-1.65232	2.26491	-4.07333	7.51709e-05	0.00391165	0.739845
RNU6-615P	-1.65056	1.38192	-3.54439	0.000526611	0.0135147	-1.09422
AK4	-1.64662	1.96107	-3.41637	0.0008189	0.0178325	-1.50606
AC112512.1	-1.64632	4.28958	-4.2341	4.00591e-05	0.0026881	1.33786
HMGN2P15	-1.64529	0.328612	-3.89449	0.000148347	0.00612934	0.0964604
SETD9	-1.64493	2.86031	-4.17447	5.06941e-05	0.00310904	1.11391
AC007731.1	-1.64447	0.35559	-3.262	0.00137265	0.0249799	-1.98545
AC092991.1	-1.64226	0.601993	-3.48685	0.000643139	0.0152975	-1.28091
RBL1	-1.64162	9.56725	-3.84389	0.000179104	0.0068309	-0.0813547
AC008937.2	-1.64132	6.67134	-3.46232	0.000699841	0.0161045	-1.35971
AL354872.2	-1.64062	0.153521	-2.95632	0.00362284	0.046898	-2.87754
NCAPH	-1.63896	7.58514	-3.40382	0.00085457	0.0183057	-1.54574
VTRNA1-1	-1.63783	0.611798	-3.06648	0.00257435	0.0376754	-2.56492
AC099340.1	-1.63695	1.62567	-4.34012	2.62081e-05	0.0020162	1.7421
AC016949.1	-1.63633	5.11088	-4.43443	1.78597e-05	0.00160443	2.1082
AR	-1.63621	1.28765	-2.95899	0.00359338	0.0466528	-2.87009
SH3D19	-1.63448	2.99436	-3.42301	0.000800609	0.017622	-1.48503
KLHL25	-1.63365	0.550678	-3.25843	0.00138885	0.025142	-1.9963
AC092718.2	-1.6325	0.593515	-3.8457	0.000177907	0.00683084	-0.0750273
RPL34P6	-1.63245	0.648705	-3.40543	0.000849915	0.0182414	-1.54065
AP000350.7	-1.63206	0.178516	-3.22618	0.00154355	0.0269219	-2.09394
CENPU	-1.63106	16.1912	-3.27022	0.00133598	0.0245556	-1.96039
TAF1B	-1.62983	4.58048	-4.63754	7.67255e-06	0.000926061	2.91686
AC092569.1	-1.62965	0.0988052	-3.69002	0.000314163	0.0097801	-0.610218
MTHFD2	-1.62938	14.3128	-5.30246	4.06619e-07	0.000117428	5.74653
TUBAP	-1.62565	0.0578049	-3.31432	0.00115445	0.0222573	-1.82509
SPAG5	-1.62342	10.045	-3.68008	0.000325594	0.00997746	-0.643774
AL445669.1	-1.62287	0.545755	-3.33383	0.00108173	0.0212945	-1.76475
AC002400.1	-1.62229	5.81315	-3.18725	0.00175158	0.0293663	-2.21066
KDM5C-IT1	-1.62122	0.814512	-3.80573	0.000206204	0.00745348	-0.214169
AL133380.1	-1.6207	0.0954032	3.16709	0.00186933	0.0306801	-2.27064
TCFL5	-1.62062	4.48445	-3.88587	0.000153205	0.00622572	0.0660333
TPT1P3	-1.61896	0.572517	-3.07603	0.00249813	0.0369918	-2.53734
TIMM21	-1.61866	3.36717	-3.45322	0.000722049	0.0164576	-1.38883
AC005262.1	-1.61805	1.02536	-3.4759	0.000667891	0.0156084	-1.31614
BUB1	-1.61772	8.00553	-3.68116	0.000324335	0.00995548	-0.640138
AC079328.1	-1.61645	0.55522	-4.63541	7.74168e-06	0.000930334	2.90826
SSR3	-1.61415	24.4148	-4.12966	6.04113e-05	0.00345601	0.947294
CHRNB1	-1.61021	2.41981	-4.22032	4.23086e-05	0.00279151	1.28587
UQCRH	-1.60981	55.3399	-3.90441	0.000142939	0.005973	0.131536
AC074117.2	-1.60849	1.22747	-3.07788	0.00248364	0.0368663	-2.532
RPS7P1	-1.60769	13.5344	-3.08167	0.00245413	0.0366551	-2.52103
SNORD3J	-1.60728	0.314986	-3.04027	0.00279475	0.0398765	-2.64024
AC092473.1	-1.60548	0.222825	-4.19565	4.6638e-05	0.00296371	1.1932
AC079316.2	-1.60494	9.66033	-3.0222	0.00295665	0.041173	-2.69181
AC011498.1	-1.60354	0.606494	-3.0426	0.00277445	0.0397702	-2.63355
COQ3	-1.6028	2.4094	-2.92822	0.00394697	0.0493957	-2.95567
AC106028.2	-1.60252	1.97527	-3.8569	0.000170665	0.00665638	-0.0358247
CENPW	-1.60138	7.7753	-4.89882	2.49385e-06	0.0004272	3.99643
AK6	-1.60019	7.27006	-4.81579	3.5799e-06	0.000551575	3.64871
CENPN	-1.5984	3.88047	-3.92148	0.00013407	0.00570614	0.192054
PPIAP42	-1.59676	6.85185	-3.97704	0.000108687	0.0049505	0.390539
RPSAP46	-1.59665	0.534718	-4.39123	2.13047e-05	0.0017698	1.93975
RNU6-59P	-1.5948	2.31676	-4.05252	8.14474e-05	0.00415209	0.663804
RNU6-118P	-1.59333	23.0133	-3.49866	0.000617404	0.0149039	-1.2428
AC011466.2	-1.59204	1.32314	-3.1223	0.00215758	0.0336757	-2.40268
NDUFB5	-1.59159	8.23985	-3.69511	0.000308466	0.00970181	-0.593031
EFCAB11	-1.59109	0.998135	-3.50686	0.000600099	0.0146012	-1.21626
CST7	-1.59067	169.8	-3.65873	0.000351491	0.010418	-0.715598
NDUFC2	-1.59028	8.09122	-5.28635	4.37903e-07	0.000121991	5.67485
AC091492.1	-1.59002	1.48785	-3.12927	0.00211019	0.033256	-2.38225
MELK	-1.58491	5.99777	-4.35439	2.47396e-05	0.00193562	1.7971
MZT1	-1.58479	8.5825	-4.61812	8.32724e-06	0.00096514	2.83837
BANF1P1	-1.58366	2.05297	-3.29393	0.00123531	0.0232158	-1.88784
CENPQ	-1.58235	4.9683	-4.65063	7.25947e-06	0.000885897	2.96992
C17orf58	-1.58178	2.55427	-6.32076	2.88035e-09	3.5306e-06	10.557
PAPLN	-1.58168	3.07065	-3.23854	0.00148245	0.0262168	-2.05661
QPCTL	-1.58125	6.55333	-3.88743	0.000152314	0.00620953	0.07154
RN7SL37P	-1.58122	1.02966	-3.08632	0.0024184	0.0363308	-2.50756
TBX20	-1.581	0.0624386	-2.98401	0.0033276	0.044303	-2.79992
TMPOP2	-1.58056	0.294182	-3.85343	0.000172873	0.00671333	-0.0479524
KCNG4	-1.57954	0.00838813	-3.13246	0.00208882	0.0330059	-2.37289
OLA1P1	-1.57928	1.84043	-3.08658	0.00241638	0.0363308	-2.5068
RN7SL382P	-1.57916	8.76702	-3.53594	0.000542376	0.0137609	-1.12179
AC115223.1	-1.57872	5.2915	-3.76933	0.000235642	0.00813378	-0.339834
MAGOHB	-1.57804	3.52126	-3.54324	0.000528733	0.0135333	-1.09798
RNY4P7	-1.57671	7.17401	-3.04409	0.00276157	0.0396597	-2.62929
TCEAL8	-1.57511	20.5543	-3.1145	0.00221182	0.0342125	-2.42551
AC006011.2	-1.57504	0.355418	-3.49507	0.000625125	0.0150114	-1.2544
KIRREL3	-1.57258	1.27753	-3.33337	0.00108341	0.0213047	-1.76618
GAPDHP73	-1.57229	0.384254	-2.99111	0.00325556	0.0436721	-2.77991
RPL39P3	-1.5721	71.07	-3.612	0.000415102	0.0115874	-0.871548
ARHGEF39	-1.57166	1.59565	-2.99713	0.00319563	0.0432029	-2.76293
COCH	-1.57107	3.93439	-3.80665	0.000205508	0.00743805	-0.210981
MIR606	-1.57088	6.05786	-3.16839	0.0018615	0.0305863	-2.26678
AC005099.1	-1.56995	3.02919	-3.4031	0.000856663	0.0183122	-1.54801
DNAL1	-1.56963	1.66633	-3.60408	0.000426911	0.0117917	-0.897825
PLPPR3	-1.56887	26.858	-5.29235	4.25986e-07	0.00011983	5.70153
MTND3P25	-1.56861	3.75375	-3.49994	0.000614675	0.0148575	-1.23867
CENPS	-1.56623	1.27964	-5.79343	3.9804e-08	2.4395e-05	7.99982
AC013436.1	-1.56605	0.115855	-3.43171	0.000777197	0.0173218	-1.4574
MTFR2	-1.56381	2.85503	-4.40745	1.99422e-05	0.00169929	2.00285
AC009220.1	-1.56351	1.50966	-3.18464	0.00176645	0.0295259	-2.21846
METAP2	-1.56135	23.3594	-3.95583	0.00011778	0.00523558	0.314523
ILF2P1	-1.56108	0.10686	-3.11799	0.00218737	0.0339883	-2.4153
MRPS15	-1.55896	11.9717	-4.11207	6.4693e-05	0.00360445	0.882278
RNY4P37	-1.55792	2.46499	-4.89974	2.48385e-06	0.000426813	4.0003
AC015910.1	-1.55791	1.41995	-3.17301	0.00183402	0.0302883	-2.25307
AL807757.2	-1.55689	3.36164	-3.85588	0.000171309	0.00666849	-0.0393817
AC025198.1	-1.55391	1.9119	-4.53986	1.15557e-05	0.00119766	2.52454
ZSCAN5DP	-1.55283	1.1034	-2.9229	0.00401127	0.0498552	-2.97039
FBXO5	-1.55273	4.3631	-5.23801	5.46501e-07	0.000146332	5.46067
RNF183	-1.54842	0.0945717	-3.84507	0.000178318	0.00683084	-0.0772033
AVEN	-1.54625	5.74306	-3.64823	0.000364924	0.0106221	-0.75078
ALMS1-IT1	-1.54594	1.37901	-3.40105	0.000862659	0.0183507	-1.5545
RPL30P14	-1.5457	0.748001	-3.07614	0.00249728	0.0369918	-2.53703
AC078889.1	-1.54521	0.948181	-2.95645	0.00362147	0.046898	-2.87719
AL161742.1	-1.54406	0.278175	-3.37218	0.000951105	0.0194897	-1.64525
SNRPGP2	-1.54278	2.04174	-3.61432	0.000411694	0.0115389	-0.863824
F2	-1.54062	0.446212	-5.13838	8.59316e-07	0.000201698	5.02347
HSPD1P3	-1.54004	0.0157125	-3.04434	0.00275944	0.0396535	-2.62858
AC121247.1	-1.53959	0.816219	-3.45697	0.000712814	0.0163064	-1.37684
RPL7AP26	-1.53619	0.630548	-3.13425	0.00207686	0.0329189	-2.3676
TMEM41A	-1.53605	3.10912	-3.68031	0.000325322	0.00997466	-0.642989
RACGAP1	-1.53586	11.1733	-3.99102	0.00010306	0.0048053	0.440855
RNASE3	-1.5351	91.062	-3.98155	0.00010684	0.00488655	0.406759
CKS2	-1.53363	38.4055	-3.40949	0.000838289	0.0180904	-1.52784
AC105429.2	-1.53265	0.376304	-3.39901	0.00086864	0.0184259	-1.56093
HSPE1	-1.53208	17.7273	-3.14679	0.00199522	0.0320764	-2.33068
AC090515.4	-1.5318	0.477749	-3.38349	0.000915483	0.0190196	-1.60977
SPEF1	-1.53014	0.103273	-3.21276	0.00161253	0.0277434	-2.13432
DEPDC1B	-1.5299	4.42057	-3.13228	0.00208997	0.0330059	-2.37339
KCTD1	-1.52986	0.940656	-2.93103	0.00391336	0.0492151	-2.94788
RPS29P5	-1.52938	5.00417	-3.17253	0.00183682	0.0303044	-2.25448
ATP5MD	-1.52841	31.3832	-3.12121	0.00216505	0.0337731	-2.40586
RN7SL246P	-1.52662	6.08212	-3.43816	0.000760266	0.0170747	-1.43689
AC104938.1	-1.52597	0.585027	-3.36352	0.000979247	0.0199094	-1.67234
RPL37AP1	-1.52465	5.38391	-3.20737	0.001641	0.0280669	-2.15048
RPSAP3	-1.52247	0.698507	-3.26931	0.00134002	0.0245971	-1.96318
RPL21P132	-1.52202	0.673593	-2.94937	0.00370069	0.0474713	-2.89693
SNORD11	-1.51965	14.4113	-3.74076	0.000261498	0.00864564	-0.437787
CDCA8	-1.5182	9.99169	-3.41721	0.000816579	0.0178101	-1.50342
EEF1E1	-1.51755	7.00951	-4.00064	9.93512e-05	0.00470396	0.475549
FTH1P3	-1.51713	5.48655	-4.63417	7.78243e-06	0.000931174	2.90323
PPIAP2	-1.51122	1.58045	-4.06746	7.68934e-05	0.00397504	0.718358
SUB1	-1.51072	19.7905	-5.63666	8.47188e-08	4.36729e-05	7.26626
MT1X	-1.50958	1.92271	-3.65951	0.000350505	0.010416	-0.712965
CDCA3	-1.50944	3.35513	-3.36133	0.000986456	0.0199994	-1.67915
LINC00511	-1.50888	0.0863633	-3.02879	0.00289656	0.040644	-2.67301
C10orf25	-1.5083	3.41096	-3.19728	0.00169565	0.028703	-2.18072
RN7SKP185	-1.50501	2.00875	-3.57542	0.000472314	0.0126754	-0.992443
AC100771.1	-1.50464	0.506925	-3.21153	0.001619	0.0278028	-2.13802
MAP6D1	-1.50448	2.67066	-5.09253	1.05635e-06	0.00023214	4.82424
RPL27AP	-1.50246	0.712726	-2.99248	0.00324181	0.0436028	-2.77604
AC099689.1	-1.50182	2.52998	-4.08658	7.14153e-05	0.00380331	0.788461
SASS6	-1.50072	5.01618	-3.52017	0.000572995	0.0142497	-1.1731
RCN2	-1.50045	5.45587	-3.6942	0.000309475	0.00972113	-0.596097
TRERF1	-1.49909	14.2061	-3.28503	0.00127225	0.0237359	-1.91513
GAPDHP58	-1.49894	0.313622	-3.1291	0.0021113	0.0332639	-2.38273
LPO	-1.49803	11.1877	-4.08438	7.20274e-05	0.00380916	0.780365
AC011458.1	-1.49737	1.39603	-3.50736	0.00059907	0.014586	-1.21466
AP000790.1	-1.49612	0.345581	-4.39735	2.07805e-05	0.0017473	1.96354
AC135279.1	-1.49595	5.66544	-3.3899	0.000895841	0.0188098	-1.5896
CHEK1	-1.49329	5.55134	-3.08156	0.00245499	0.0366557	-2.52135
PPIL3	-1.49141	10.3809	-3.15362	0.00195199	0.0316496	-2.31051
AC011406.1	-1.49005	1.07102	-3.63833	0.000378031	0.0109001	-0.783871
SAMD15	-1.48971	0.976145	-3.75791	0.000245671	0.0083288	-0.379056
AL161670.2	-1.48968	0.055578	-3.28487	0.00127293	0.0237359	-1.91563
GAPDHP2	-1.48965	2.16654	-3.64223	0.00037282	0.0107836	-0.770857
HPF1	-1.48784	8.44631	-4.21218	4.36927e-05	0.00285928	1.25524
AC015909.3	-1.48621	0.10775	3.21037	0.00162508	0.0278725	-2.14148
AL138921.2	-1.48599	3.83644	-2.98754	0.00329159	0.0439508	-2.78997
HMGB3P21	-1.4838	0.465465	-3.6777	0.000328387	0.010019	-0.651792
RRM2	-1.48371	14.9819	-3.38475	0.000911603	0.0189865	-1.60582
DBF4	-1.48362	4.91718	-5.29134	4.27972e-07	0.00011983	5.69703
MTA3	-1.48271	1.81911	-4.07458	7.48062e-05	0.00390742	0.744457
HNRNPA1P38	-1.48044	0.448717	-3.03682	0.00282498	0.040078	-2.65009
AL121906.2	-1.47963	0.556441	-4.41802	1.91001e-05	0.00166174	2.04406
AL355802.2	-1.47945	3.54929	-3.89028	0.000150702	0.00617205	0.0815861
GDI2P1	-1.47907	0.11878	-3.24164	0.00146749	0.0260517	-2.04724
AL136310.1	-1.47822	5.18752	-2.95758	0.00360888	0.0467831	-2.87401
CDC27	-1.47817	12.7437	-3.03997	0.0027973	0.0398904	-2.64107
GEMIN2	-1.47794	3.57373	-3.29851	0.00121672	0.0230075	-1.87379
COX7A2	-1.47619	22.293	-3.12488	0.0021399	0.0335282	-2.39512
RPL12P37	-1.47593	0.957345	-5.35214	3.23239e-07	0.00010366	5.96855
TRMT10C	-1.47418	11.211	-3.71824	0.000283753	0.00916365	-0.514573
AC010620.1	-1.47331	0.0564372	-3.00745	0.00309512	0.0423003	-2.7337
C1orf100	-1.47198	1.18075	-4.3153	2.89634e-05	0.00217261	1.64678
AC010969.2	-1.47089	1.56664	-4.459	1.61464e-05	0.00149936	2.20458
RAD51C	-1.47079	2.75235	-4.42799	1.83368e-05	0.00161716	2.08301
ABCB10	-1.46842	15.5797	-3.4516	0.000726077	0.0165358	-1.39402
AC073575.1	-1.46795	2.36673	-3.0253	0.00292823	0.0409114	-2.68297
SRPRB	-1.46728	8.64129	-5.04303	1.31834e-06	0.00027002	4.61053
MTCO1P29	-1.46528	0.727653	-2.99145	0.0032521	0.0436677	-2.77894
HORMAD2-AS1	-1.46503	0.952881	-3.20811	0.00163708	0.0280173	-2.14827
AC015853.2	-1.46407	1.21448	-3.281	0.00128931	0.0239774	-1.92747
TTC26	-1.46253	1.3808	-4.57065	1.01627e-05	0.00110641	2.64753
PPIAP15	-1.46117	0.13208	-3.76705	0.000237619	0.00815101	-0.347697
NT5DC2	-1.46098	9.13422	-3.23023	0.00152326	0.026665	-2.08171
GEN1	-1.46035	5.34496	-4.73116	5.15337e-06	0.000705346	3.29871
SMC2	-1.45862	12.5533	-3.48702	0.000642761	0.0152951	-1.28037
CALU	-1.45862	17.8496	-5.55054	1.27625e-07	5.81792e-05	6.86877
AL117209.1	-1.45809	1.12302	-3.12954	0.00210837	0.0332368	-2.38146
RNU1-67P	-1.45389	4.57357	-3.75624	0.000247178	0.008351	-0.384811
DUT	-1.45243	21.7292	-3.77915	0.000227335	0.0079264	-0.30605
AL136380.1	-1.44898	4.84485	-3.73007	0.00027185	0.00885705	-0.474293
AL122020.1	-1.44804	7.4872	-3.59802	0.000436156	0.011993	-0.917889
SNRPF	-1.44774	9.3872	-3.95181	0.000119585	0.00529814	0.300142
SLC3A1	-1.44719	0.590331	-4.99491	1.63295e-06	0.000314936	4.40423
AC007496.1	-1.44707	3.25179	-3.78257	0.000224501	0.00787496	-0.294239
YWHAZP2	-1.44693	0.77901	-3.06711	0.00256927	0.037651	-2.56311
AC092106.1	-1.44649	0.115791	-3.64935	0.00036347	0.0106103	-0.747036
AC008915.1	-1.44579	0.597123	-3.40986	0.000837238	0.0180819	-1.52667
ITGB1BP2	-1.44536	1.7882	-4.52974	1.20524e-05	0.00123287	2.48427
DNAJC25	-1.44441	3.77014	-4.58582	9.53717e-06	0.00105847	2.70838
WDR12	-1.44227	6.26279	-3.19067	0.00173233	0.0291231	-2.20046
PDIA3	-1.44057	71.1562	-6.16544	6.32501e-09	6.23002e-06	9.79003
ACAT1	-1.44055	9.19259	-3.05829	0.00264145	0.0383696	-2.58852
AC104763.1	-1.4397	8.42755	-3.84394	0.000179066	0.0068309	-0.0811514
SRSF10P1	-1.43929	0.949555	-3.6337	0.000384321	0.0110468	-0.799342
AC022154.1	-1.439	1.20331	-3.09642	0.00234238	0.0355619	-2.47823
TPRKB	-1.43883	9.30289	-4.01329	9.46693e-05	0.00454866	0.521261
AC093484.2	-1.43829	0.196012	3.59291	0.000444087	0.0121416	-0.934763
ARL6IP1	-1.43769	45.1718	-7.45568	6.88479e-12	3.1013e-08	16.4644
SNAPC1	-1.4374	3.48157	-4.78902	4.01914e-06	0.000599166	3.53748
PRC1	-1.43724	12.2503	-4.27814	3.36162e-05	0.00236811	1.50482
PIGU	-1.43688	12.6219	-4.18832	4.80058e-05	0.00301587	1.16571
IER3IP1	-1.43677	8.25491	-5.21449	6.08424e-07	0.00015973	5.35694
AP003086.2	-1.43638	4.10355	-4.54135	1.14845e-05	0.00119298	2.53047
TUBB6	-1.43627	14.3054	-3.30296	0.00119887	0.0227951	-1.86009
NCAPD2P1	-1.43593	0.0477147	-3.71448	0.000287633	0.00924029	-0.527339
LRRCC1	-1.43537	4.74682	-2.94417	0.00375984	0.0478578	-2.91139
TIPIN	-1.43484	4.33412	-3.82086	0.000195022	0.00717546	-0.161629
SNRPD1	-1.42913	9.20597	-4.92397	2.23335e-06	0.00040258	4.10263
RNU6-1297P	-1.42566	6.225	-3.62056	0.000402691	0.0113733	-0.843105
AC092431.2	-1.42564	4.83858	-4.31726	2.87362e-05	0.00215948	1.65429
AC008817.1	-1.42158	0.0295494	-3.09963	0.00231871	0.0353699	-2.46889
CU639417.4	-1.42138	0.00976824	-3.03299	0.00285895	0.0403317	-2.66104
NUDT7	-1.42134	2.84665	-3.40131	0.000861874	0.0183482	-1.55365
RPL9P3	-1.42066	1.84501	-3.44118	0.000752444	0.016962	-1.42725
TIMM23	-1.41979	29.7842	-5.51019	1.54428e-07	6.62083e-05	6.68396
DONSON	-1.41967	7.47768	-4.05639	8.02425e-05	0.00410383	0.677933
COQ7	-1.419	3.04033	-4.14943	5.59212e-05	0.00331317	1.02065
SEC61G	-1.41889	12.9916	-5.20536	6.34262e-07	0.000163053	5.31676
BCAS2	-1.41773	16.0256	-3.88146	0.000155751	0.00629382	0.0504738
SAMD11	-1.41732	1.75724	-3.14345	0.00201665	0.0322892	-2.34052
SNRPEP4	-1.41606	2.71143	-4.23826	3.94027e-05	0.00266677	1.35358
MIR1207	-1.41573	2.37956	-4.14515	5.68658e-05	0.00334313	1.00474
ARHGAP11A	-1.4155	8.98037	-4.02529	9.04218e-05	0.0044021	0.564744
AC010531.5	-1.41339	1.97541	-4.67682	6.49671e-06	0.00082107	3.07639
E2F8	-1.41226	5.22298	-4.07234	7.54564e-05	0.00392281	0.736249
AC090970.1	-1.41189	4.74374	-3.66425	0.000344616	0.0103308	-0.697065
WT1	-1.41075	4.06205	-3.11773	0.0021892	0.0340057	-2.41606
CAAP1	-1.41032	9.17169	-4.0775	7.39697e-05	0.00386739	0.755123
MRPL47	-1.4078	14.8242	-5.70814	6.01252e-08	3.29258e-05	7.59914
SPTY2D1OS	-1.40753	0.822226	-3.3307	0.0010931	0.021419	-1.77445
MAFG-DT	-1.40677	0.703013	-3.53653	0.000541267	0.0137566	-1.11988
POC1A	-1.40632	4.62993	-3.56147	0.000496029	0.0130226	-1.03828
POLE3	-1.40629	41.7383	-4.52716	1.21822e-05	0.00123534	2.47402
MNAT1	-1.40374	2.96283	-4.20878	4.42836e-05	0.00287106	1.24246
AL162231.2	-1.40355	0.918729	-3.70044	0.000302591	0.00960059	-0.574968
TLE1	-1.40323	3.17146	-3.69542	0.000308115	0.00970052	-0.591962
CBX1	-1.40277	11.5426	-4.29185	3.18211e-05	0.00229441	1.5571
OIP5	-1.40233	5.37488	-4.02881	8.92107e-05	0.00438493	0.57752
NDUFS4	-1.40154	18.9249	-3.80605	0.000205957	0.00744943	-0.213039
PGM3	-1.39915	3.24761	-3.83382	0.000185905	0.0070139	-0.116495
ERH	-1.3989	46.1243	-3.53158	0.000550679	0.0138888	-1.13599
PABPC1P2	-1.39881	0.323104	-2.95801	0.00360419	0.0467523	-2.87283
PRR11	-1.39716	12.2531	-4.02837	8.93626e-05	0.00438493	0.575908
RPS27AP9	-1.39607	0.610335	-3.57467	0.000473564	0.0126764	-0.994917
CEP78	-1.39369	3.11919	-3.42165	0.000804305	0.0176803	-1.48932
AC114482.1	-1.39204	0.268217	-4.42967	1.82111e-05	0.00161716	2.08959
TRGC2	-1.38915	17.9548	-3.84009	0.000181639	0.0068954	-0.0946059
BRIX1	-1.3881	5.97826	-5.18537	6.94605e-07	0.000173834	5.22896
AP002812.5	-1.38653	6.10343	-4.18788	4.80884e-05	0.00301587	1.16407
AC016712.1	-1.38616	2.15736	-3.18569	0.00176048	0.0294709	-2.21534
RPL21P10	-1.38614	3.39072	-4.10847	6.56047e-05	0.00362594	0.868994
VBP1	-1.38596	18.28	-4.82196	3.48558e-06	0.000541315	3.67438
TXNDC9	-1.38134	8.37401	-5.49168	1.68499e-07	6.9994e-05	6.59944
AC119396.2	-1.37942	29.0242	-3.24808	0.00143687	0.0256677	-2.02774
MTBP	-1.37931	2.02644	-2.99149	0.00325174	0.0436677	-2.77884
DHRS11	-1.37873	2.84854	-3.12375	0.00214766	0.0335684	-2.39845
MT-ND5	-1.37764	3461.29	-2.95739	0.00361106	0.0468004	-2.87456
NUCKS1	-1.37702	41.8388	-3.91965	0.000134997	0.00573235	0.18554
EIF4A1P5	-1.37595	0.406209	-4.09832	6.82399e-05	0.00371574	0.831617
INIP	-1.37579	8.15949	-3.52765	0.000558284	0.0140357	-1.14881
MRPL3	-1.37451	27.3606	-3.04017	0.0027956	0.0398765	-2.64051
CDK5R1	-1.37389	0.696576	-3.64185	0.000373324	0.0107926	-0.772123
FRG1	-1.37345	13.3042	-3.46251	0.000699375	0.0161005	-1.35909
AC026202.2	-1.37344	4.12882	-3.57636	0.000470755	0.0126542	-0.98935
OLA1	-1.37163	12.424	-4.15915	5.38342e-05	0.00324884	1.05679
DHFR	-1.37133	6.58045	-3.45973	0.000706104	0.0161994	-1.36802
HSD17B6	-1.37038	0.241249	-3.30128	0.0012056	0.0229072	-1.86528
CCT5P1	-1.36913	0.203627	-3.19058	0.00173285	0.0291231	-2.20074
AP000936.3	-1.36895	17.2453	-3.67345	0.000333432	0.0101109	-0.666104
AL024507.2	-1.36883	0.741318	-3.31801	0.00114038	0.0220864	-1.81372
AL121782.1	-1.36862	0.943613	-3.83004	0.000188525	0.00705006	-0.12969
MRPS10	-1.36827	16.3811	-4.10184	6.73144e-05	0.00368353	0.844576
RN7SL413P	-1.3666	4.49629	-3.18882	0.00174274	0.0292538	-2.20599
FDPSP7	-1.36389	0.237427	-2.93042	0.00392067	0.0492621	-2.94958
CANX	-1.36341	103.948	-5.47158	1.85195e-07	7.29654e-05	6.50789
AC025449.1	-1.36317	1.45595	-4.31508	2.89897e-05	0.00217261	1.64592
GAPDHP39	-1.36252	4.6185	-3.88964	0.000151065	0.0061723	0.079314
RPF2	-1.36223	6.63309	-4.14214	5.75396e-05	0.00337283	0.993548
AC130352.1	-1.35965	0.754987	-3.98322	0.000106164	0.00488022	0.412768
MYO1C	-1.35863	2.18287	-3.41364	0.000826542	0.0179493	-1.51471
UBE2N	-1.35787	14.0078	-4.43686	1.7683e-05	0.0015963	2.1177
PGM1	-1.35766	8.38294	-3.12351	0.00214931	0.0335751	-2.39915
AL359715.3	-1.35701	1.74183	-3.27831	0.00130081	0.02411	-1.93569
POLR3B	-1.35701	2.85398	-3.5563	0.000505101	0.0131917	-1.05523
GAPDHP68	-1.35679	0.32232	-2.99019	0.00326484	0.0437169	-2.78251
MMS22L	-1.35319	2.46554	-3.40556	0.000849552	0.0182407	-1.54026
TBCA	-1.35286	11.3357	-3.21229	0.00161501	0.0277688	-2.13574
AC063943.1	-1.35233	1.1259	-3.51447	0.000584463	0.0144114	-1.19161
POLR2K	-1.35171	15.8508	-3.01883	0.00298775	0.0413866	-2.70139
RNU6-302P	-1.34974	2.71715	-3.10092	0.00230922	0.0352642	-2.46513
RPL5P4	-1.34955	5.57566	-4.94118	2.07057e-06	0.000383256	4.1755
BRCA1	-1.34844	8.77204	-4.08724	7.12327e-05	0.00380208	0.79089
NDUFB6	-1.34796	11.2167	-3.50011	0.000614304	0.0148551	-1.23811
EIF4A1P7	-1.34693	0.300688	-3.9977	0.000100474	0.00473677	0.464914
RNA5SP312	-1.34531	0.352052	-3.85634	0.000171018	0.00666187	-0.0377782
AL136982.3	-1.34307	3.41113	-3.41534	0.000821772	0.0178809	-1.50932
AL121830.1	-1.34224	0.356189	-3.30975	0.00117213	0.0224725	-1.83918
AC106707.1	-1.34148	0.0879684	-3.02828	0.0029012	0.040678	-2.67448
TRBV8-2	-1.34051	1.41194	-3.74506	0.000257442	0.0085854	-0.423084
RNY4P25	-1.34027	11.7631	-3.46175	0.000701208	0.0161293	-1.36153
AC080075.1	-1.33869	0.437652	-2.9676	0.00349985	0.0458258	-2.84601
LIN9	-1.33803	2.77828	-2.99555	0.00321126	0.0433292	-2.76739
NOP58	-1.338	39.1536	-4.43364	1.7918e-05	0.00160604	2.10509
RIDA	-1.33759	4.23939	-3.34954	0.00102632	0.0206117	-1.71594
SMIM30	-1.33495	10.2491	-5.54414	1.31547e-07	5.94754e-05	6.83942
SLC35F2	-1.33492	5.50005	-3.79829	0.000211919	0.00759536	-0.239925
HNRNPU	-1.33488	78.3988	-3.9824	0.000106494	0.00488197	0.409831
C9orf131	-1.33411	0.711178	-3.20647	0.00164581	0.0281404	-2.15318
AUTS2	-1.33359	3.45469	-4.60474	8.8093e-06	0.000999959	2.78444
RNASEH2B	-1.33287	15.0905	-5.12877	8.97411e-07	0.000207114	4.9816
NFYB	-1.33083	6.55082	-3.79983	0.000210727	0.00756659	-0.23461
YIPF5	-1.33058	7.30719	-4.75964	4.56095e-06	0.00065515	3.41598
LSM3	-1.32714	8.10083	-4.22905	4.08696e-05	0.00272921	1.3188
AL391416.1	-1.32407	0.775996	-3.44099	0.000752938	0.0169654	-1.42787
MST1	-1.32319	2.59111	-3.55954	0.000499407	0.0130926	-1.04462
ARF4	-1.32311	38.1587	-5.552	1.26744e-07	5.81792e-05	6.87549
AC068389.3	-1.32307	3.60058	-4.02412	9.08287e-05	0.00441584	0.560491
AC234644.1	-1.32285	1.13752	-3.49294	0.000629739	0.0150869	-1.26127
SEC61B	-1.32214	28.6903	-3.89606	0.000147479	0.00609804	0.102003
GTF2H5	-1.32182	1.97712	-3.54859	0.000518931	0.0133756	-1.08049
AC138832.1	-1.32181	3.47107	-3.84527	0.000178189	0.00683084	-0.0765232
SPATA7	-1.31904	1.48804	-3.40424	0.00085335	0.0182867	-1.54441
SNORA71B	-1.31665	14.0031	-3.42282	0.000801122	0.0176263	-1.48563
AC022007.1	-1.31617	1.76247	-3.44027	0.000754782	0.0169931	-1.43014
RPL31P7	-1.31524	0.96042	-3.11289	0.00222315	0.0343012	-2.43021
SRP19	-1.31403	4.69241	-4.9796	1.74756e-06	0.000332392	4.33887
ANKRD42	-1.31366	2.47705	-3.48953	0.000637205	0.0152022	-1.27226
RPL12P44	-1.31354	1.88067	-3.66191	0.000347513	0.0103866	-0.704921
EME1	-1.31172	4.09136	-3.69781	0.000305478	0.00965121	-0.583888
AC099850.3	-1.31161	17.4478	-3.70414	0.000298583	0.00950349	-0.562444
PSMD10	-1.31074	10.8704	-3.57951	0.000465577	0.0125824	-0.979
SSX2IP	-1.30937	4.03948	-4.19086	4.75274e-05	0.0030015	1.17523
AP000240.1	-1.30929	9.81299	-3.03566	0.00283524	0.040158	-2.65341
PAK1IP1	-1.30922	9.62079	-4.15703	5.42822e-05	0.00325911	1.04891
LINC01090	-1.30757	0.0113532	-3.16088	0.00190705	0.0311216	-2.28906
ANLN	-1.30656	7.87596	-4.33849	2.63804e-05	0.00202662	1.73585
PINX1	-1.30626	0.989084	-3.28495	0.00127261	0.0237359	-1.91539
HAUS1	-1.30493	9.81329	-5.25395	5.08082e-07	0.000138056	5.53113
AC011511.3	-1.30441	0.351067	-3.17218	0.0018389	0.0303141	-2.25552
EIF4A1P9	-1.30405	0.200962	-2.94495	0.00375095	0.0477915	-2.90924
RNU6-387P	-1.30379	9.43447	-4.74647	4.82616e-06	0.000677811	3.3617
COX6C	-1.30353	16.0722	-3.75978	0.000244005	0.0082876	-0.372653
GAR1	-1.3032	9.8157	-3.15225	0.00196061	0.0317141	-2.31457
RAD51	-1.30319	5.51031	-4.47238	1.52815e-05	0.00144582	2.25721
RSRC2	-1.30268	17.8741	-4.76812	4.39765e-06	0.000636667	3.451
CEP76	-1.30202	2.05017	-4.50261	1.34882e-05	0.00133332	2.37658
UGP2	-1.30047	16.6994	-4.26211	3.58366e-05	0.00248606	1.4439
EIF3A	-1.29801	60.8364	-6.3331	2.70462e-09	3.4694e-06	10.6184
HMGN2P4	-1.29583	0.745548	-3.89265	0.000149373	0.00616533	0.0899501
ZWILCH	-1.29535	6.00649	-3.28779	0.0012607	0.0235486	-1.90669
NR2E3	-1.29431	0.242501	-4.7127	5.57641e-06	0.000742969	3.22297
PDIA6	-1.29279	30.6487	-5.52053	1.4708e-07	6.49024e-05	6.73121
FCF1P2	-1.29227	9.24529	-3.02535	0.00292775	0.0409114	-2.68282
KIF11	-1.29138	14.0998	-3.72496	0.000276929	0.00899065	-0.491692
EIF1P6	-1.28991	1.89037	-3.40998	0.000836885	0.0180814	-1.52628
EIF4A1P10	-1.28789	1.56325	-3.03877	0.00280783	0.039922	-2.64451
H2AFZ	-1.28575	65.2358	-4.04071	8.52286e-05	0.00427375	0.62079
GAPDHP72	-1.2852	1.36438	-3.22728	0.001538	0.0268465	-2.09061
KIF2C	-1.28446	8.65808	-3.53643	0.000541446	0.0137566	-1.12019
PIGX	-1.28373	5.34553	-5.20005	6.49766e-07	0.000165163	5.29342
GTSE1	-1.28237	4.79242	-3.32225	0.00112435	0.0218604	-1.80059
UPF3B	-1.28199	17.0825	-3.67118	0.000336162	0.0101607	-0.673756
EIF5B	-1.28151	26.8382	-5.33174	3.55233e-07	0.000108148	5.87722
CETN3	-1.2813	4.08288	-3.56975	0.000481819	0.012808	-1.01109
NDUFA5	-1.28079	3.61895	-4.33243	2.7033e-05	0.00205955	1.71255
KIF20B	-1.28055	7.37351	-2.96995	0.00347469	0.045664	-2.83943
AC034198.2	-1.2805	1.09666	-3.35128	0.00102032	0.0205292	-1.7105
USP31	-1.2791	1.86763	-3.8632	0.000166711	0.0065572	-0.0137108
YEATS4	-1.27603	13.1855	-3.97049	0.000111421	0.00503004	0.367025
TSSK1A	-1.27602	0.0553695	-3.1161	0.00220055	0.0340825	-2.42082
COX7A2L	-1.27582	11.9334	-5.36541	3.03964e-07	0.000100397	6.02805
AC010761.1	-1.27497	17.9434	-3.07449	0.00251029	0.0371369	-2.5418
USP1	-1.27327	17.6756	-4.08004	7.32451e-05	0.00384408	0.76446
IFT74	-1.27309	5.18928	-2.99943	0.00317293	0.0430665	-2.75641
CCDC59	-1.27234	7.30134	-4.84982	3.08849e-06	0.000497061	3.79069
AC104109.4	-1.27053	1.51635	-3.51886	0.000575613	0.0142955	-1.17736
CKS1B	-1.26911	6.22865	-2.96309	0.00354849	0.0462393	-2.85861
AP000436.1	-1.26907	0.614412	-3.2062	0.00164726	0.0281478	-2.154
SUV39H2	-1.26888	7.80532	-3.03093	0.00287733	0.0404462	-2.66691
FANCI	-1.26789	13.1031	-3.0444	0.00275889	0.0396535	-2.6284
SLC25A5	-1.26756	134.35	-2.99124	0.00325427	0.0436721	-2.77955
AL132777.1	-1.26435	0.845079	-3.43009	0.000781507	0.0173732	-1.46255
PIK3CB	-1.26326	15.5807	-4.16758	5.20827e-05	0.0031674	1.08822
NAA15	-1.26323	10.1396	-4.19865	4.60902e-05	0.00294246	1.20443
NCAPG2	-1.26319	8.681	-3.60787	0.000421224	0.011699	-0.885262
COX7B	-1.26318	17.1928	-2.94561	0.00374341	0.0477905	-2.9074
DNAJB11	-1.26121	11.5977	-5.41237	2.44314e-07	8.86586e-05	6.23954
RPP14	-1.25927	2.87383	-3.26999	0.00133701	0.0245582	-1.9611
RNU1-106P	-1.25924	7.6222	-5.39876	2.60321e-07	9.21126e-05	6.17809
P4HB	-1.25882	105.192	-5.12097	9.29503e-07	0.000210125	4.94769
AL592429.1	-1.25873	4.31102	-3.14446	0.00201016	0.0322041	-2.33756
PDE6A	-1.25854	0.200456	-3.42762	0.000788124	0.017436	-1.4704
AL035071.2	-1.25802	2.86713	-4.47255	1.52708e-05	0.00144582	2.25787
MPC1	-1.25533	17.2702	-4.14116	5.77597e-05	0.00338213	0.989922
RALGPS2	-1.25463	5.6921	-3.5724	0.000477359	0.0127447	-1.00239
RPL22P18	-1.25411	0.349146	-2.97891	0.0033803	0.0448314	-2.81427
PTGES3	-1.253	65.524	-4.99633	1.62271e-06	0.00031406	4.41029
AC127496.1	-1.24922	0.63963	-3.65975	0.000350211	0.010416	-0.712178
GMCL1	-1.24873	12.0697	-4.58307	9.64776e-06	0.00106432	2.69734
AC016747.3	-1.24762	6.73036	-3.35526	0.00100679	0.0203021	-1.69811
PDIA5	-1.24671	4.94575	-3.4175	0.000815754	0.0178101	-1.50248
GMPS	-1.24613	12.2606	-4.20137	4.55983e-05	0.0029212	1.21464
ATAD2	-1.24466	16.5359	-4.18265	4.90888e-05	0.00305395	1.1445
GAPDHP63	-1.24354	1.67733	-3.22407	0.00155419	0.0270348	-2.10029
RABL3	-1.24316	4.78008	-3.93282	0.00012847	0.00556933	0.232382
RANP8	-1.24202	1.01433	-3.01958	0.00298081	0.0413676	-2.69926
AL807752.5	-1.24024	1.48065	-3.78915	0.000219153	0.00776443	-0.271537
ATP5MC3	-1.23982	12.3812	-3.06192	0.00261152	0.0380377	-2.57807
AC004477.3	-1.23616	3.49521	-3.56069	0.000497394	0.013046	-1.04085
SEC24D	-1.23588	6.60801	-3.96173	0.000115179	0.0051568	0.335644
PRKRA	-1.23587	12.2184	-4.89521	2.53359e-06	0.000432664	3.98122
KCTD3	-1.23552	8.67616	-3.44199	0.00075037	0.016947	-1.42468
CCT2	-1.23492	38.4667	-3.52916	0.000555353	0.0139812	-1.14389
RPS15AP6	-1.23389	5.17115	-3.62149	0.000401364	0.0113514	-0.840013
ITGB1BP1	-1.23384	5.72691	-3.55098	0.000514605	0.0133076	-1.07266
AC005785.2	-1.23377	6.3716	-4.42834	1.83109e-05	0.00161716	2.08436
SND1-IT1	-1.23329	5.83024	-6.06193	1.06199e-08	9.15287e-06	9.28518
AC012640.4	-1.23124	0.209367	-4.63805	7.65599e-06	0.000926061	2.91893
KLHL20	-1.22828	7.66077	-3.26803	0.00134568	0.0246517	-1.96708
AC005183.1	-1.22756	3.03652	-3.46901	0.000683924	0.015864	-1.33827
HAVCR1	-1.22732	0.390184	3.52034	0.00057266	0.0142478	-1.17256
PCGF6	-1.22572	3.54233	-4.56096	1.05824e-05	0.00112686	2.60878
CPD	-1.2247	13.9416	-4.17332	5.09231e-05	0.0031175	1.10962
GAREM1	-1.22451	0.292985	-3.76718	0.000237503	0.00815101	-0.347236
HAUS6	-1.22427	7.42043	-4.29901	3.09215e-05	0.00225311	1.58443
IGBP1-AS2	-1.22113	1.55878	-3.51617	0.000581023	0.0143742	-1.1861
PGDP1	-1.2208	0.287985	-2.93241	0.00389696	0.0490535	-2.94405
USP48	-1.21961	18.864	-3.34287	0.00104952	0.0209066	-1.73669
STT3A	-1.21808	17.604	-4.10789	6.57516e-05	0.00363042	0.866872
SMIM20	-1.21741	6.59406	-3.76204	0.000242004	0.00823993	-0.364904
SPCS2	-1.21678	9.42343	-4.66742	6.76118e-06	0.000841851	3.03812
C6orf203	-1.21512	4.03764	-4.92538	2.21959e-06	0.000402505	4.10858
RPL7AP60	-1.21441	3.93567	-3.44913	0.000732234	0.0166348	-1.40189
FAAP24	-1.21271	1.8142	-3.8642	0.000166092	0.00654749	-0.0102003
AC005921.3	-1.21117	6.28706	-3.62503	0.000396342	0.0112653	-0.828213
HADHA	-1.20934	66.0979	-3.03977	0.00279913	0.0399062	-2.64167
UGDH	-1.20869	4.12656	-4.83705	3.26472e-06	0.000515985	3.73732
CHRM5	-1.20774	0.458712	-3.21618	0.00159466	0.027539	-2.12403
CCNI2	-1.20709	0.200093	-3.31068	0.00116852	0.0224111	-1.83633
JADE1	-1.20534	10.2755	-6.18585	5.70731e-09	5.8298e-06	9.89019
AC091057.1	-1.20475	4.98987	-3.61674	0.000408182	0.0114638	-0.855797
GFPT1	-1.20203	6.69728	-4.71455	5.5327e-06	0.000740724	3.23052
KIF9	-1.20185	2.56069	-3.66066	0.000349069	0.0104021	-0.709112
AC023906.5	-1.20155	4.04483	-3.0355	0.0028366	0.040158	-2.65385
MRC2	-1.2008	8.05824	-3.10422	0.00228522	0.0350141	-2.45553
UBE2V2	-1.20063	6.40279	-4.4072	1.9963e-05	0.00169929	2.00186
SNRPB2	-1.20029	17.8555	-4.3127	2.92683e-05	0.00218288	1.6368
AL138721.1	-1.19841	7.45262	-3.56747	0.000485702	0.0128492	-1.0186
GSG1	-1.19744	0.167629	-3.01681	0.00300656	0.0415844	-2.70713
LTV1	-1.197	16.2963	-5.44	2.14738e-07	8.10714e-05	6.3645
LDHAP5	-1.19572	0.355675	-3.74681	0.000255806	0.00855151	-0.417086
COPS3	-1.19527	25.5811	-3.38895	0.00089875	0.0188352	-1.59262
EIF3J	-1.19514	25.8232	-4.43189	1.80466e-05	0.00160813	2.09826
KIF24	-1.1941	3.25796	-3.15752	0.0019277	0.031375	-2.29898
TXN	-1.1938	69.6828	-2.93371	0.00388166	0.0489167	-2.94046
LSM12	-1.19348	4.00349	-5.5614	1.21219e-07	5.66638e-05	6.91871
IMPACT	-1.19283	7.09227	-3.57495	0.000473095	0.0126754	-0.99399
AC009220.2	-1.19246	0.403149	-4.44315	1.72328e-05	0.00157115	2.14234
ANKRD26	-1.18921	3.78201	-3.39804	0.000871493	0.0184391	-1.56398
NDUFC1	-1.18886	8.28593	-3.11192	0.00223	0.034378	-2.43304
AC005520.3	-1.18199	3.37993	-3.38493	0.000911023	0.0189865	-1.60523
RPL21P89	-1.18009	1.42897	-3.41146	0.000832692	0.0180261	-1.5216
EXOSC9	-1.17997	9.14599	-3.24762	0.00143904	0.0256945	-2.02913
IKBIP	-1.17871	6.51584	-4.85329	3.04223e-06	0.000497061	3.8052
RPL36AP15	-1.17593	8.43113	-3.29282	0.00123989	0.023278	-1.89126
ECT2L	-1.1759	0.936918	-2.97784	0.00339141	0.044914	-2.81727
DSN1	-1.1748	10.242	-3.25115	0.00142246	0.0254994	-2.01842
SEH1L	-1.17146	7.6596	-4.41564	1.92868e-05	0.00166654	2.03477
FOPNL	-1.17107	19.5724	-3.62838	0.000391663	0.0111995	-0.817082
DDN-AS1	-1.1706	0.977957	-3.60954	0.000418731	0.0116592	-0.879702
RAD1	-1.17052	4.15184	-3.38978	0.000896207	0.0188098	-1.58998
NUDT19	-1.17038	6.60112	-4.18155	4.93013e-05	0.00305652	1.14039
CPSF3	-1.16856	16.6079	-4.18216	4.91838e-05	0.0030551	1.14266
AC124016.2	-1.16765	2.03912	-3.32459	0.00111563	0.0217215	-1.79337
TOMM20	-1.16699	48.2011	-3.82071	0.00019513	0.00717546	-0.162153
PRIM2	-1.16516	4.49922	-5.26203	4.89621e-07	0.000133698	5.56691
MIR6745	-1.16504	0.130426	-3.19237	0.00172285	0.0289843	-2.1954
WDR76	-1.16416	7.22835	-3.37015	0.000957634	0.0195928	-1.6516
KDELR3	-1.16286	2.83311	-3.91864	0.000135511	0.00574972	0.181953
TYMS	-1.16139	34.3752	-3.70669	0.000295845	0.00944359	-0.553789
TMED2	-1.16088	39.7669	-6.70236	3.99439e-10	8.4741e-07	12.4866
NDUFB3	-1.16039	17.7803	-3.34531	0.00104095	0.0208111	-1.72908
CFAP36	-1.15882	7.11808	-3.30549	0.00118886	0.0226781	-1.85232
ARL13B	-1.15816	2.47969	-4.24026	3.90912e-05	0.00265546	1.36114
ARMCX3	-1.15763	10.0157	-3.02145	0.00296355	0.0412273	-2.69395
MED6	-1.15583	5.83859	-4.01065	9.56271e-05	0.0045827	0.511728
CCP110	-1.15516	6.84203	-3.9493	0.000120728	0.00532738	0.291146
ZSCAN5A	-1.15233	1.79198	-2.999	0.00317717	0.0430819	-2.75763
NPB	-1.15154	0.0532907	-3.6495	0.000363267	0.0106103	-0.746512
NUP37	-1.15089	5.61655	-3.053	0.0026856	0.0388703	-2.60372
ERGIC2	-1.14988	7.01722	-4.24296	3.86747e-05	0.00264326	1.37134
RPS27L	-1.14915	6.28396	-3.33164	0.00108969	0.0213748	-1.77155
RPA3	-1.14839	4.45403	-4.40498	2.01443e-05	0.00170944	1.99323
RWDD1	-1.14629	5.29081	-4.68871	6.17651e-06	0.000794677	3.12488
B4GALT2	-1.14595	4.47744	-3.95103	0.00011994	0.00530299	0.297341
CWC27	-1.14576	6.78299	-3.2346	0.00150169	0.0264047	-2.06853
LINC02551	-1.14543	0.202413	-2.9975	0.00319192	0.0431845	-2.76186
ALG6	-1.14455	5.41368	-3.23951	0.00147775	0.0261757	-2.05368
PARL	-1.14347	23.2213	-4.4828	1.46388e-05	0.00140673	2.29829
NME2P1	-1.14322	1.77096	-3.48386	0.000649799	0.0154028	-1.29053
RNU6-298P	-1.14208	4.24669	-3.18775	0.00174878	0.0293418	-2.20919
LSM5	-1.14186	5.43725	-5.94856	1.86296e-08	1.41678e-05	8.73809
SEC62	-1.14163	22.476	-4.95377	1.95879e-06	0.000366254	4.22895
COPS2	-1.14134	7.65091	-4.68504	6.27378e-06	0.000799205	3.10989
AL442663.2	-1.14089	5.30723	-4.09465	6.92185e-05	0.00374683	0.818106
ELF2	-1.1405	14.9779	-4.57883	9.8207e-06	0.00107583	2.68032
PPARG	-1.14048	1.70247	-3.86939	0.000162918	0.00646802	0.00800634
VDAC3	-1.14033	33.1887	-4.36601	2.36021e-05	0.00187319	1.84201
ANKHD1-EIF4EBP3	-1.14008	1.95282	-4.28938	3.2138e-05	0.0023082	1.54766
YTHDF2P1	-1.13846	0.632498	-3.60586	0.00042423	0.0117648	-0.891924
BZW1P1	-1.13821	0.190032	-3.55725	0.000503434	0.0131606	-1.05214
AC007228.1	-1.13768	0.644211	-3.64835	0.000364762	0.0106221	-0.750365
AC007229.1	-1.13545	1.37224	-3.86372	0.00016639	0.00655096	-0.0118895
AL353689.1	-1.13373	1.88602	-3.03926	0.00280352	0.039922	-2.64311
COA6	-1.13298	6.76807	-3.22997	0.00152455	0.0266706	-2.08249
SUMO2	-1.12907	31.9083	-3.49587	0.000623387	0.0149972	-1.2518
AL157938.2	-1.12865	1.62394	-3.03139	0.00287323	0.0404134	-2.6656
AC009090.2	-1.12722	0.439453	-3.17843	0.00180221	0.0299563	-2.23694
AC008871.1	-1.12689	0.323091	-3.3465	0.00103681	0.0207527	-1.72538
AL606490.2	-1.12643	0.0934225	-3.26825	0.0013447	0.024649	-1.96641
HMGN2P6	-1.12537	1.00736	-3.30017	0.00121003	0.0229597	-1.86868
AP000350.5	-1.12494	0.277702	-3.20088	0.00167595	0.0284874	-2.16994
ZCRB1	-1.12492	13.9501	-3.42895	0.000784535	0.0174071	-1.46615
MORF4L2P1	-1.12478	0.0209557	-3.36417	0.000977094	0.0198803	-1.67029
AL356320.1	-1.12431	9.98991	-4.23956	3.92007e-05	0.00265962	1.35848
RPL23AP73	-1.12409	0.0882274	-3.82823	0.000189786	0.00706949	-0.135975
IFT52	-1.12387	8.52877	-4.8231	3.46838e-06	0.00054043	3.67913
AL645465.1	-1.12367	0.281749	-3.38815	0.000901169	0.0188715	-1.59512
RNU6-135P	-1.12339	8.28337	-4.14647	5.65737e-05	0.00333749	1.00963
GON7	-1.12258	8.33163	-3.99593	0.000101151	0.00475245	0.458554
TMEM126A	-1.1215	15.0874	-5.3299	3.58276e-07	0.000108148	5.86897
AC093698.1	-1.12048	0.391672	-3.28348	0.00127879	0.02383	-1.91988
TMEM68	-1.12027	2.66564	-3.06611	0.00257741	0.0377002	-2.56601
AC134407.1	-1.11964	9.10551	-3.5128	0.000587865	0.0144621	-1.19703
EEF1A1P25	-1.11914	9.65588	-3.64439	0.000369957	0.0107246	-0.763626
RPL32P34	-1.11693	0.345896	-3.17313	0.00183331	0.0302856	-2.25271
RAD54L	-1.11567	7.53534	-3.23255	0.00151177	0.0265228	-2.07472
KBTBD11	-1.11543	10.0858	-4.91813	2.29141e-06	0.000406404	4.07793
ULBP1	-1.11491	0.0742475	-3.07962	0.00247007	0.0367936	-2.52697
EBNA1BP2	-1.11452	9.38814	-3.05727	0.00264987	0.0384541	-2.59144
TAF13	-1.113	7.58388	-3.5524	0.000512058	0.0132667	-1.06802
POMP	-1.11299	25.3544	-3.75109	0.000251854	0.00846559	-0.402442
RNU7-49P	-1.11277	3.80863	-3.23763	0.00148686	0.0262611	-2.05936
AC100832.2	-1.11189	0.0473274	-3.51845	0.000576443	0.0143032	-1.17871
NUDT15	-1.11179	7.17029	-3.95502	0.000118145	0.00524275	0.311602
MIA2	-1.11066	1.01671	-3.60904	0.000419479	0.0116672	-0.881374
PDCL3	-1.11005	7.81693	-4.05282	8.1354e-05	0.00415116	0.664892
AC009996.1	-1.10987	2.70605	-3.0497	0.00271354	0.0391725	-2.61321
SLC33A1	-1.1097	4.73959	-3.76364	0.000240594	0.00820714	-0.359407
LMAN1	-1.10955	19.5351	-4.68187	6.35884e-06	0.000806315	3.09697
B3GLCT	-1.10875	2.62494	-4.1459	5.67e-05	0.00334136	1.00751
CEP152	-1.10866	6.00448	-2.99094	0.00325728	0.0436721	-2.78039
ING2	-1.10856	8.24595	-4.81655	3.56815e-06	0.000551304	3.65187
IFT81	-1.10849	1.20643	-3.13701	0.00205867	0.0326962	-2.3595
RCN1	-1.10802	8.2809	-5.06646	1.18728e-06	0.000247372	4.71152
SDHAF3	-1.10751	4.62501	-5.13913	8.56426e-07	0.000201698	5.02673
CSE1L	-1.1074	28.9291	-2.98511	0.00331639	0.0442391	-2.79683
AC010422.2	-1.10727	1.19563	-3.53383	0.000546371	0.0138233	-1.12865
GTF3C6	-1.10682	25.9739	-3.40151	0.000861302	0.0183434	-1.55304
PTPN2P1	-1.1061	0.795766	-3.23036	0.00152261	0.026662	-2.08132
UTP11	-1.10528	8.43992	-4.90261	2.45279e-06	0.000425452	4.01241
AL358075.1	-1.10363	0.38509	-3.37215	0.000951183	0.0194897	-1.64532
RSL24D1	-1.10297	31.0599	-3.43866	0.000758949	0.0170521	-1.43527
AC093732.1	-1.10292	6.80927	-3.54825	0.000519538	0.013377	-1.08158
AC079238.1	-1.10238	0.0161952	-2.98862	0.00328064	0.0438471	-2.78693
NPM1	-1.10227	115.653	-3.10128	0.00230656	0.035243	-2.46407
NDUFAB1	-1.10213	14.4898	-4.30342	3.03792e-05	0.00222535	1.60129
COPS8	-1.10149	8.11566	-3.06684	0.00257149	0.0376736	-2.5639
RF00404	-1.09989	3.86945	-3.48317	0.000651364	0.0154134	-1.29277
PDHB	-1.09938	10.5041	-3.91667	0.000136513	0.00578336	0.174989
AC084083.1	-1.09831	3.37576	-3.48304	0.000651649	0.0154135	-1.29318
UQCRFS1	-1.09751	13.7213	-3.92525	0.000132183	0.00565198	0.205452
MKI67	-1.09468	20.5968	-2.97754	0.00339451	0.0449443	-2.8181
TOMM22	-1.09375	19.1518	-3.27798	0.00130224	0.0241203	-1.93671
PPA2	-1.09337	11.3058	-3.30235	0.00120132	0.0228338	-1.86198
SCARNA20	-1.09192	8.10274	-3.49576	0.000623635	0.0149972	-1.25218
TRGJP2	-1.09123	56.5194	-3.53773	0.000538992	0.0137259	-1.11594
AL138976.1	-1.09077	0.198851	-3.20133	0.00167349	0.0284623	-2.16858
ATP5PD	-1.09011	11.7373	-4.61099	8.581e-06	0.000984032	2.8096
RPS26P45	-1.08967	0.671613	-2.96694	0.00350688	0.0458923	-2.84784
DYNC1I2P1	-1.08918	0.52734	-3.27001	0.00133692	0.0245582	-1.96104
MASTL	-1.08896	7.24466	-3.23679	0.00149097	0.0262832	-2.06191
AC087276.3	-1.08885	1.69708	-3.19587	0.00170341	0.0287966	-2.18493
MIR199B	-1.08879	0.657606	-3.50818	0.000597362	0.0145723	-1.212
ZDHHC14	-1.08702	2.64592	-3.98265	0.000106393	0.00488197	0.410729
RSL24D1P8	-1.08488	1.3655	-3.09587	0.00234644	0.0355841	-2.47982
BORA	-1.08363	4.08014	-3.00006	0.00316677	0.0430131	-2.75463
USP14	-1.08231	15.6996	-4.12376	6.18152e-05	0.00350428	0.925478
COIL	-1.0821	7.25904	-3.47553	0.000668754	0.0156084	-1.31735
AC063976.2	-1.08143	0.0337651	-3.11712	0.00219344	0.0340333	-2.41784
ANKHD1	-1.0809	2.82077	-3.22341	0.00155754	0.0270843	-2.10228
COPS4	-1.07803	10.7621	-4.73556	5.05724e-06	0.000693912	3.31678
SPC24	-1.07658	4.75692	-3.15923	0.00191719	0.0312648	-2.29394
ANP32E	-1.07099	29.6996	-4.26777	3.5037e-05	0.00244944	1.46539
TM9SF1	-1.07004	1.72753	-3.9019	0.000144291	0.00600676	0.122639
INSR	-1.06949	10.68	-6.13161	7.49632e-09	7.0083e-06	9.62447
MRPL27	-1.06892	6.58953	-3.18642	0.00175632	0.029428	-2.21315
EIF4E	-1.06774	3.1092	-3.66178	0.000347674	0.0103866	-0.705356
AC023090.2	-1.06732	1.82061	-3.85112	0.000174363	0.00674452	-0.0560483
MATR3	-1.06687	2.31469	-3.20356	0.00166147	0.0283117	-2.16193
AC090617.8	-1.06615	4.59448	-3.43	0.000781747	0.0173732	-1.46284
TRA2B	-1.06557	34.7891	-3.38473	0.000911645	0.0189865	-1.60586
DARS2	-1.06526	11.2726	-3.41307	0.000828148	0.0179559	-1.51651
MIR1205	-1.06481	2.58227	-3.98046	0.000107282	0.00490073	0.402851
RPL13AP6	-1.06388	3.96033	-4.01628	9.35923e-05	0.00450696	0.532099
ERLIN1	-1.06373	32.6504	-4.23714	3.95786e-05	0.00266884	1.34935
ZCCHC10	-1.06119	7.1641	-3.58767	0.000452382	0.0123042	-0.952088
HADHB	-1.0609	30.9703	-3.52252	0.000568335	0.0141914	-1.16548
YBX3P1	-1.06079	0.465134	-2.93809	0.00383023	0.0484555	-2.92831
TRGJP1	-1.05895	33.7455	-3.20454	0.00165616	0.0282565	-2.15897
SPTSSA	-1.05864	11.7064	-3.93409	0.000127858	0.00555315	0.236896
SNORD13E	-1.05797	16.6923	-3.32101	0.00112903	0.0219205	-1.80445
LINC00552	-1.05741	0.0244385	-3.09856	0.00232655	0.0354113	-2.472
AC008982.2	-1.0574	14.5595	-3.08149	0.0024555	0.0366557	-2.52154
AC106864.1	-1.05716	2.56682	-3.56439	0.000490975	0.0129459	-1.0287
NUP54	-1.05517	12.7046	-4.57048	1.01697e-05	0.00110641	2.64687
AC004112.1	-1.05482	0.775185	-3.03332	0.00285596	0.0403226	-2.66008
AC008771.1	-1.05416	1.72373	-4.52628	1.2227e-05	0.00123627	2.47051
TMX4	-1.05403	19.6811	-3.15534	0.00194125	0.0315305	-2.30543
SDHD	-1.05402	20.5554	-3.56857	0.000483821	0.012818	-1.01497
C8orf59	-1.05241	8.49523	-3.32205	0.00112512	0.0218676	-1.80123
AC131159.2	-1.05197	0.690121	-3.5545	0.000508294	0.0132097	-1.06112
PCYOX1	-1.05151	5.99685	-3.6938	0.000309917	0.0097258	-0.597438
AC023632.6	-1.05035	1.32609	-3.02994	0.00288628	0.0405409	-2.66976
GOLT1B	-1.0498	10.3259	-4.28784	3.2336e-05	0.00231146	1.54181
RPS6P25	-1.04977	5.19992	-2.98968	0.00326992	0.0437462	-2.78394
AL136418.1	-1.04915	1.08535	-3.40679	0.000846009	0.0181811	-1.53637
AC098934.2	-1.04895	0.459997	-2.94037	0.00380365	0.0482311	-2.92196
ATP5MC1P4	-1.04699	0.334966	-3.88266	0.000155051	0.00627716	0.0547255
LINC00997	-1.0451	2.40689	-4.18083	4.94416e-05	0.00305734	1.13769
AXDND1	-1.044	0.0493635	-3.74325	0.000259141	0.00860045	-0.429269
AL133243.2	-1.04195	7.35538	-3.68669	0.000317958	0.00985342	-0.621492
MRPL48	-1.04154	4.9789	-3.65923	0.000350857	0.010416	-0.713906
ELF5	-1.04005	0.04291	-3.07657	0.00249393	0.0369692	-2.53579
RNY1P9	-1.0395	2.64611	-3.01546	0.00301917	0.0416649	-2.71097
XPOT	-1.03905	18.6157	-4.61215	8.53903e-06	0.00098126	2.8143
HYOU1	-1.03706	21.7052	-4.41876	1.90424e-05	0.00166174	2.04695
NUFIP1	-1.03639	2.67005	-3.45869	0.000708622	0.0162456	-1.37134
SELENOF	-1.03621	55.6311	-3.74553	0.000257	0.00857585	-0.421469
CCNF	-1.03581	4.6247	-3.3631	0.000980621	0.0199205	-1.67364
B3GALNT2	-1.03576	3.2117	-2.96043	0.00357755	0.0465341	-2.86606
VCPKMT	-1.03439	8.80448	-3.04439	0.00275893	0.0396535	-2.62841
CCSAP	-1.0343	7.97553	-2.94094	0.00379709	0.0481812	-2.92038
MEIOC	-1.03358	0.242528	-2.95387	0.00365009	0.0470629	-2.88437
CIT	-1.03317	4.18731	-3.37515	0.000941611	0.0193944	-1.63592
GNL2	-1.03232	11.1714	-4.10961	6.53142e-05	0.0036192	0.873206
CGAS	-1.03182	6.37496	-3.26668	0.00135165	0.0247329	-1.97118
ZNF444P1	-1.03147	0.319002	-3.12457	0.00214205	0.0335282	-2.39604
PABPC1P1	-1.03091	8.74349	-3.85938	0.000169095	0.00661498	-0.0271076
SEC63	-1.02966	13.8208	-4.46954	1.54613e-05	0.00145157	2.24602
ST13P3	-1.02965	0.145961	-2.99145	0.00325218	0.0436677	-2.77896
CDC42-IT1	-1.02945	8.97463	-3.49019	0.000635765	0.015181	-1.27015
MRPS35	-1.02804	17.2141	-4.37634	2.26334e-05	0.00182351	1.88201
HSD17B12	-1.02698	9.37775	-3.08623	0.00241908	0.0363308	-2.50782
THUMPD1	-1.02629	17.1444	-3.88653	0.000152831	0.00622572	0.0683402
ESD	-1.02592	23.9072	-3.89169	0.00014991	0.00617063	0.0865633
MRPL44	-1.02516	12.5735	-3.26447	0.00136153	0.0248514	-1.97792
NDC1	-1.02436	11.2447	-3.53433	0.000545418	0.013813	-1.12702
CDKN2AIPNL	-1.0239	7.54971	-3.22008	0.00157455	0.0273202	-2.11231
RBM26	-1.02363	23.9123	-3.29135	0.00124591	0.0233545	-1.89575
SPCS3	-1.023	31.6076	-3.96495	0.000113787	0.00511938	0.347152
ATP5MGL	-1.02134	0.835516	-3.42049	0.000807502	0.0177101	-1.49302
SLC26A2	-1.02025	5.81052	-4.28976	3.20883e-05	0.00230764	1.54913
FNDC3B	-1.01856	21.6507	-4.73676	5.03131e-06	0.000693806	3.32172
MAIP1	-1.01801	5.43167	-3.82295	0.000193521	0.00714485	-0.154346
CASKIN1	-1.01631	0.178439	-3.4029	0.000857247	0.0183122	-1.54865
METTL2A	-1.01563	3.39439	-3.99357	0.000102065	0.00478661	0.450034
GGT6	-1.0149	0.053292	-3.09818	0.00232936	0.0354405	-2.47311
AFG3L2	-1.01418	8.649	-3.48908	0.000638197	0.0152062	-1.27372
VDAC1	-1.01326	28.9087	-3.03742	0.00281966	0.0400283	-2.64837
RAN	-1.01277	41.0415	-3.4739	0.000672522	0.0156588	-1.32259
SMIM19	-1.01266	4.324	-3.77632	0.000229695	0.00797737	-0.315771
ESF1	-1.01191	10.0171	-3.89137	0.000150088	0.00617063	0.0854442
SRSF3	-1.01024	41.0021	-5.08455	1.09486e-06	0.00023776	4.78969
AL021707.7	-1.00966	3.22283	-3.89625	0.000147377	0.00609804	0.102654
HMBOX1-IT1	-1.00954	1.51544	-3.33123	0.00109118	0.0213888	-1.77281
AL954705.1	-1.00934	3.75213	-4.54164	1.14703e-05	0.00119298	2.53165
SNORA2B	-1.0081	9.61174	-5.24338	5.3326e-07	0.000143483	5.48437
LYRM4	-1.00753	2.53549	-3.45238	0.000724139	0.0164985	-1.39153
ARMC1	-1.00542	12.7056	-3.06667	0.00257287	0.0376754	-2.56439
SMC6	-1.0048	6.797	-3.59685	0.000437953	0.0120244	-0.921738
GALNT1	-1.00376	24.3888	-3.62501	0.00039637	0.0112653	-0.828279
AP005482.3	-1.00367	1.50314	-3.54244	0.00053021	0.0135586	-1.10059
SSR1	-1.0021	23.0577	-4.8376	3.25687e-06	0.000515985	3.73963
MRPL51	-1.00102	18.2255	-4.37496	2.27612e-05	0.00183016	1.87663
PRKCQ-AS1	1.00021	5.6439	3.96271	0.000114753	0.00514609	0.339149
TRAV22	1.0011	0.754241	3.33173	0.00108936	0.0213748	-1.77127
AC009950.1	1.00289	2.71562	4.47134	1.53469e-05	0.0014476	2.25312
CDC42P3	1.00351	0.384318	3.1196	0.00217624	0.0338973	-2.4106
RN7SL589P	1.00524	1.07897	-3.33811	0.00106638	0.021099	-1.75148
BORCS8	1.00951	6.22105	3.21038	0.00162503	0.0278725	-2.14145
TRAF3IP3	1.00995	15.4084	6.77301	2.7531e-10	6.32743e-07	12.8506
WDR6	1.0106	40.744	2.96025	0.0035796	0.0465385	-2.86658
AC010247.1	1.01292	1.46061	3.59289	0.000444127	0.0121416	-0.934846
CCDC22	1.01612	10.9525	3.83063	0.00018811	0.00704408	-0.127611
MGRN1	1.01624	18.3712	4.68556	6.26007e-06	0.000799205	3.11199
VAV1	1.01682	27.1152	5.35444	3.19815e-07	0.000103162	5.97885
RC3H2	1.01825	11.9273	3.1312	0.00209721	0.0330988	-2.37658
TBC1D17	1.01839	10.0472	3.20167	0.00167165	0.0284412	-2.16756
DENND1C	1.0194	17.7169	3.98202	0.000106651	0.00488197	0.408432
FAM234A	1.02464	9.15221	3.01038	0.00306717	0.0420319	-2.7254
TRAF1	1.02613	3.83353	3.70036	0.000302678	0.00960059	-0.57524
SMPD2	1.02965	6.05085	4.34335	2.58682e-05	0.00199561	1.75455
ZFYVE19	1.02966	6.16382	4.7796	4.18569e-06	0.000617323	3.49846
AC009113.1	1.03041	1.8372	2.97982	0.00337079	0.0447376	-2.8117
RECQL5	1.03133	5.60176	3.68525	0.0003196	0.00988552	-0.626329
TBC1D10A	1.03331	2.34602	4.20347	4.52224e-05	0.00291064	1.22251
VAT1	1.03536	46.9124	-3.5934	0.000443328	0.0121405	-0.93316
CLASRP	1.03549	18.9379	3.04297	0.00277128	0.0397454	-2.63251
BTG1P1	1.03573	1.29371	3.61872	0.000405331	0.0114128	-0.849229
GSTK1	1.03585	40.7191	3.62604	0.000394924	0.0112519	-0.824852
TRIM8	1.04091	29.8899	3.31219	0.00116268	0.0223379	-1.83168
AC020931.1	1.04181	1.16971	4.48669	1.44056e-05	0.00138915	2.31365
MAP3K14-AS1	1.04504	1.68992	4.7605	4.5441e-06	0.000654434	3.41953
AL158210.1	1.04514	1.94778	3.60888	0.000419719	0.0116672	-0.881908
AP002986.1	1.04576	0.2467	3.09471	0.00235506	0.0356386	-2.48318
SZT2	1.04728	11.4099	3.44963	0.000731001	0.0166205	-1.40032
AC002350.1	1.05039	2.20502	4.42886	1.82716e-05	0.00161716	2.08642
SIN3B	1.0507	9.5123	4.02843	8.93407e-05	0.00438493	0.57614
CABIN1	1.05126	22.1517	3.97495	0.000109553	0.00497764	0.383024
ITGAL	1.05402	51.599	4.18137	4.93374e-05	0.00305652	1.1397
ZFAND3	1.05422	16.8577	4.40958	1.97701e-05	0.00169069	2.01113
LPXN	1.05589	25.7224	3.69314	0.000310657	0.00973249	-0.599679
DOCK2	1.05711	31.1556	3.54365	0.000527971	0.0135279	-1.09663
HPS1	1.05745	23.4837	4.77556	4.25914e-06	0.000623536	3.48175
CCDC130	1.06026	12.7607	4.01858	9.27718e-05	0.00448484	0.540439
SEC24B-AS1	1.06199	0.92239	3.0386	0.00280935	0.0399245	-2.64501
PACSIN2	1.06334	20.4178	3.70843	0.000293995	0.00940084	-0.547894
PHRF1	1.06367	14.4445	3.5515	0.000513667	0.0132958	-1.07095
TAPBP	1.06512	67.1849	4.00325	9.83692e-05	0.00467351	0.484955
AL512343.2	1.06622	2.08757	3.10538	0.00227679	0.0349529	-2.45213
TRAPPC10	1.06918	8.30508	3.8909	0.000150353	0.00617063	0.0837756
PTPRVP	1.06956	0.706409	4.54625	1.1252e-05	0.00117547	2.55004
PRR12	1.07165	13.2935	3.97581	0.000109193	0.00496947	0.386139
DHX58	1.07401	5.13814	5.01134	1.51809e-06	0.000297994	4.47452
EXOC3	1.07786	11.2527	4.01118	9.54364e-05	0.00457956	0.513618
RPS6KB2	1.07853	8.57867	3.1227	0.00215485	0.0336426	-2.40152
AC133552.2	1.08304	1.19494	3.66734	0.000340822	0.0102514	-0.686676
AL117344.1	1.0862	0.76453	3.02533	0.00292798	0.0409114	-2.68289
PHF21A	1.08627	13.3162	3.67503	0.000331556	0.0100818	-0.660809
CYB5R3	1.08842	22.592	3.22597	0.00154462	0.0269278	-2.09458
C11orf68	1.08848	17.7583	3.11645	0.0021981	0.0340825	-2.41979
GBAP1	1.08859	4.06064	3.83139	0.000187582	0.00703865	-0.124962
MIGA2	1.08943	7.82943	2.97228	0.00344988	0.0454554	-2.83288
REL	1.08994	9.36704	3.14843	0.00198475	0.031992	-2.32584
LEMD2	1.09004	7.86612	3.64778	0.000365508	0.0106279	-0.75228
SDR39U1	1.09063	4.18717	3.87586	0.000159038	0.00637449	0.0307569
MVD	1.09094	3.71475	2.97611	0.00340954	0.0450766	-2.82214
BANP	1.09357	2.79112	5.06624	1.18845e-06	0.000247372	4.71057
PISD	1.09525	16.4992	6.32183	2.8647e-09	3.5306e-06	10.5623
C21orf62-AS1	1.09602	1.01152	3.97376	0.000110046	0.00498768	0.378782
AL031846.2	1.09829	1.00281	3.29292	0.00123946	0.023278	-1.89095
NUMA1	1.10112	20.8906	3.56423	0.000491263	0.0129459	-1.02925
AC027601.1	1.10224	2.07959	4.26617	3.52617e-05	0.00245891	1.4593
P2RX1	1.1028	53.0465	3.30048	0.00120879	0.0229521	-1.86773
MTMR14	1.10472	13.9751	3.30627	0.00118578	0.0226633	-1.84991
ADAR	1.10642	56.986	4.81171	3.64374e-06	0.000559847	3.63172
NDOR1	1.10672	17.2983	3.08332	0.00244136	0.0365486	-2.51624
RNA5SP494	1.10801	5.15588	2.97453	0.00342607	0.0452534	-2.82656
WDTC1	1.10859	24.5714	3.55574	0.000506095	0.0132052	-1.05707
VAC14	1.11071	9.63423	3.3287	0.00110043	0.0215166	-1.78064
CCDC200	1.11347	14.1084	2.9604	0.00357786	0.0465341	-2.86613
VMAC	1.11408	7.63523	4.09252	6.97908e-05	0.00375937	0.810292
ABCD1	1.11547	8.37522	3.17179	0.00184121	0.0303344	-2.25668
ZNF385A	1.11557	21.534	3.01581	0.00301591	0.0416615	-2.70998
TAOK2	1.116	8.92163	3.82872	0.000189441	0.00706949	-0.134261
REPS2	1.11621	1.72337	3.17924	0.00179752	0.0299271	-2.23454
SEC14L1	1.11705	7.49828	3.96717	0.000112832	0.00508474	0.355121
LINC01089	1.11785	6.57764	4.38202	2.21176e-05	0.00180738	1.90401
AC093726.2	1.11805	2.34834	2.97014	0.00347258	0.045664	-2.83887
RGS19	1.12034	37.79	3.03591	0.00283299	0.040158	-2.65269
UCP2	1.12069	83.4579	3.53721	0.000539976	0.0137336	-1.11765
ST20-AS1	1.12131	1.07321	4.0428	8.45472e-05	0.00424731	0.628398
SUSD6	1.12215	17.0338	5.37628	2.89008e-07	9.82895e-05	6.07689
[truncated: 1,100 more rows]
[truncated: 3 more columns]

## Sheet: Table S3
Additional file 1: Table S3. The co-expression gene associated with ARHGAP9 expression
Query	Statistic	P-value	FDR (BH)	Event_SD	Event_TD
EIF3A	-0.673687	1.05612e-23	1.46604e-20	169	169
TMEM87A	-0.617391	3.90299e-19	1.72388e-16	169	169
PRRC1	-0.614007	6.87237e-19	2.89276e-16	169	169
NANOS1	-0.603102	4.06525e-18	1.46304e-15	169	169
LMAN1	-0.598206	8.83438e-18	2.86146e-15	169	169
SEC31A	-0.597577	9.75212e-18	3.10693e-15	169	169
PDPN	-0.592581	2.12087e-17	6.44014e-15	169	27
MORF4L2	-0.587425	4.66221e-17	1.37281e-14	169	169
EPT1	-0.582556	9.68693e-17	2.57885e-14	169	169
XPOT	-0.580481	1.31795e-16	3.32637e-14	169	169
CANX	-0.578218	1.8392e-16	4.46787e-14	169	169
BMS1P5	-0.577768	1.96481e-16	4.71409e-14	169	169
PRPS2	-0.577494	2.0452e-16	4.84713e-14	169	169
LARP1B	-0.575844	2.6022e-16	6.02038e-14	169	169
SLC26A2	-0.569007	6.95941e-16	1.4701e-13	169	169
RAD17	-0.568777	7.19002e-16	1.4865e-13	169	169
RASL12	-0.566888	9.39565e-16	1.88242e-13	169	53
UGP2	-0.564203	1.37036e-15	2.63679e-13	169	169
PHF17	-0.562477	1.74359e-15	3.2898e-13	169	169
C5orf33	-0.558808	2.89567e-15	5.25929e-13	169	169
STRN3	-0.556481	3.9823e-15	7.03563e-13	169	169
RCN2	-0.550346	9.1144e-15	1.51393e-12	169	169
H2AFV	-0.546388	1.54111e-14	2.43496e-12	169	169
USP14	-0.544791	1.90123e-14	2.90933e-12	169	169
RIOK2	-0.543729	2.18485e-14	3.26618e-12	169	169
SCFD1	-0.541311	2.99309e-14	4.34087e-12	169	169
BRIX1	-0.540553	3.30179e-14	4.71816e-12	169	169
GFPT1	-0.539848	3.61623e-14	5.05596e-12	169	169
OGDHL	-0.539213	3.92503e-14	5.40986e-12	169	109
CHAT	-0.538981	4.04405e-14	5.49595e-12	169	15
UTP15	-0.535537	6.28211e-14	8.13804e-12	169	169
SMC5	-0.535486	6.32316e-14	8.13804e-12	169	169
EIF3J	-0.535182	6.57209e-14	8.34785e-12	169	169
ITGB6	-0.533552	8.08023e-14	9.87617e-12	169	84
SYNCRIP	-0.533047	8.61205e-14	1.04604e-11	169	169
GALNT1	-0.529846	1.2869e-13	1.46255e-11	169	169
TAF9	-0.529716	1.30806e-13	1.47795e-11	169	169
MIB1	-0.52901	1.42824e-13	1.5952e-11	169	169
BZW1	-0.528454	1.53068e-13	1.69018e-11	169	169
COL2A1	-0.527481	1.72691e-13	1.88544e-11	169	131
RCN1	-0.527025	1.82716e-13	1.98374e-11	169	169
USO1	-0.525323	2.25403e-13	2.39371e-11	169	169
MTFR1	-0.523712	2.74655e-13	2.85435e-11	169	169
PRKRA	-0.522769	3.08201e-13	3.169e-11	169	169
LARS	-0.522259	3.27948e-13	3.33683e-11	169	169
C19orf2	-0.521241	3.71176e-13	3.73753e-11	169	169
SLC30A5	-0.51916	4.77369e-13	4.68545e-11	169	169
SSTR2	-0.518987	4.87429e-13	4.76015e-11	169	166
CALU	-0.518439	5.20674e-13	5.05939e-11	169	169
NUP54	-0.518311	5.28721e-13	5.11203e-11	169	169
GJC1	-0.518014	5.47939e-13	5.21993e-11	169	160
SPTY2D1	-0.517911	5.54767e-13	5.25919e-11	169	169
GMCL1	-0.517624	5.74186e-13	5.41686e-11	169	169
GFRA3	-0.517082	6.12733e-13	5.72493e-11	169	96
UBE2Q2	-0.515381	7.50713e-13	6.82893e-11	169	169
G3BP1	-0.515255	7.62081e-13	6.8885e-11	169	169
LOC642826	-0.513876	8.97656e-13	8.07641e-11	169	169
C18orf19	-0.511199	1.23093e-12	1.08736e-10	169	169
SEC63	-0.509729	1.46231e-12	1.26868e-10	169	169
SIX3	-0.509658	1.47446e-12	1.27354e-10	169	71
METTL2A	-0.50956	1.49142e-12	1.28249e-10	169	169
THUMPD1	-0.50791	1.80757e-12	1.50766e-10	169	169
DNAL1	-0.507816	1.82752e-12	1.51778e-10	169	169
DBF4	-0.506514	2.12513e-12	1.73528e-10	169	169
TASP1	-0.505127	2.49419e-12	2.01967e-10	169	169
ELL3	-0.503829	2.89541e-12	2.31561e-10	169	169
FAM133B	-0.503244	3.09575e-12	2.46569e-10	169	169
ASNSD1	-0.502792	3.26032e-12	2.58616e-10	169	169
SEH1L	-0.502671	3.30567e-12	2.61148e-10	169	169
TSN	-0.502408	3.40628e-12	2.67636e-10	169	169
FST	-0.502178	3.49701e-12	2.72935e-10	169	99
MKRN2	-0.501481	3.78565e-12	2.93109e-10	169	169
CEP76	-0.500645	4.16316e-12	3.1979e-10	169	169
TMED2	-0.496841	6.39405e-12	4.63664e-10	169	169
HNRNPA3	-0.49649	6.64995e-12	4.75854e-10	169	169
PUM2	-0.496477	6.66009e-12	4.75854e-10	169	169
RABL3	-0.496303	6.7905e-12	4.83394e-10	169	169
PIK3CB	-0.495243	7.64439e-12	5.35276e-10	169	169
C12orf11	-0.494978	7.87363e-12	5.46486e-10	169	169
HRASLS5	-0.494484	8.31875e-12	5.73286e-10	169	145
YTHDF2	-0.494301	8.48931e-12	5.82973e-10	169	169
EDN3	-0.494134	8.64839e-12	5.91806e-10	169	53
PSMC6	-0.493991	8.78702e-12	5.99182e-10	169	169
GLMN	-0.493873	8.9029e-12	6.04961e-10	169	169
KIAA1586	-0.492121	1.08086e-11	7.19364e-10	169	169
ZMYM4	-0.491557	1.15019e-11	7.5772e-10	169	169
PHAX	-0.491227	1.19278e-11	7.75266e-10	169	169
PLAA	-0.490861	1.24183e-11	8.04459e-10	169	169
MTHFD2	-0.489642	1.41959e-11	9.13518e-10	169	169
SERBP1	-0.489032	1.51751e-11	9.63766e-10	169	169
EXTL2	-0.488515	1.60562e-11	1.01311e-09	169	169
ARFGEF1	-0.487616	1.77089e-11	1.10661e-09	169	169
LTV1	-0.487575	1.7788e-11	1.10799e-09	169	169
HNRNPA3P1	-0.487446	1.80382e-11	1.11641e-09	169	169
THAP9	-0.487384	1.8161e-11	1.12045e-09	169	169
DNAJC21	-0.487167	1.85941e-11	1.13993e-09	169	169
ARSK	-0.486766	1.94213e-11	1.18318e-09	169	169
SRPRB	-0.486523	1.99407e-11	1.21102e-09	169	169
MATR3	-0.485686	2.18305e-11	1.29742e-09	169	169
RINT1	-0.484217	2.55787e-11	1.49278e-09	169	169
VKORC1L1	-0.483874	2.65402e-11	1.54426e-09	169	169
TARS	-0.483442	2.78016e-11	1.60325e-09	169	169
OSTC	-0.483268	2.83242e-11	1.62856e-09	169	169
MAGT1	-0.481815	3.3092e-11	1.8915e-09	169	169
UBA6	-0.481462	3.43629e-11	1.95838e-09	169	169
KPNA3	-0.480946	3.63038e-11	2.05481e-09	169	169
CSPP1	-0.480928	3.63721e-11	2.05481e-09	169	169
ARMC1	-0.48071	3.72259e-11	2.08486e-09	169	169
FYTTD1	-0.480162	3.94614e-11	2.20371e-09	169	169
PCYOX1	-0.480132	3.95858e-11	2.20433e-09	169	169
SLC25A46	-0.478885	4.51758e-11	2.48008e-09	169	169
KIAA0895	-0.478752	4.58185e-11	2.50123e-09	169	169
LOXL4	-0.478677	4.61821e-11	2.51401e-09	169	169
MNS1	-0.478102	4.9076e-11	2.64929e-09	169	169
TOPORS	-0.47792	5.00271e-11	2.68571e-09	169	169
SSR1	-0.476892	5.57387e-11	2.96774e-09	169	169
RMND1	-0.476647	5.71934e-11	3.0286e-09	169	169
ZNF473	-0.476579	5.76015e-11	3.04193e-09	169	169
PTPRG	-0.47651	5.80229e-11	3.05587e-09	169	155
NKX3-2	-0.476437	5.84666e-11	3.07092e-09	169	34
CNOT10	-0.476019	6.10909e-11	3.20011e-09	169	169
AZGP1	-0.475792	6.2557e-11	3.25062e-09	169	44
CNIH	-0.475368	6.53934e-11	3.38895e-09	169	169
NCBP2	-0.47511	6.71814e-11	3.45398e-09	169	169
TEX15	-0.474522	7.14393e-11	3.65356e-09	169	84
MRPS22	-0.47441	7.22759e-11	3.68664e-09	169	169
SFRS12	-0.474379	7.25131e-11	3.68906e-09	169	169
CCT2	-0.474325	7.2922e-11	3.70017e-09	169	169
TTC26	-0.473881	7.63716e-11	3.84509e-09	169	168
CCNC	-0.473651	7.82181e-11	3.92788e-09	169	169
PDIA3P	-0.472971	8.3948e-11	4.16185e-09	169	169
CCT4	-0.472881	8.47312e-11	4.18999e-09	169	169
LARP1	-0.472172	9.11883e-11	4.48646e-09	169	169
PGBD5	-0.471819	9.45762e-11	4.61807e-09	169	131
UBE2V2	-0.471173	1.01108e-10	4.87577e-09	169	169
EXOC5	-0.471007	1.0285e-10	4.93528e-09	169	169
ASPG	-0.470983	1.03112e-10	4.93564e-09	169	37
USP46	-0.470673	1.06455e-10	5.08315e-09	169	169
RG9MTD1	-0.47051	1.08257e-10	5.15655e-09	169	169
IGDCC4	-0.470193	1.11847e-10	5.3145e-09	169	156
ALG5	-0.46953	1.19727e-10	5.64749e-09	169	169
DIXDC1	-0.469485	1.20279e-10	5.65981e-09	169	169
MPHOSPH10	-0.469396	1.21381e-10	5.68496e-09	169	169
FAM98A	-0.469237	1.23373e-10	5.76354e-09	169	169
ZNF138	-0.468321	1.3551e-10	6.30026e-09	169	169
RPL23AP53	-0.467981	1.40292e-10	6.48912e-09	169	169
NDUFA5	-0.466301	1.66465e-10	7.62989e-09	169	169
ZHX1	-0.466273	1.66941e-10	7.6337e-09	169	169
AVEN	-0.465726	1.76466e-10	8.05033e-09	169	169
LNX1	-0.465502	1.80518e-10	8.21587e-09	169	169
UAP1	-0.464794	1.93923e-10	8.76443e-09	169	169
ARL1	-0.464759	1.94613e-10	8.77521e-09	169	169
PIGN	-0.464722	1.95351e-10	8.78807e-09	169	169
TM9SF3	-0.464645	1.96866e-10	8.83578e-09	169	169
NUCB2	-0.464053	2.08988e-10	9.294e-09	169	169
C12orf29	-0.46383	2.13732e-10	9.48328e-09	169	169
C9orf82	-0.463799	2.14416e-10	9.49194e-09	169	169
SNRPD1	-0.463753	2.15398e-10	9.51375e-09	169	169
ZC3H15	-0.463713	2.1628e-10	9.53105e-09	169	169
DIMT1L	-0.463455	2.21957e-10	9.73531e-09	169	169
ZNF22	-0.463354	2.24226e-10	9.77041e-09	169	169
CCDC43	-0.4628	2.37069e-10	1.03069e-08	169	169
CCDC138	-0.461618	2.66865e-10	1.1474e-08	169	169
CDC23	-0.46148	2.70586e-10	1.1606e-08	169	169
YTHDF3	-0.46146	2.71129e-10	1.1606e-08	169	169
C14orf135	-0.461285	2.75907e-10	1.17587e-08	169	169
BCKDHB	-0.461256	2.76699e-10	1.17667e-08	169	169
ASTN1	-0.461077	2.81706e-10	1.19534e-08	169	42
GPR153	-0.460875	2.87438e-10	1.21445e-08	169	168
SFRS13A	-0.460795	2.89742e-10	1.21934e-08	169	169
SCAMP1	-0.460791	2.89871e-10	1.21934e-08	169	169
RABL5	-0.460496	2.98501e-10	1.25272e-08	169	169
CSNK1G1	-0.460455	2.9974e-10	1.25272e-08	169	169
PEX3	-0.460283	3.04929e-10	1.27167e-08	169	169
TOMM20	-0.460115	3.10053e-10	1.29027e-08	169	169
FAM198A	-0.460062	3.1169e-10	1.29431e-08	169	153
C3orf33	-0.459632	3.2531e-10	1.34625e-08	169	169
HAUS6	-0.459602	3.26276e-10	1.34625e-08	169	169
ARL6IP1	-0.459428	3.31993e-10	1.36117e-08	169	169
LYRM7	-0.459236	3.38355e-10	1.38434e-08	169	169
CP110	-0.459212	3.39163e-10	1.38472e-08	169	169
C14orf174	-0.459134	3.41817e-10	1.38972e-08	169	169
AKAP9	-0.459047	3.44768e-10	1.39298e-08	169	169
NEK5	-0.458916	3.49271e-10	1.40243e-08	169	157
MAPK6	-0.458793	3.53549e-10	1.41668e-08	169	169
DKFZp686O24166	-0.458397	3.67726e-10	1.46143e-08	169	169
ZC3H14	-0.458144	3.77044e-10	1.49236e-08	169	169
RPAP2	-0.458107	3.78403e-10	1.49344e-08	169	169
PCM1	-0.458095	3.78855e-10	1.49344e-08	169	169
POLR3G	-0.457994	3.82667e-10	1.50541e-08	169	169
VBP1	-0.457357	4.07524e-10	1.59996e-08	169	169
SNAPC1	-0.457294	4.10053e-10	1.60665e-08	169	169
DYNC2LI1	-0.457148	4.15983e-10	1.62008e-08	169	169
ANKRD26	-0.456656	4.36676e-10	1.69051e-08	169	169
SRP72	-0.456599	4.39133e-10	1.69664e-08	169	169
METTL8	-0.456559	4.40826e-10	1.6998e-08	169	169
C3orf23	-0.456436	4.46204e-10	1.71713e-08	169	169
SPIN4	-0.456173	4.57879e-10	1.75858e-08	169	169
RPGRIP1L	-0.456141	4.59339e-10	1.76071e-08	169	169
MTPAP	-0.455243	5.01645e-10	1.893e-08	169	169
RWDD4A	-0.454461	5.41565e-10	2.03181e-08	169	169
SUB1	-0.454022	5.6528e-10	2.10453e-08	169	169
L2HGDH	-0.453577	5.90341e-10	2.18761e-08	169	169
ALG6	-0.453445	5.97986e-10	2.20836e-08	169	169
IFT74	-0.453411	5.99987e-10	2.20836e-08	169	169
WRN	-0.453171	6.14176e-10	2.25631e-08	169	169
KCNJ11	-0.453125	6.16904e-10	2.25643e-08	169	157
FXR1	-0.452943	6.27909e-10	2.28945e-08	169	169
E2F6	-0.45284	6.34268e-10	2.30399e-08	169	169
MEG8	-0.452636	6.4699e-10	2.34582e-08	169	22
TNFAIP8L3	-0.452297	6.68636e-10	2.41529e-08	169	117
NDFIP2	-0.452255	6.7133e-10	2.42052e-08	169	168
FAM45A	-0.451953	6.91272e-10	2.47863e-08	169	169
STAU2	-0.451318	7.35173e-10	2.6137e-08	169	169
COPS2	-0.451311	7.35665e-10	2.6137e-08	169	169
COIL	-0.451151	7.4715e-10	2.64966e-08	169	169
TXNDC9	-0.451103	7.50616e-10	2.6571e-08	169	169
C14orf126	-0.451071	7.52933e-10	2.66045e-08	169	169
LZTFL1	-0.450562	7.90885e-10	2.78443e-08	169	169
TMEM68	-0.450441	8.00161e-10	2.81199e-08	169	169
GEN1	-0.450109	8.26169e-10	2.88773e-08	169	169
DDX20	-0.44982	8.49513e-10	2.96399e-08	169	169
PRAMEF20	-0.448843	9.33178e-10	3.22694e-08	169	10
FGF13	-0.448468	9.67322e-10	3.33314e-08	169	101
BMS1	-0.448305	9.82517e-10	3.37951e-08	169	169
PIGK	-0.448261	9.86721e-10	3.382e-08	169	169
LOC401397	-0.448208	9.91775e-10	3.39334e-08	169	169
NUP133	-0.447994	1.01225e-09	3.45731e-08	169	169
THOC1	-0.447916	1.01989e-09	3.4773e-08	169	169
TIPRL	-0.447869	1.02445e-09	3.48673e-08	169	169
RPF2	-0.447811	1.03018e-09	3.50008e-08	169	169
ESD	-0.447721	1.03906e-09	3.52408e-08	169	169
WDR31	-0.447088	1.10382e-09	3.71322e-08	169	169
C5orf24	-0.447078	1.10482e-09	3.71322e-08	169	169
NOP58	-0.447065	1.10628e-09	3.71322e-08	169	169
BLID	-0.44656	1.16077e-09	3.88938e-08	169	44
FBXO4	-0.446134	1.20887e-09	4.03663e-08	169	169
MRPL32	-0.446023	1.22164e-09	4.06551e-08	169	169
EIF2A	-0.445748	1.25401e-09	4.14257e-08	169	169
LOC285548	-0.445742	1.25475e-09	4.14257e-08	169	59
SSX2IP	-0.445738	1.25524e-09	4.14257e-08	169	169
B3GALTL	-0.44564	1.26696e-09	4.16617e-08	169	169
CLINT1	-0.445469	1.28775e-09	4.2274e-08	169	169
WDR36	-0.444658	1.39065e-09	4.54981e-08	169	169
TMEM41A	-0.444359	1.43056e-09	4.6507e-08	169	169
HSPA13	-0.444357	1.43079e-09	4.6507e-08	169	169
COPB1	-0.444355	1.43106e-09	4.6507e-08	169	169
ZDHHC9	-0.444324	1.43525e-09	4.65653e-08	169	169
MYB	-0.444229	1.44832e-09	4.68329e-08	169	169
FAM35B2	-0.44371	1.52104e-09	4.88593e-08	169	169
TFF2	-0.443676	1.52591e-09	4.89349e-08	169	11
IRX5	-0.443187	1.59792e-09	5.09974e-08	169	134
NAA15	-0.443164	1.60144e-09	5.10202e-08	169	169
BTF3L4	-0.443079	1.61437e-09	5.13481e-08	169	169
FAIM	-0.443044	1.61963e-09	5.14311e-08	169	169
UGDH	-0.442798	1.65757e-09	5.22943e-08	169	169
ABL2	-0.442517	1.70205e-09	5.33509e-08	169	169
TCERG1	-0.4419	1.80348e-09	5.60781e-08	169	169
UTP11L	-0.441665	1.84378e-09	5.70575e-08	169	169
CPSF3	-0.441643	1.84762e-09	5.70854e-08	169	169
NRXN3	-0.441569	1.8604e-09	5.7298e-08	169	140
PDIA3	-0.440849	1.99015e-09	6.11005e-08	169	169
LOC399959	-0.440818	1.99604e-09	6.11846e-08	169	126
CCDC47	-0.440529	2.05051e-09	6.26566e-08	169	169
PHF16	-0.440414	2.07266e-09	6.32341e-08	169	169
SALL3	-0.439893	2.17606e-09	6.59743e-08	169	17
USP48	-0.439652	2.22544e-09	6.72616e-08	169	169
MRPL30	-0.439573	2.24194e-09	6.76552e-08	169	169
HSPA4L	-0.43949	2.25925e-09	6.79665e-08	169	162
PURG	-0.439094	2.34414e-09	7.04113e-08	169	87
PAK1IP1	-0.43836	2.50944e-09	7.50285e-08	169	169
IFT52	-0.437995	2.59592e-09	7.74949e-08	169	169
EIF5B	-0.437561	2.7023e-09	8.04235e-08	169	169
SUV39H2	-0.437466	2.72609e-09	8.10075e-08	169	169
COCH	-0.43696	2.85674e-09	8.47601e-08	169	169
FAM35B	-0.436804	2.89818e-09	8.57279e-08	169	169
TCP1	-0.4364	3.00825e-09	8.87138e-08	169	169
CCDC55	-0.43626	3.04735e-09	8.9613e-08	169	169
MYO9A	-0.436257	3.04797e-09	8.9613e-08	169	169
PRPH	-0.436181	3.06937e-09	9.01059e-08	169	64
FNDC3B	-0.436113	3.08866e-09	9.05354e-08	169	169
CCT6A	-0.435875	3.15715e-09	9.22023e-08	169	169
TCF12	-0.435868	3.15911e-09	9.22023e-08	169	169
VMA21	-0.435263	3.33989e-09	9.68769e-08	169	169
MRPS10	-0.435163	3.37068e-09	9.76242e-08	169	169
FAM19A5	-0.435094	3.39209e-09	9.8098e-08	169	109
CEP290	-0.434859	3.46626e-09	9.97976e-08	169	169
FAM5B	-0.434668	3.52724e-09	1.01253e-07	169	48
ARMCX3	-0.434358	3.6289e-09	1.03712e-07	169	169
DARS	-0.434036	3.73744e-09	1.06345e-07	169	169
SLC35A3	-0.433811	3.81527e-09	1.084e-07	169	169
LACE1	-0.433655	3.87013e-09	1.09799e-07	169	169
KRR1	-0.433248	4.01667e-09	1.12803e-07	169	169
OTUD6B	-0.432848	4.16583e-09	1.16698e-07	169	169
PTGES3	-0.432844	4.16737e-09	1.16698e-07	169	169
LEO1	-0.432647	4.24294e-09	1.18644e-07	169	169
SNX4	-0.432387	4.34452e-09	1.21309e-07	169	169
ZNF440	-0.432358	4.35603e-09	1.21456e-07	169	169
SFRS3	-0.431931	4.52823e-09	1.25896e-07	169	169
ASS1	-0.43171	4.61994e-09	1.2808e-07	169	132
ESF1	-0.431339	4.77835e-09	1.32283e-07	169	169
PDCD4	-0.431163	4.85511e-09	1.34026e-07	169	169
HSPA9	-0.430743	5.04333e-09	1.38827e-07	169	169
SGOL2	-0.430204	5.29546e-09	1.45151e-07	169	169
MLF1IP	-0.430082	5.35401e-09	1.46138e-07	169	169
RNASEH2B	-0.429875	5.45502e-09	1.48509e-07	169	169
CEBPZ	-0.429614	5.58505e-09	1.51804e-07	169	169
NPM1	-0.429581	5.60147e-09	1.51861e-07	169	169
FAM45B	-0.429579	5.60278e-09	1.51861e-07	169	169
CKAP2	-0.429562	5.61103e-09	1.51873e-07	169	169
ACER2	-0.429335	5.72722e-09	1.54802e-07	169	169
LYSMD3	-0.429308	5.7411e-09	1.54962e-07	169	169
CEP63	-0.428993	5.90631e-09	1.5876e-07	169	169
MAP6D1	-0.428624	6.10549e-09	1.63693e-07	169	169
VDAC3	-0.428508	6.16979e-09	1.64929e-07	169	169
GLRX3	-0.428472	6.18978e-09	1.65237e-07	169	169
MNAT1	-0.428343	6.26154e-09	1.66923e-07	169	169
SPCS2	-0.428287	6.29338e-09	1.67313e-07	169	169
UNCX	-0.428233	6.32418e-09	1.67902e-07	169	46
CDKN2AIP	-0.428077	6.41296e-09	1.70027e-07	169	169
GTPBP10	-0.428017	6.44759e-09	1.70712e-07	169	169
ELF2	-0.427956	6.48325e-09	1.71422e-07	169	169
PRIM2	-0.427919	6.50492e-09	1.71529e-07	169	169
UGGT1	-0.427418	6.80333e-09	1.78429e-07	169	169
C9orf5	-0.427245	6.90948e-09	1.80969e-07	169	169
MAK16	-0.427181	6.94895e-09	1.81758e-07	169	169
DDX52	-0.426761	7.21494e-09	1.88208e-07	169	169
TOMM70A	-0.426658	7.28203e-09	1.89197e-07	169	169
RAD1	-0.426343	7.48939e-09	1.94324e-07	169	169
NUCKS1	-0.425816	7.84976e-09	2.02862e-07	169	169
HAUS1	-0.425795	7.8647e-09	2.02978e-07	169	169
LOC647979	-0.42567	7.95236e-09	2.04968e-07	169	169
IER3IP1	-0.425648	7.96823e-09	2.05105e-07	169	169
GSG1L	-0.425271	8.2395e-09	2.11498e-07	169	125
GOLM1	-0.425247	8.25767e-09	2.11498e-07	169	169
RANBP9	-0.425098	8.36746e-09	2.13351e-07	169	169
METTL10	-0.425079	8.38143e-09	2.13351e-07	169	169
C6orf35	-0.425071	8.38739e-09	2.13351e-07	169	169
SPATA7	-0.424909	8.50949e-09	2.15724e-07	169	169
GDI2	-0.424903	8.51397e-09	2.15724e-07	169	169
MRPL1	-0.424843	8.55911e-09	2.16586e-07	169	169
UBA5	-0.424617	8.73252e-09	2.204e-07	169	169
ZDHHC14	-0.424361	8.93279e-09	2.25162e-07	169	169
CCBL2	-0.42411	9.13391e-09	2.29636e-07	169	169
PDIA6	-0.423918	9.29052e-09	2.33271e-07	169	169
OLA1	-0.423741	9.43774e-09	2.36662e-07	169	169
YIPF5	-0.423575	9.57668e-09	2.39837e-07	169	169
ACSM1	-0.423201	9.89877e-09	2.47266e-07	169	160
CNOT7	-0.422773	1.02801e-08	2.55681e-07	169	169
DDX18	-0.422764	1.02883e-08	2.55681e-07	169	169
TP53BP2	-0.422727	1.03213e-08	2.56173e-07	169	169
GMPS	-0.422604	1.04342e-08	2.58244e-07	169	169
RBM27	-0.422593	1.04446e-08	2.58244e-07	169	169
ALG9	-0.422557	1.04772e-08	2.58722e-07	169	169
COPS8	-0.422463	1.05647e-08	2.60221e-07	169	169
DHX15	-0.422391	1.06318e-08	2.61543e-07	169	169
MOSPD1	-0.422298	1.07194e-08	2.63365e-07	169	169
PPP4R2	-0.422251	1.07635e-08	2.64114e-07	169	169
MTIF2	-0.42189	1.1111e-08	2.71953e-07	169	169
RBMX	-0.421449	1.15508e-08	2.82362e-07	169	169
PIGW	-0.421255	1.17487e-08	2.86839e-07	169	169
RPS6KB1	-0.421072	1.19391e-08	2.9003e-07	169	169
CPA3	-0.42102	1.19933e-08	2.9062e-07	169	168
IFT81	-0.420894	1.21267e-08	2.93123e-07	169	169
UGT3A2	-0.420697	1.23378e-08	2.97484e-07	169	151
PNCK	-0.420672	1.23645e-08	2.97759e-07	169	59
EPDR1	-0.420528	1.25213e-08	3.0079e-07	169	169
LOC158696	-0.420467	1.25891e-08	3.02046e-07	169	51
NARG2	-0.420371	1.26947e-08	3.04203e-07	169	169
ZNF498	-0.420035	1.30733e-08	3.12889e-07	169	169
MESDC2	-0.41978	1.33676e-08	3.19148e-07	169	169
TYW3	-0.41956	1.3627e-08	3.24942e-07	169	169
ZBTB7C	-0.419524	1.36709e-08	3.25588e-07	169	145
NKIRAS1	-0.419441	1.37692e-08	3.27529e-07	169	169
ACTR6	-0.419283	1.39605e-08	3.31672e-07	169	169
UTP14C	-0.419195	1.40679e-08	3.33816e-07	169	169
CKAP5	-0.419174	1.40935e-08	3.34016e-07	169	169
ZNF131	-0.419124	1.41559e-08	3.35086e-07	169	169
LOC387646	-0.419105	1.41791e-08	3.35141e-07	169	169
HMGB3	-0.418569	1.4857e-08	3.49112e-07	169	169
ANAPC7	-0.418548	1.48834e-08	3.49112e-07	169	169
NFYB	-0.418541	1.48922e-08	3.49112e-07	169	169
FBXO22	-0.418441	1.50222e-08	3.5171e-07	169	169
PRPF40A	-0.41813	1.54348e-08	3.59663e-07	169	169
PTPLAD1	-0.418053	1.55386e-08	3.6165e-07	169	169
ZNF107	-0.417862	1.57971e-08	3.66633e-07	169	169
ZNF429	-0.417755	1.59453e-08	3.69346e-07	169	169
TAF9B	-0.417735	1.59735e-08	3.69559e-07	169	169
FAM20B	-0.417347	1.65187e-08	3.80813e-07	169	169
GTF2H2C	-0.417246	1.66638e-08	3.83249e-07	169	169
RBM25	-0.416997	1.70278e-08	3.91155e-07	169	169
MORF4L1	-0.416965	1.70744e-08	3.91763e-07	169	169
DCUN1D4	-0.416906	1.71619e-08	3.93307e-07	169	169
TOP2B	-0.416853	1.72418e-08	3.94672e-07	169	169
TYW1	-0.416831	1.72748e-08	3.94963e-07	169	169
IRX3	-0.416725	1.74335e-08	3.9719e-07	169	147
ACTL6A	-0.4166	1.76225e-08	3.99621e-07	169	169
WDR60	-0.416238	1.81816e-08	4.09909e-07	169	169
NGLY1	-0.416094	1.84091e-08	4.14192e-07	169	169
TRNT1	-0.416069	1.84493e-08	4.14192e-07	169	169
C4orf43	-0.41593	1.86713e-08	4.18138e-07	169	169
LRRC40	-0.415928	1.86757e-08	4.18138e-07	169	169
MSH6	-0.415764	1.89406e-08	4.23581e-07	169	169
OSBP	-0.415676	1.90851e-08	4.26321e-07	169	169
KIAA1797	-0.415507	1.93656e-08	4.32091e-07	169	169
HSPD1	-0.415292	1.97275e-08	4.38153e-07	169	169
DDX1	-0.414369	2.13549e-08	4.7214e-07	169	169
PIBF1	-0.414176	2.17119e-08	4.79489e-07	169	169
PJA2	-0.414108	2.18385e-08	4.81191e-07	169	169
EIF2S1	-0.413881	2.22691e-08	4.89567e-07	169	169
CCDC99	-0.413786	2.24499e-08	4.91872e-07	169	169
GLT8D1	-0.413605	2.28004e-08	4.97868e-07	169	169
RTL1	-0.413586	2.28382e-08	4.98134e-07	169	70
GNPNAT1	-0.413526	2.29565e-08	5.00153e-07	169	169
MMP2	-0.413347	2.33097e-08	5.06712e-07	169	168
VPS37A	-0.413288	2.34273e-08	5.08701e-07	169	169
ITPR2	-0.413193	2.36183e-08	5.12274e-07	169	169
GSPT1	-0.412992	2.4028e-08	5.19421e-07	169	169
ZBTB11	-0.412953	2.41082e-08	5.20577e-07	169	169
BDP1	-0.412844	2.43339e-08	5.24284e-07	169	169
IBTK	-0.412499	2.50602e-08	5.38096e-07	169	169
ZBTB10	-0.412487	2.50857e-08	5.38096e-07	169	169
TTC19	-0.412173	2.57667e-08	5.5088e-07	169	169
UBR1	-0.411973	2.62103e-08	5.58836e-07	169	169
HSP90B1	-0.41126	2.78479e-08	5.89539e-07	169	169
SPHAR	-0.411129	2.816e-08	5.95497e-07	169	169
EFNB3	-0.410799	2.89582e-08	6.10384e-07	169	121
FAM18B2	-0.410575	2.95138e-08	6.21421e-07	169	169
EIF4E	-0.410363	3.00501e-08	6.31345e-07	169	169
PDE3B	-0.41023	3.03902e-08	6.37393e-07	169	169
C11orf57	-0.410217	3.04229e-08	6.37393e-07	169	169
ZNF562	-0.410075	3.07904e-08	6.42729e-07	169	169
MKI67IP	-0.409985	3.10263e-08	6.46959e-07	169	169
NOL10	-0.409889	3.12804e-08	6.51557e-07	169	169
HSP90AA1	-0.409838	3.14154e-08	6.5367e-07	169	169
C20orf11	-0.409777	3.15771e-08	6.55629e-07	169	169
MRPL3	-0.409726	3.17128e-08	6.57745e-07	169	169
HBS1L	-0.409707	3.17645e-08	6.58114e-07	169	169
METTL2B	-0.409512	3.22921e-08	6.67622e-07	169	169
NRAS	-0.409368	3.26864e-08	6.74339e-07	169	169
ACCN2	-0.409162	3.32599e-08	6.84717e-07	169	165
CETN2	-0.409045	3.35898e-08	6.90777e-07	169	169
COPS4	-0.408786	3.43323e-08	7.02706e-07	169	169
SFRS12IP1	-0.408779	3.43507e-08	7.02706e-07	169	169
SMC6	-0.408655	3.47131e-08	7.09374e-07	169	169
GRSF1	-0.408584	3.49215e-08	7.12882e-07	169	169
TCTN1	-0.408373	3.55467e-08	7.24124e-07	169	169
ERGIC2	-0.408106	3.63537e-08	7.39014e-07	169	169
CTH	-0.407758	3.74336e-08	7.60172e-07	169	164
EHBP1	-0.407724	3.75378e-08	7.61493e-07	169	169
PRKCI	-0.407664	3.77275e-08	7.64543e-07	169	169
CDON	-0.407476	3.83276e-08	7.75086e-07	169	168
MTMR2	-0.407438	3.84496e-08	7.76747e-07	169	169
IRX1	-0.407215	3.91757e-08	7.90592e-07	169	79
CBX3	-0.406959	4.00258e-08	8.06074e-07	169	169
CCDC34	-0.406917	4.01667e-08	8.07239e-07	169	169
MTDH	-0.406875	4.03078e-08	8.09238e-07	169	169
YME1L1	-0.406543	4.14431e-08	8.30197e-07	169	169
N4BP2L1	-0.406511	4.15549e-08	8.30841e-07	169	169
ZNF639	-0.405958	4.3519e-08	8.67434e-07	169	169
CAND1	-0.405896	4.37465e-08	8.71076e-07	169	169
SKIV2L2	-0.405869	4.38451e-08	8.72145e-07	169	169
NUDCD2	-0.405771	4.42062e-08	8.78428e-07	169	169
SEPHS1	-0.405641	4.4689e-08	8.87116e-07	169	169
SLC24A1	-0.405594	4.48631e-08	8.89663e-07	169	169
TRIM24	-0.405441	4.54395e-08	8.98344e-07	169	169
SLC10A7	-0.4054	4.55934e-08	9.0047e-07	169	169
IFT88	-0.405006	4.71143e-08	9.29564e-07	169	169
MRPL47	-0.404906	4.75101e-08	9.36421e-07	169	169
C5orf42	-0.404673	4.8438e-08	9.50398e-07	169	169
ANKRD46	-0.404471	4.9257e-08	9.6207e-07	169	169
YWHAQ	-0.404422	4.94581e-08	9.6503e-07	169	169
USP16	-0.40428	5.00455e-08	9.75511e-07	169	169
PCGF6	-0.404226	5.02703e-08	9.78514e-07	169	169
CCNG1	-0.404207	5.03506e-08	9.78514e-07	169	169
ACOT13	-0.404019	5.11409e-08	9.9288e-07	169	169
TCEAL8	-0.404001	5.12178e-08	9.9338e-07	169	169
NAA30	-0.403926	5.15355e-08	9.98544e-07	169	169
TWIST1	-0.403665	5.26647e-08	1.01738e-06	169	107
ATPBD4	-0.403581	5.30316e-08	1.02299e-06	169	169
CEP57	-0.403575	5.30604e-08	1.02299e-06	169	169
CALR	-0.403472	5.35143e-08	1.03072e-06	169	169
DLG1	-0.402871	5.62388e-08	1.07785e-06	169	169
PAICS	-0.40284	5.63827e-08	1.07849e-06	169	169
MED4	-0.402744	5.68345e-08	1.08606e-06	169	169
GPN1	-0.402552	5.77422e-08	1.10016e-06	169	169
DCAF13	-0.40248	5.8087e-08	1.10564e-06	169	169
TAF1B	-0.402113	5.9871e-08	1.13515e-06	169	169
COPG2	-0.40208	6.00324e-08	1.136e-06	169	169
KTELC1	-0.401816	6.13561e-08	1.15992e-06	169	169
SUZ12	-0.4017	6.19418e-08	1.16985e-06	169	169
RPRD1A	-0.4015	6.2974e-08	1.18819e-06	169	169
FAM161A	-0.401189	6.46006e-08	1.21417e-06	169	169
MIA3	-0.401116	6.49925e-08	1.22035e-06	169	169
LIG3	-0.401059	6.52946e-08	1.22484e-06	169	169
DNAJC25	-0.400951	6.58765e-08	1.23338e-06	169	169
DSCC1	-0.400652	6.75174e-08	1.25804e-06	169	169
TRMT5	-0.400524	6.82261e-08	1.26881e-06	169	169
PREPL	-0.400329	6.93247e-08	1.2848e-06	169	169
RBBP4	-0.400325	6.93502e-08	1.2848e-06	169	169
TRAM1	-0.400072	7.08004e-08	1.30917e-06	169	169
TMX1	-0.400037	7.10042e-08	1.31169e-06	169	169
TTC30A	-0.400023	7.10859e-08	1.31195e-06	169	169
TXNL1	-0.39989	7.18638e-08	1.32505e-06	169	169
METTL14	-0.399866	7.20081e-08	1.32508e-06	169	169
NCL	-0.399844	7.21381e-08	1.32508e-06	169	169
RBM34	-0.399762	7.26188e-08	1.33128e-06	169	169
ERLEC1	-0.399732	7.27997e-08	1.33219e-06	169	169
FAM3C	-0.399583	7.36919e-08	1.34472e-06	169	169
TSEN15	-0.399466	7.43985e-08	1.35634e-06	169	169
KDM5B	-0.399335	7.52012e-08	1.36713e-06	169	169
CDC27	-0.399306	7.53799e-08	1.3691e-06	169	169
TAF5L	-0.399172	7.62083e-08	1.38285e-06	169	169
PTPRF	-0.398658	7.94703e-08	1.43534e-06	169	169
ACN9	-0.398629	7.96586e-08	1.43741e-06	169	169
DDX50	-0.398507	8.04572e-08	1.45047e-06	169	169
ABCC8	-0.398405	8.11238e-08	1.46113e-06	169	57
TTC37	-0.398331	8.16169e-08	1.46865e-06	169	169
NUFIP1	-0.39821	8.2424e-08	1.48043e-06	169	169
C4orf46	-0.397599	8.66256e-08	1.54874e-06	169	169
WDR12	-0.397558	8.69133e-08	1.55246e-06	169	169
MRPL45	-0.397333	8.85164e-08	1.5753e-06	169	169
DPY19L3	-0.396847	9.20723e-08	1.63409e-06	169	169
NFYA	-0.396647	9.35739e-08	1.65772e-06	169	169
TXNDC5	-0.396493	9.47467e-08	1.67697e-06	169	169
NTRK3	-0.396422	9.52978e-08	1.68257e-06	169	108
AUH	-0.396418	9.53229e-08	1.68257e-06	169	169
ZNF451	-0.396348	9.58666e-08	1.69063e-06	169	169
SFPQ	-0.395733	1.00749e-07	1.77031e-06	169	169
ELAVL1	-0.395477	1.02857e-07	1.80083e-06	169	169
SEC23A	-0.395173	1.05402e-07	1.83877e-06	169	169
PCCB	-0.395127	1.05799e-07	1.84404e-06	169	169
OGFOD1	-0.395065	1.06323e-07	1.84984e-06	169	169
DPY19L4	-0.394891	1.07828e-07	1.86976e-06	169	169
STMN1	-0.394888	1.07852e-07	1.86976e-06	169	169
NIP7	-0.394809	1.08544e-07	1.88008e-06	169	169
HIBCH	-0.394786	1.08738e-07	1.88175e-06	169	169
RLIM	-0.394589	1.10482e-07	1.90633e-06	169	169
SENP5	-0.394583	1.10532e-07	1.90633e-06	169	169
EFHA1	-0.394581	1.1055e-07	1.90633e-06	169	169
MGA	-0.394488	1.11381e-07	1.91758e-06	169	169
DNTTIP2	-0.394486	1.114e-07	1.91758e-06	169	169
ABCB10	-0.394095	1.1495e-07	1.97345e-06	169	169
BCLAF1	-0.393978	1.16034e-07	1.9903e-06	169	169
MDM1	-0.393862	1.17119e-07	2.00536e-06	169	169
ATP12A	-0.393432	1.21224e-07	2.07018e-06	169	70
CCDC41	-0.39341	1.21446e-07	2.07069e-06	169	169
ADAL	-0.39337	1.21829e-07	2.07504e-06	169	169
CMPK1	-0.393219	1.23313e-07	2.09664e-06	169	169
GFM2	-0.393062	1.24878e-07	2.11617e-06	169	169
NME7	-0.393055	1.24939e-07	2.11617e-06	169	169
TTLL5	-0.392896	1.26539e-07	2.13469e-06	169	169
APOOL	-0.392835	1.27157e-07	2.14001e-06	169	169
NAA35	-0.392826	1.27252e-07	2.14001e-06	169	169
GOLPH3L	-0.392811	1.27406e-07	2.14001e-06	169	169
HLTF	-0.392789	1.27625e-07	2.14001e-06	169	169
GNL3	-0.392629	1.2927e-07	2.16069e-06	169	169
TCFL5	-0.392626	1.29303e-07	2.16069e-06	169	169
RNMT	-0.392604	1.29529e-07	2.16261e-06	169	169
ZNF77	-0.39259	1.29676e-07	2.16319e-06	169	169
MRPL42	-0.392336	1.32337e-07	2.20381e-06	169	169
XPO1	-0.392317	1.32535e-07	2.20522e-06	169	169
ARF4	-0.392265	1.3308e-07	2.21057e-06	169	169
KDELR3	-0.392137	1.3445e-07	2.22945e-06	169	169
CCDC25	-0.39202	1.35708e-07	2.24838e-06	169	169
DNM1L	-0.391991	1.36021e-07	2.25164e-06	169	169
MST4	-0.391918	1.36819e-07	2.26292e-06	169	169
EPRS	-0.391853	1.37524e-07	2.27266e-06	169	169
VDAC1	-0.391803	1.38074e-07	2.2798e-06	169	169
SPATA9	-0.391449	1.42029e-07	2.34113e-06	169	166
DDX46	-0.391344	1.43213e-07	2.35625e-06	169	169
ZNF323	-0.391336	1.4331e-07	2.35625e-06	169	169
CHRNA6	-0.39131	1.43603e-07	2.35908e-06	169	118
PHF10	-0.391139	1.45573e-07	2.38539e-06	169	169
F3	-0.391084	1.46205e-07	2.39373e-06	169	160
EIF2AK3	-0.390999	1.47202e-07	2.40801e-06	169	169
SLC26A9	-0.390949	1.47785e-07	2.41552e-06	169	109
TCEA1	-0.390892	1.48463e-07	2.42456e-06	169	169
GIGYF2	-0.390786	1.49714e-07	2.43884e-06	169	169
RG9MTD2	-0.390755	1.5008e-07	2.44254e-06	169	169
SLC33A1	-0.390725	1.50443e-07	2.44254e-06	169	169
ACO1	-0.390707	1.5065e-07	2.44386e-06	169	169
KLHL20	-0.390621	1.5169e-07	2.4585e-06	169	169
MRPS18C	-0.390611	1.51806e-07	2.4585e-06	169	169
SLC30A7	-0.39055	1.52542e-07	2.46836e-06	169	169
NMD3	-0.390361	1.54845e-07	2.50354e-06	169	169
NNMT	-0.390274	1.5592e-07	2.51883e-06	169	151
AZI2	-0.390248	1.56237e-07	2.52185e-06	169	169
PCBD2	-0.390216	1.56633e-07	2.52614e-06	169	169
ARPP19	-0.39004	1.58843e-07	2.55754e-06	169	169
LOC144438	-0.389946	1.60021e-07	2.57225e-06	169	169
NGEF	-0.389904	1.60559e-07	2.57877e-06	169	126
C14orf104	-0.389652	1.63788e-07	2.62846e-06	169	169
PRPF4B	-0.389603	1.64426e-07	2.63434e-06	169	169
MAP1A	-0.389509	1.65657e-07	2.65068e-06	169	169
C10orf4	-0.389504	1.65719e-07	2.65068e-06	169	169
CLUAP1	-0.389486	1.65963e-07	2.6524e-06	169	169
LASS1	-0.389466	1.66221e-07	2.65415e-06	169	168
GEMIN5	-0.389185	1.69953e-07	2.70505e-06	169	169
FBN3	-0.389171	1.70143e-07	2.70585e-06	169	74
LOC729176	-0.38901	1.72311e-07	2.73363e-06	169	169
RPL7L1	-0.388793	1.75299e-07	2.77649e-06	169	169
C6orf72	-0.38871	1.76442e-07	2.79005e-06	169	169
PNPT1	-0.388271	1.82659e-07	2.88366e-06	169	169
CENPC1	-0.388087	1.85318e-07	2.92091e-06	169	169
C7orf54	-0.387973	1.86985e-07	2.94151e-06	169	169
SNRPE	-0.387808	1.89442e-07	2.97384e-06	169	169
R3HDM1	-0.387562	1.93129e-07	3.02683e-06	169	169
IMPAD1	-0.387397	1.95645e-07	3.06133e-06	169	169
OSGEPL1	-0.387129	1.99807e-07	3.11391e-06	169	169
POLR3B	-0.387105	2.00193e-07	3.11648e-06	169	169
NACA2	-0.387098	2.00293e-07	3.11648e-06	169	169
ITGB3BP	-0.386943	2.02748e-07	3.14965e-06	169	169
PUS7	-0.38688	2.03758e-07	3.15776e-06	169	169
ADH5	-0.38677	2.05508e-07	3.18234e-06	169	169
TSGA14	-0.386643	2.07572e-07	3.20663e-06	169	169
ALDH18A1	-0.386284	2.13492e-07	3.29024e-06	169	169
ABCE1	-0.38603	2.17766e-07	3.34551e-06	169	169
BLZF1	-0.385949	2.19152e-07	3.36413e-06	169	169
ACBD3	-0.385918	2.19686e-07	3.36968e-06	169	169
ST13	-0.385883	2.20288e-07	3.37624e-06	169	169
CENPF	-0.385806	2.21613e-07	3.3912e-06	169	169
NARS2	-0.385754	2.22525e-07	3.40247e-06	169	169
ACADM	-0.385617	2.24902e-07	3.43342e-06	169	169
LOC653566	-0.385338	2.29863e-07	3.49885e-06	169	169
GOLGB1	-0.385289	2.30736e-07	3.49885e-06	169	169
FASTKD2	-0.385285	2.30808e-07	3.49885e-06	169	169
FKBP7	-0.385014	2.35736e-07	3.56243e-06	169	169
PWP1	-0.384961	2.36709e-07	3.57436e-06	169	169
CTDSPL2	-0.384937	2.37148e-07	3.57821e-06	169	169
METAP2	-0.384919	2.37495e-07	3.58067e-06	169	169
MSH2	-0.384762	2.4042e-07	3.61914e-06	169	169
ADAMTS20	-0.384582	2.43807e-07	3.66446e-06	169	19
FAM179B	-0.384483	2.45679e-07	3.68974e-06	169	169
BCAP29	-0.384273	2.49721e-07	3.73818e-06	169	169
EIF5	-0.384257	2.50031e-07	3.73818e-06	169	169
DUS4L	-0.384256	2.50058e-07	3.73818e-06	169	169
TYRO3	-0.383993	2.55227e-07	3.80831e-06	169	166
ATP7B	-0.383849	2.58085e-07	3.83762e-06	169	169
RAB6B	-0.383631	2.62498e-07	3.89717e-06	169	169
LSM5	-0.383344	2.68398e-07	3.97517e-06	169	169
SCCPDH	-0.383091	2.73712e-07	4.04511e-06	169	169
EFCAB10	-0.382989	2.75872e-07	4.07394e-06	169	169
C16orf63	-0.382866	2.78516e-07	4.10985e-06	169	169
PPPDE1	-0.382838	2.7911e-07	4.1155e-06	169	169
EEF2K	-0.382792	2.80107e-07	4.12706e-06	169	169
BEND6	-0.382761	2.80778e-07	4.13382e-06	169	159
ANXA8L2	-0.382647	2.83266e-07	4.16729e-06	169	110
CDH24	-0.382583	2.84667e-07	4.18288e-06	169	169
SRD5A3	-0.382552	2.85347e-07	4.1884e-06	169	169
GRINL1A	-0.382215	2.92875e-07	4.28917e-06	169	169
HSPA4	-0.382048	2.96683e-07	4.33214e-06	169	169
AKD1	-0.382047	2.96701e-07	4.33214e-06	169	169
KRT16	-0.381943	2.991e-07	4.36062e-06	169	16
C11orf54	-0.381858	3.01067e-07	4.38601e-06	169	169
TNKS1BP1	-0.381831	3.01688e-07	4.39177e-06	169	169
ADAMTS15	-0.381783	3.028e-07	4.39806e-06	169	82
EFTUD1	-0.381602	3.07063e-07	4.45235e-06	169	169
MYT1L	-0.381595	3.07224e-07	4.45235e-06	169	56
BEND3	-0.381418	3.11431e-07	4.50659e-06	169	169
CLDN12	-0.381373	3.12508e-07	4.51544e-06	169	169
MXRA7	-0.381353	3.12994e-07	4.51783e-06	169	169
DCP2	-0.381347	3.13138e-07	4.51783e-06	169	169
RHOBTB3	-0.381328	3.13608e-07	4.51944e-06	169	169
SIN3A	-0.381323	3.1372e-07	4.51944e-06	169	169
RSRC2	-0.381314	3.13947e-07	4.51944e-06	169	169
DIS3	-0.381224	3.16126e-07	4.54743e-06	169	169
FNDC3A	-0.381205	3.16594e-07	4.5508e-06	169	169
TPM4	-0.381162	3.1764e-07	4.56247e-06	169	169
GNE	-0.381121	3.18644e-07	4.57351e-06	169	169
RIOK1	-0.381031	3.20859e-07	4.59558e-06	169	169
SASS6	-0.381029	3.20891e-07	4.59558e-06	169	169
LOC100130264	-0.380927	3.23434e-07	4.62517e-06	169	137
GRID1	-0.380878	3.2465e-07	4.63915e-06	169	96
JPH1	-0.38065	3.3038e-07	4.7141e-06	169	108
ZCCHC10	-0.380493	3.34384e-07	4.76075e-06	169	169
SLC30A3	-0.380379	3.37317e-07	4.79198e-06	169	117
SLC30A6	-0.380279	3.3992e-07	4.82543e-06	169	169
C17orf58	-0.380246	3.40776e-07	4.83404e-06	169	169
LOC643387	-0.38019	3.4226e-07	4.85155e-06	169	169
HNRNPA1	-0.380064	3.45575e-07	4.89141e-06	169	169
C15orf44	-0.380027	3.46552e-07	4.90167e-06	169	169
LYG2	-0.379982	3.4776e-07	4.91518e-06	169	163
ADSS	-0.379921	3.49384e-07	4.93095e-06	169	169
UTP18	-0.379879	3.50496e-07	4.94306e-06	169	169
CNOT6	-0.379819	3.52124e-07	4.96242e-06	169	169
INSR	-0.379799	3.52646e-07	4.96618e-06	169	169
TP53BP1	-0.379785	3.53044e-07	4.96818e-06	169	169
RGS9BP	-0.379756	3.5382e-07	4.97363e-06	169	165
UFM1	-0.379751	3.53943e-07	4.97363e-06	169	169
SLC17A2	-0.379626	3.57358e-07	5.01074e-06	169	30
SMS	-0.379424	3.62919e-07	5.07095e-06	169	169
PIGX	-0.379298	3.66441e-07	5.1013e-06	169	169
SCRN3	-0.379127	3.71256e-07	5.16464e-06	169	169
POLR3F	-0.379058	3.73204e-07	5.18061e-06	169	169
HSP90B3P	-0.379035	3.73875e-07	5.18622e-06	169	168
MAGI3	-0.378989	3.75189e-07	5.20072e-06	169	169
CWC27	-0.378906	3.77571e-07	5.23002e-06	169	169
CATSPER2P1	-0.378691	3.83829e-07	5.30536e-06	169	169
TMCO1	-0.378598	3.86544e-07	5.33909e-06	169	169
PMS1	-0.378582	3.87025e-07	5.34194e-06	169	169
HDAC2	-0.378505	3.89312e-07	5.36968e-06	169	169
WDR43	-0.378411	3.92111e-07	5.40063e-06	169	169
NUP43	-0.378308	3.95194e-07	5.43923e-06	169	169
KDELC2	-0.378122	4.00842e-07	5.50917e-06	169	169
HNRNPU	-0.378023	4.03857e-07	5.54276e-06	169	169
CSDE1	-0.377969	4.05514e-07	5.55592e-06	169	169
ZNF660	-0.377964	4.05673e-07	5.55592e-06	169	169
ZRANB3	-0.377942	4.06371e-07	5.55764e-06	169	169
PDS5A	-0.37793	4.06732e-07	5.55867e-06	169	169
ZMPSTE24	-0.377795	4.10919e-07	5.61194e-06	169	169
PIWIL3	-0.377729	4.13003e-07	5.63644e-06	169	73
CRNKL1	-0.377529	4.19328e-07	5.71474e-06	169	169
CNIH3	-0.377084	4.33746e-07	5.89883e-06	169	142
LIN52	-0.376874	4.40695e-07	5.98496e-06	169	169
C7orf64	-0.376824	4.42382e-07	6.00367e-06	169	169
TRIM33	-0.376768	4.44255e-07	6.01898e-06	169	169
SLC39A11	-0.376753	4.44749e-07	6.01898e-06	169	169
PSMD10	-0.376593	4.50173e-07	6.08391e-06	169	169
STT3A	-0.376475	4.5421e-07	6.12995e-06	169	169
UBXN8	-0.376148	4.65606e-07	6.27938e-06	169	169
SEC61G	-0.37554	4.87496e-07	6.5564e-06	169	169
LUC7L2	-0.375513	4.88503e-07	6.5654e-06	169	169
MSH3	-0.375448	4.90894e-07	6.58489e-06	169	169
OSBPL9	-0.375422	4.91847e-07	6.59211e-06	169	169
SLC20A2	-0.375259	4.9794e-07	6.66917e-06	169	169
CASKIN1	-0.375237	4.98776e-07	6.66952e-06	169	159
PARD6G	-0.37523	4.99011e-07	6.66952e-06	169	169
ARL6	-0.374879	5.1241e-07	6.83471e-06	169	169
LOC148145	-0.374842	5.13817e-07	6.84878e-06	169	41
SLC25A15	-0.374814	5.14904e-07	6.85857e-06	169	169
FAM10A4	-0.374672	5.20465e-07	6.91841e-06	169	169
FAM35A	-0.374455	5.29018e-07	7.0225e-06	169	169
CCDC104	-0.374426	5.30172e-07	7.03301e-06	169	169
PACRGL	-0.374313	5.34688e-07	7.08325e-06	169	169
HSD17B6	-0.374225	5.38251e-07	7.12551e-06	169	160
GUF1	-0.374216	5.38611e-07	7.12551e-06	169	169
HS2ST1	-0.374072	5.44484e-07	7.19341e-06	169	169
ZNF569	-0.373978	5.4833e-07	7.23439e-06	169	169
UBE2K	-0.37395	5.49481e-07	7.23654e-06	169	169
ECT2	-0.373936	5.50054e-07	7.23654e-06	169	169
SMYD1	-0.373934	5.50161e-07	7.23654e-06	169	28
SPCS3	-0.373909	5.51195e-07	7.24268e-06	169	169
MTBP	-0.373889	5.52025e-07	7.24355e-06	169	169
BCAS2	-0.373883	5.52256e-07	7.24355e-06	169	169
CCRN4L	-0.37388	5.52379e-07	7.24355e-06	169	169
KDSR	-0.373827	5.54583e-07	7.26265e-06	169	169
PAQR3	-0.373717	5.59159e-07	7.31272e-06	169	169
ARMCX1	-0.373563	5.65687e-07	7.38814e-06	169	169
NCRNA00029	-0.373494	5.68587e-07	7.41605e-06	169	27
SMARCC1	-0.373394	5.72892e-07	7.4572e-06	169	169
TMED7	-0.373385	5.73277e-07	7.4572e-06	169	169
STXBP1	-0.373075	5.86733e-07	7.60679e-06	169	169
TMEM126A	-0.373008	5.89708e-07	7.63516e-06	169	169
AUTS2	-0.372918	5.93661e-07	7.67612e-06	169	169
CLASP1	-0.372892	5.9483e-07	7.68612e-06	169	169
ZNF271	-0.372834	5.9743e-07	7.71459e-06	169	169
IARS	-0.372817	5.98191e-07	7.71556e-06	169	169
IPO11	-0.372814	5.98299e-07	7.71556e-06	169	169
CHRNB1	-0.372767	6.00401e-07	7.73753e-06	169	169
MLEC	-0.372744	6.01436e-07	7.74573e-06	169	169
NUBPL	-0.372646	6.05856e-07	7.79428e-06	169	169
NDUFS1	-0.372643	6.06008e-07	7.79428e-06	169	169
HNRNPH3	-0.37263	6.06593e-07	7.79664e-06	169	169
TXLNG	-0.37261	6.0752e-07	7.8034e-06	169	169
ZNF614	-0.372541	6.10646e-07	7.83837e-06	169	169
HHIP	-0.372437	6.15388e-07	7.88362e-06	169	145
MBTPS2	-0.372352	6.19343e-07	7.92648e-06	169	169
SSR3	-0.372235	6.24762e-07	7.97892e-06	169	169
PDGFA	-0.372233	6.2488e-07	7.97892e-06	169	161
BRMS1L	-0.372025	6.34656e-07	8.09311e-06	169	169
KIAA0776	-0.371728	6.48852e-07	8.25789e-06	169	169
PODXL	-0.371357	6.67001e-07	8.47222e-06	169	169
SLC29A4	-0.371215	6.74114e-07	8.55697e-06	169	166
RAD21	-0.371167	6.76532e-07	8.58206e-06	169	169
SLC27A2	-0.371043	6.82781e-07	8.65569e-06	169	169
VANGL2	-0.370976	6.8619e-07	8.69323e-06	169	167
TXNL4B	-0.370892	6.90485e-07	8.74195e-06	169	169
COX11	-0.37078	6.96265e-07	8.80939e-06	169	169
LOC100132724	-0.370381	7.17174e-07	9.05624e-06	169	169
GYG2	-0.370357	7.18451e-07	9.06582e-06	169	165
UCHL5	-0.37035	7.18865e-07	9.06582e-06	169	169
TMEM52	-0.370318	7.20545e-07	9.08111e-06	169	138
ABI2	-0.370139	7.30193e-07	9.19675e-06	169	169
PSMA2	-0.370115	7.31471e-07	9.20091e-06	169	169
ZNF627	-0.370106	7.31976e-07	9.20131e-06	169	169
GNPAT	-0.369977	7.38993e-07	9.26939e-06	169	169
RSL24D1	-0.369961	7.39878e-07	9.27066e-06	169	169
TSEN2	-0.369931	7.41546e-07	9.28557e-06	169	169
RPL7	-0.369887	7.4396e-07	9.3098e-06	169	169
ZNF92	-0.369812	7.48079e-07	9.34931e-06	169	169
CDK7	-0.369773	7.50245e-07	9.36611e-06	169	169
MT1L	-0.369771	7.50388e-07	9.36611e-06	169	75
MAP1B	-0.369689	7.54918e-07	9.41661e-06	169	169
AP4E1	-0.369674	7.55791e-07	9.42145e-06	169	169
DCAF6	-0.369568	7.61718e-07	9.4771e-06	169	169
GMCL1L	-0.369424	7.69857e-07	9.57223e-06	169	167
PLDN	-0.369406	7.70909e-07	9.57919e-06	169	169
GBE1	-0.36927	7.78697e-07	9.6636e-06	169	169
WDR19	-0.3692	7.8276e-07	9.70782e-06	169	169
TBCCD1	-0.368966	7.96355e-07	9.85128e-06	169	169
HNRNPA2B1	-0.368713	8.11381e-07	1.0018e-05	169	169
SLC24A3	-0.368618	8.17094e-07	1.00694e-05	169	158
GTPBP4	-0.368553	8.21029e-07	1.01115e-05	169	169
MUTED	-0.368518	8.23135e-07	1.01246e-05	169	169
FCF1	-0.368439	8.27979e-07	1.01777e-05	169	169
NUP107	-0.368367	8.32357e-07	1.02217e-05	169	169
SRP9	-0.368363	8.32613e-07	1.02217e-05	169	169
SMC2	-0.368315	8.35544e-07	1.02512e-05	169	169
GOLGA7	-0.368215	8.41757e-07	1.0321e-05	169	169
OSTBETA	-0.368178	8.44025e-07	1.03357e-05	169	9
CSE1L	-0.368167	8.44715e-07	1.03376e-05	169	169
ZWILCH	-0.368154	8.45501e-07	1.03408e-05	169	169
UBA2	-0.367953	8.58152e-07	1.04757e-05	169	169
MBLAC2	-0.367892	8.62008e-07	1.05096e-05	169	169
SPG20	-0.367876	8.62969e-07	1.05147e-05	169	169
GSG1	-0.367865	8.63681e-07	1.05168e-05	169	141
HSD17B11	-0.367796	8.68083e-07	1.05571e-05	169	169
ETAA1	-0.367412	8.92972e-07	1.08395e-05	169	169
SMARCE1	-0.367236	9.0454e-07	1.09662e-05	169	169
CACYBP	-0.367194	9.07346e-07	1.09934e-05	169	169
C4orf38	-0.367083	9.14781e-07	1.10697e-05	169	74
DLAT	-0.367062	9.16167e-07	1.10718e-05	169	169
SLC38A3	-0.367021	9.18926e-07	1.10922e-05	169	69
SUPT16H	-0.366975	9.22071e-07	1.11232e-05	169	169
PGRMC2	-0.366944	9.24171e-07	1.1139e-05	169	169
DCAF10	-0.36693	9.25097e-07	1.1139e-05	169	169
GAR1	-0.36675	9.37413e-07	1.12663e-05	169	169
CYCS	-0.366677	9.42378e-07	1.1319e-05	169	169
PDIA5	-0.366653	9.44044e-07	1.1332e-05	169	169
TWSG1	-0.366636	9.45248e-07	1.13395e-05	169	169
TMED8	-0.366549	9.5129e-07	1.14049e-05	169	169
TBC1D15	-0.366395	9.62103e-07	1.15203e-05	169	169
SIP1	-0.366363	9.64309e-07	1.15396e-05	169	169
C20orf177	-0.366294	9.69239e-07	1.1577e-05	169	169
TRA2B	-0.366286	9.69811e-07	1.1577e-05	169	169
ZNF37A	-0.366125	9.81278e-07	1.16819e-05	169	169
ZNF326	-0.36612	9.8161e-07	1.16819e-05	169	169
MIER1	-0.366111	9.82282e-07	1.16828e-05	169	169
CENPQ	-0.365566	1.02216e-06	1.21273e-05	169	169
SLC28A3	-0.365547	1.02361e-06	1.21372e-05	169	134
UGT3A1	-0.36548	1.0286e-06	1.21815e-05	169	46
RBMXL1	-0.365412	1.03376e-06	1.22351e-05	169	169
G2E3	-0.365231	1.04748e-06	1.23824e-05	169	169
CCDC15	-0.365125	1.05558e-06	1.2463e-05	169	169
ATL2	-0.364837	1.07798e-06	1.26889e-05	169	169
MPP5	-0.364439	1.10963e-06	1.30458e-05	169	169
RAD18	-0.364195	1.12953e-06	1.32539e-05	169	169
PAFAH1B2	-0.364188	1.13006e-06	1.32539e-05	169	169
GART	-0.364047	1.14171e-06	1.33824e-05	169	169
HSDL1	-0.364025	1.14352e-06	1.33955e-05	169	169
HMGB1	-0.364013	1.14453e-06	1.33993e-05	169	169
TMEM17	-0.363986	1.14677e-06	1.34093e-05	169	169
TADA1	-0.363918	1.1525e-06	1.34682e-05	169	169
SMN2	-0.363876	1.15595e-06	1.3497e-05	169	169
SLC39A8	-0.363872	1.15635e-06	1.3497e-05	169	169
COX7A2L	-0.36374	1.16748e-06	1.36187e-05	169	169
NACAP1	-0.363642	1.1758e-06	1.36829e-05	169	169
PACSIN3	-0.363595	1.17979e-06	1.37212e-05	169	164
NDC80	-0.363548	1.18383e-06	1.376e-05	169	169
DHX36	-0.363375	1.19877e-06	1.39252e-05	169	169
DPH3B	-0.363345	1.20132e-06	1.39465e-05	169	168
CRLS1	-0.363189	1.21499e-06	1.408e-05	169	169
RBBP6	-0.363121	1.221e-06	1.41328e-05	169	169
PITPNB	-0.362885	1.24203e-06	1.43526e-05	169	169
SEMA3G	-0.36285	1.24521e-06	1.43788e-05	169	167
GPBP1	-0.362763	1.25305e-06	1.44521e-05	169	169
SH3YL1	-0.362666	1.2619e-06	1.45455e-05	169	169
HTATSF1	-0.362568	1.27081e-06	1.46076e-05	169	169
SULT1C2	-0.362566	1.27104e-06	1.46076e-05	169	114
ARMC4	-0.362389	1.2874e-06	1.47868e-05	169	93
NDUFS4	-0.362336	1.29236e-06	1.4835e-05	169	169
GPX5	-0.362233	1.30194e-06	1.49273e-05	169	6
REV1	-0.362222	1.30298e-06	1.49305e-05	169	169
CFL2	-0.362189	1.30612e-06	1.49576e-05	169	169
XPO4	-0.362166	1.3083e-06	1.49738e-05	169	169
REEP2	-0.361878	1.33573e-06	1.52428e-05	169	141
GTF3C3	-0.36183	1.34039e-06	1.5287e-05	169	169
ATP2C1	-0.361719	1.35117e-06	1.53829e-05	169	169
HNRNPA1L2	-0.361669	1.35598e-06	1.54233e-05	169	169
B4GALT2	-0.361519	1.37076e-06	1.55785e-05	169	169
SMC3	-0.361505	1.3721e-06	1.55847e-05	169	169
RPP40	-0.361383	1.38427e-06	1.57045e-05	169	169
MTR	-0.361217	1.40082e-06	1.58461e-05	169	169
CETN3	-0.361202	1.40236e-06	1.58543e-05	169	169
ATP13A3	-0.361111	1.41156e-06	1.59374e-05	169	169
TNPO1	-0.361105	1.41213e-06	1.59374e-05	169	169
RARS	-0.361105	1.41218e-06	1.59374e-05	169	169
LRPPRC	-0.360996	1.4233e-06	1.60444e-05	169	169
COL27A1	-0.36097	1.42595e-06	1.60649e-05	169	158
PDCL3	-0.360811	1.44231e-06	1.62398e-05	169	169
ALS2CR4	-0.360694	1.45445e-06	1.6367e-05	169	169
EIF3E	-0.360605	1.46383e-06	1.64535e-05	169	169
TAF2	-0.360513	1.47355e-06	1.65458e-05	169	169
AMMECR1L	-0.360511	1.47375e-06	1.65458e-05	169	169
C1orf27	-0.360488	1.47617e-06	1.65634e-05	169	169
RREB1	-0.360366	1.48916e-06	1.66996e-05	169	169
LYRM2	-0.360223	1.50451e-06	1.68522e-05	169	169
TMEM64	-0.360215	1.5054e-06	1.68525e-05	169	169
METT5D1	-0.360006	1.52805e-06	1.70667e-05	169	169
ITGB1BP1	-0.359956	1.53358e-06	1.71133e-05	169	169
FAM13B	-0.359952	1.53398e-06	1.71133e-05	169	169
FUBP3	-0.35993	1.53641e-06	1.71306e-05	169	169
SAAL1	-0.359918	1.53778e-06	1.7136e-05	169	169
HMMR	-0.359873	1.54274e-06	1.71814e-05	169	169
TTC25	-0.359679	1.5643e-06	1.74016e-05	169	169
DDX47	-0.359659	1.56655e-06	1.74166e-05	169	169
GOLT1B	-0.359615	1.57142e-06	1.74608e-05	169	169
SMEK2	-0.35953	1.58105e-06	1.75277e-05	169	169
NUP205	-0.359513	1.58301e-06	1.75364e-05	169	169
ETF1	-0.359507	1.58364e-06	1.75364e-05	169	169
ZNF566	-0.359337	1.60299e-06	1.77406e-05	169	169
KTN1	-0.359267	1.61109e-06	1.78e-05	169	169
ALDH6A1	-0.359266	1.6111e-06	1.78e-05	169	169
MED21	-0.359095	1.63099e-06	1.79891e-05	169	169
AASDHPPT	-0.358996	1.64256e-06	1.80653e-05	169	169
CAPRIN1	-0.358881	1.65613e-06	1.82043e-05	169	169
ZW10	-0.358869	1.65753e-06	1.82061e-05	169	169
PGBD1	-0.358863	1.65816e-06	1.82061e-05	169	169
MOBKL3	-0.358854	1.65932e-06	1.82085e-05	169	169
THOC2	-0.358844	1.6605e-06	1.82112e-05	169	169
KIAA1549	-0.35863	1.68603e-06	1.84391e-05	169	169
TPRKB	-0.358608	1.68865e-06	1.84506e-05	169	169
UHRF2	-0.358602	1.68937e-06	1.84506e-05	169	169
KIAA0802	-0.358596	1.69007e-06	1.84506e-05	169	169
SCOC	-0.358555	1.69499e-06	1.84851e-05	169	169
ANXA8	-0.358433	1.70978e-06	1.86359e-05	169	143
GABRE	-0.358423	1.71105e-06	1.86393e-05	169	138
NAPG	-0.358308	1.72517e-06	1.87616e-05	169	169
POLE3	-0.358224	1.7355e-06	1.88633e-05	169	169
SLC38A2	-0.358206	1.73772e-06	1.88685e-05	169	169
TAX1BP1	-0.358204	1.73791e-06	1.88685e-05	169	169
LOC728264	-0.358035	1.75896e-06	1.90863e-05	169	162
FARSB	-0.357961	1.76831e-06	1.91674e-05	169	169
SIRT1	-0.35796	1.7684e-06	1.91674e-05	169	169
NCRNA00188	-0.357864	1.78046e-06	1.92765e-05	169	169
PEX1	-0.357667	1.80565e-06	1.9495e-05	169	169
RAB4A	-0.357582	1.81653e-06	1.96002e-05	169	169
ADAMTS1	-0.357575	1.81741e-06	1.96002e-05	169	161
PAPLN	-0.357507	1.8262e-06	1.96841e-05	169	169
SEPT7	-0.357457	1.83278e-06	1.9744e-05	169	169
BHLHE23	-0.357381	1.84272e-06	1.98291e-05	169	54
SARNP	-0.357151	1.87299e-06	2.01103e-05	169	169
KIAA1429	-0.357027	1.88957e-06	2.02548e-05	169	169
PSMD12	-0.356898	1.90688e-06	2.04291e-05	169	169
ZNF20	-0.356749	1.9272e-06	2.06126e-05	169	169
BCCIP	-0.356613	1.94578e-06	2.07999e-05	169	169
CCDC90B	-0.356532	1.95706e-06	2.09091e-05	169	169
EDEM3	-0.356503	1.96103e-06	2.09399e-05	169	169
GXYLT2	-0.35638	1.97816e-06	2.10929e-05	169	140
GARS	-0.3563	1.98946e-06	2.11853e-05	169	169
COG6	-0.356276	1.99282e-06	2.12094e-05	169	169
SLC3A1	-0.356256	1.9956e-06	2.12274e-05	169	169
TMX4	-0.356201	2.0034e-06	2.12988e-05	169	169
KIAA0391	-0.355941	2.04048e-06	2.16338e-05	169	169
FAM101A	-0.355867	2.05124e-06	2.1736e-05	169	157
MEG3	-0.35578	2.06393e-06	2.18586e-05	169	131
PRELID2	-0.355547	2.0981e-06	2.21842e-05	169	169
KRT17	-0.355458	2.11135e-06	2.22894e-05	169	119
RBM26	-0.355457	2.1115e-06	2.22894e-05	169	169
EIF1AX	-0.355429	2.11565e-06	2.23212e-05	169	169
RAB38	-0.355383	2.12246e-06	2.23687e-05	169	169
WBP4	-0.355092	2.16647e-06	2.28078e-05	169	169
DDX21	-0.355023	2.177e-06	2.29049e-05	169	169
NLGN1	-0.354898	2.19636e-06	2.306e-05	169	92
PMPCB	-0.354742	2.22052e-06	2.33011e-05	169	169
USP32	-0.354732	2.22208e-06	2.33049e-05	169	169
LGR4	-0.354712	2.22516e-06	2.33246e-05	169	163
SRFBP1	-0.354505	2.25786e-06	2.36546e-05	169	169
DCBLD2	-0.354422	2.27106e-06	2.378e-05	169	169
SOCS5	-0.35408	2.32628e-06	2.42929e-05	169	169
TEPP	-0.353906	2.35486e-06	2.45649e-05	169	90
IPO7	-0.35384	2.36587e-06	2.46417e-05	169	169
SPAST	-0.353783	2.37526e-06	2.47246e-05	169	169
GNL2	-0.353713	2.38695e-06	2.48197e-05	169	169
C6orf182	-0.353305	2.45613e-06	2.54522e-05	169	169
CENPJ	-0.353301	2.45695e-06	2.54522e-05	169	169
DBT	-0.353245	2.46662e-06	2.55388e-05	169	169
ZNF750	-0.353041	2.5021e-06	2.58648e-05	169	169
HPRT1	-0.352934	2.52077e-06	2.60439e-05	169	169
C15orf29	-0.35288	2.53033e-06	2.61288e-05	169	169
AP2B1	-0.352766	2.55065e-06	2.62828e-05	169	169
ZNF197	-0.352735	2.55619e-06	2.63218e-05	169	169
TTK	-0.352729	2.55715e-06	2.63218e-05	169	169
GRB10	-0.352656	2.57037e-06	2.64439e-05	169	169
HORMAD2	-0.352468	2.60425e-06	2.675e-05	169	38
KLHL7	-0.352409	2.61493e-06	2.68455e-05	169	169
ALG8	-0.352371	2.62188e-06	2.69026e-05	169	169
SERPINE1	-0.352291	2.63662e-06	2.70253e-05	169	169
SENP6	-0.351918	2.7061e-06	2.76937e-05	169	169
TBC1D23	-0.351699	2.74768e-06	2.80842e-05	169	169
PRPF38A	-0.351644	2.75828e-06	2.81684e-05	169	169
RND2	-0.351492	2.78768e-06	2.84238e-05	169	169
MRPS35	-0.351379	2.80953e-06	2.86166e-05	169	169
C3orf26	-0.351241	2.8367e-06	2.88782e-05	169	169
EEF1E1	-0.351188	2.84708e-06	2.89536e-05	169	169
ORC5L	-0.351171	2.85044e-06	2.89725e-05	169	169
CIRH1A	-0.351075	2.86965e-06	2.91526e-05	169	169
ICA1L	-0.350977	2.88923e-06	2.9313e-05	169	169
FKBP3	-0.350973	2.88997e-06	2.9313e-05	169	169
ZNF286A	-0.350913	2.90217e-06	2.94214e-05	169	169
GABRD	-0.350851	2.9146e-06	2.9532e-05	169	113
PEX11A	-0.350787	2.92754e-06	2.96322e-05	169	169
MTM1	-0.350659	2.95379e-06	2.9856e-05	169	169
SBNO1	-0.350615	2.96265e-06	2.99252e-05	169	169
ZCCHC4	-0.350555	2.97506e-06	3.0035e-05	169	169
UBXN4	-0.350534	2.97946e-06	3.00638e-05	169	169
ADAM22	-0.350308	3.0265e-06	3.04751e-05	169	164
ZNF828	-0.350277	3.03302e-06	3.0525e-05	169	169
HAUS2	-0.350267	3.03519e-06	3.0531e-05	169	169
BRCA1	-0.350235	3.04191e-06	3.05715e-05	169	169
RUFY2	-0.350233	3.04236e-06	3.05715e-05	169	169
PAIP2	-0.350199	3.04934e-06	3.06258e-05	169	169
NKD1	-0.350024	3.08661e-06	3.0984e-05	169	167
ATG12	-0.350015	3.08847e-06	3.09867e-05	169	169
NBN	-0.349911	3.11092e-06	3.11959e-05	169	169
CDK12	-0.349693	3.15823e-06	3.16349e-05	169	169
PSMD14	-0.349686	3.15958e-06	3.16349e-05	169	169
TMEM57	-0.349535	3.1929e-06	3.19356e-05	169	169
RFC1	-0.34947	3.20725e-06	3.20626e-05	169	169
VPS54	-0.349317	3.24125e-06	3.22902e-05	169	169
NKX3-1	-0.349258	3.25455e-06	3.23644e-05	169	163
MAD2L1	-0.349253	3.25576e-06	3.23644e-05	169	169
TARSL2	-0.349145	3.28005e-06	3.25893e-05	169	169
ROBO2	-0.349054	3.3008e-06	3.27618e-05	169	47
HADHB	-0.348992	3.3149e-06	3.28851e-05	169	169
RNF139	-0.34894	3.32668e-06	3.29683e-05	169	169
WRB	-0.348909	3.33383e-06	3.30163e-05	169	169
HECTD1	-0.348902	3.3354e-06	3.30163e-05	169	169
CEP78	-0.348801	3.35885e-06	3.31855e-05	169	169
SLC25A17	-0.348577	3.41111e-06	3.36484e-05	169	169
KLHL15	-0.348475	3.43512e-06	3.38359e-05	169	169
TSR1	-0.348131	3.51739e-06	3.45586e-05	169	169
SPRY2	-0.348048	3.5376e-06	3.47396e-05	169	168
ATP6V1C2	-0.347912	3.57077e-06	3.4977e-05	169	169
ZNF432	-0.347821	3.59309e-06	3.51612e-05	169	169
PPP3CA	-0.347821	3.59319e-06	3.51612e-05	169	169
PRRT4	-0.347766	3.60678e-06	3.52586e-05	169	168
STOX2	-0.347702	3.62274e-06	3.53968e-05	169	141
AGRN	-0.347532	3.66531e-06	3.57769e-05	169	169
TMEM192	-0.347501	3.67299e-06	3.58338e-05	169	169
MAGOHB	-0.347488	3.67642e-06	3.58493e-05	169	169
C12orf41	-0.347437	3.68924e-06	3.59562e-05	169	169
MTMR7	-0.347414	3.69515e-06	3.59958e-05	169	169
PTGER3	-0.347332	3.71587e-06	3.61432e-05	169	154
ANKRD27	-0.347254	3.73575e-06	3.63185e-05	169	169
VRK1	-0.347236	3.74049e-06	3.63463e-05	169	169
C14orf37	-0.34714	3.76507e-06	3.65669e-05	169	162
C13orf37	-0.347094	3.77707e-06	3.66651e-05	169	169
TATDN1	-0.347078	3.7812e-06	3.66869e-05	169	169
UBR7	-0.346955	3.8133e-06	3.69319e-05	169	169
RPGR	-0.346954	3.81344e-06	3.69319e-05	169	169
MAPRE1	-0.346952	3.81405e-06	3.69319e-05	169	169
FBLN1	-0.34681	3.85123e-06	3.72362e-05	169	147
RSRC1	-0.346654	3.89255e-06	3.75983e-05	169	169
CCDC59	-0.34662	3.90166e-06	3.76676e-05	169	169
DHRS11	-0.346482	3.93879e-06	3.80072e-05	169	169
ZSCAN21	-0.346377	3.96712e-06	3.82616e-05	169	169
LRRC19	-0.346299	3.98818e-06	3.84456e-05	169	169
MIER3	-0.346266	3.99739e-06	3.84629e-05	169	169
CDADC1	-0.346264	3.9979e-06	3.84629e-05	169	169
SNW1	-0.345936	4.0884e-06	3.9186e-05	169	169
ZNF596	-0.345931	4.08995e-06	3.9186e-05	169	169
ARL13B	-0.345786	4.1304e-06	3.9542e-05	169	169
CDC5L	-0.345777	4.13303e-06	3.95476e-05	169	169
ERCC8	-0.345714	4.15083e-06	3.96789e-05	169	169
MED1	-0.345513	4.20817e-06	4.01935e-05	169	169
LOC728643	-0.345511	4.2088e-06	4.01935e-05	169	169
C14orf45	-0.34537	4.24928e-06	4.05403e-05	169	169
DLD	-0.345356	4.25356e-06	4.05507e-05	169	169
GRIK3	-0.345144	4.31517e-06	4.11084e-05	169	98
PCNP	-0.345087	4.33217e-06	4.12171e-05	169	169
MRPL19	-0.34508	4.33426e-06	4.12171e-05	169	169
CCAR1	-0.345077	4.33507e-06	4.12171e-05	169	169
IKBIP	-0.344909	4.38482e-06	4.16369e-05	169	169
ZNF273	-0.344906	4.38565e-06	4.16369e-05	169	169
PPAPDC1B	-0.344778	4.42403e-06	4.19603e-05	169	169
AP4S1	-0.344659	4.46006e-06	4.21785e-05	169	169
TIMM17A	-0.344475	4.51617e-06	4.26676e-05	169	169
SMARCA1	-0.344296	4.57143e-06	4.31478e-05	169	145
INTS2	-0.344196	4.60243e-06	4.34107e-05	169	169
DCLK2	-0.344084	4.63771e-06	4.36884e-05	169	164
IMMT	-0.34403	4.65482e-06	4.38284e-05	169	169
CYB5B	-0.343895	4.69747e-06	4.42085e-05	169	169
ORC4L	-0.343681	4.76606e-06	4.48106e-05	169	169
CCDC52	-0.343472	4.83417e-06	4.5429e-05	169	169
TDRD3	-0.343366	4.86898e-06	4.57119e-05	169	169
LAMC3	-0.343246	4.90842e-06	4.60378e-05	169	153
SSB	-0.34301	4.98757e-06	4.66918e-05	169	169
RASAL2	-0.342904	5.02329e-06	4.69791e-05	169	169
ANXA8L1	-0.342823	5.05093e-06	4.7187e-05	169	16
SEPSECS	-0.342783	5.06475e-06	4.72759e-05	169	169
PNO1	-0.342441	5.18305e-06	4.82873e-05	169	169
TFAP2A	-0.342255	5.24825e-06	4.88479e-05	169	113
SLC16A2	-0.342101	5.30301e-06	4.92845e-05	169	159
C5orf35	-0.342063	5.31678e-06	4.93374e-05	169	169
CUL4B	-0.342027	5.32943e-06	4.94142e-05	169	169
ZNF445	-0.342016	5.33339e-06	4.94273e-05	169	169
ACACA	-0.341918	5.36891e-06	4.97091e-05	169	169
C18orf55	-0.341795	5.41335e-06	5.00967e-05	169	169
GRPEL2	-0.341723	5.43962e-06	5.03158e-05	169	169
ITGB1	-0.341655	5.46465e-06	5.04753e-05	169	169
GOSR1	-0.341585	5.49044e-06	5.06654e-05	169	169
DTWD1	-0.341573	5.49484e-06	5.06819e-05	169	169
FAM114A2	-0.341453	5.53961e-06	5.10464e-05	169	169
AIMP1	-0.34132	5.58923e-06	5.14792e-05	169	169
ILF2	-0.341305	5.59477e-06	5.15058e-05	169	169
SET	-0.341013	5.70563e-06	5.24519e-05	169	169
ITFG1	-0.341001	5.71043e-06	5.24712e-05	169	169
PFDN4	-0.340931	5.73733e-06	5.26437e-05	169	169
PTS	-0.340752	5.80664e-06	5.32294e-05	169	169
LOC644538	-0.34074	5.81107e-06	5.32449e-05	169	168
ZNF57	-0.340715	5.82088e-06	5.33096e-05	169	169
ACP1	-0.340701	5.82643e-06	5.33353e-05	169	169
EBF3	-0.34063	5.85419e-06	5.35642e-05	169	162
GNPDA2	-0.340616	5.85969e-06	5.35893e-05	169	169
TRIL	-0.340554	5.88406e-06	5.37868e-05	169	110
MTF2	-0.340515	5.89959e-06	5.39034e-05	169	169
HAUS3	-0.340365	5.9592e-06	5.43969e-05	169	169
MPP4	-0.340315	5.97886e-06	5.45508e-05	169	143
AHCTF1	-0.340306	5.98269e-06	5.45601e-05	169	169
CCDC85C	-0.340274	5.99547e-06	5.4651e-05	169	169
PTGR1	-0.340171	6.03704e-06	5.49783e-05	169	167
CHRM5	-0.339977	6.11597e-06	5.5619e-05	169	168
EBAG9	-0.339925	6.13724e-06	5.57863e-05	169	169
ZFP1	-0.339853	6.16664e-06	5.60244e-05	169	169
UTP23	-0.339622	6.26253e-06	5.67659e-05	169	169
FBXO5	-0.339604	6.27015e-06	5.68085e-05	169	169
RAB15	-0.339555	6.29086e-06	5.69695e-05	169	169
RGN	-0.339396	6.35776e-06	5.74683e-05	169	159
EXOC6	-0.339331	6.38536e-06	5.76641e-05	169	169
METAP1	-0.339315	6.39234e-06	5.77003e-05	169	169
CDKL3	-0.339279	6.40789e-06	5.77884e-05	169	169
CCDC18	-0.339271	6.41102e-06	5.77884e-05	169	169
TFAM	-0.339217	6.4343e-06	5.79714e-05	169	169
SEPT8	-0.33918	6.45005e-06	5.80864e-05	169	169
PIKFYVE	-0.33908	6.49326e-06	5.84213e-05	169	169
NUP35	-0.339067	6.49916e-06	5.84473e-05	169	169
ZNF711	-0.33902	6.51936e-06	5.86018e-05	169	168
CADM3	-0.33894	6.55441e-06	5.88625e-05	169	82
ANP32E	-0.338914	6.56557e-06	5.89355e-05	169	169
HEATR1	-0.338822	6.6059e-06	5.92427e-05	169	169
NDRG3	-0.338765	6.63102e-06	5.94349e-05	169	169
CDC7	-0.338753	6.6365e-06	5.94349e-05	169	169
PWWP2A	-0.338697	6.66112e-06	5.96279e-05	169	169
MRS2	-0.338611	6.69945e-06	5.99434e-05	169	169
C5orf28	-0.338585	6.71109e-06	6.00199e-05	169	169
PTCD3	-0.338558	6.72295e-06	6.00651e-05	169	169
ATAD2	-0.338553	6.72541e-06	6.00651e-05	169	169
UBN2	-0.338537	6.73279e-06	6.01034e-05	169	169
C7orf44	-0.338496	6.75117e-06	6.02353e-05	169	169
SP4	-0.33849	6.75377e-06	6.02353e-05	169	169
KIF14	-0.338399	6.79446e-06	6.05636e-05	169	169
IPO5	-0.338279	6.84934e-06	6.10037e-05	169	169
KCNIP4	-0.338257	6.85919e-06	6.10634e-05	169	169
USP13	-0.33814	6.91257e-06	6.15105e-05	169	169
GOLGA4	-0.337895	7.02634e-06	6.23516e-05	169	169
UPF3B	-0.337856	7.04453e-06	6.24844e-05	169	169
CLDND1	-0.337246	7.33535e-06	6.50047e-05	169	169
NAF1	-0.337174	7.37027e-06	6.52844e-05	169	169
MBIP	-0.337118	7.39792e-06	6.54696e-05	169	169
AIG1	-0.33703	7.44114e-06	6.58221e-05	169	169
ZC3HAV1L	-0.336958	7.4765e-06	6.60147e-05	169	169
CEP97	-0.336924	7.49332e-06	6.61031e-05	169	169
LONRF1	-0.336874	7.51792e-06	6.62299e-05	169	169
DDHD2	-0.336551	7.68053e-06	6.754e-05	169	169
AGPS	-0.336544	7.68427e-06	6.75424e-05	169	169
NAE1	-0.336517	7.69758e-06	6.76288e-05	169	169
TRUB1	-0.336442	7.73622e-06	6.79179e-05	169	169
TOMM5	-0.336433	7.74038e-06	6.79179e-05	169	169
KRIT1	-0.33638	7.76772e-06	6.81218e-05	169	169
GPAM	-0.336335	7.79067e-06	6.82922e-05	169	169
F2	-0.336318	7.79943e-06	6.83382e-05	169	153
C12orf48	-0.336127	7.8988e-06	6.90532e-05	169	169
NCRNA00183	-0.335932	8.00065e-06	6.99122e-05	169	169
GRK1	-0.33587	8.03349e-06	7.01676e-05	169	41
C17orf42	-0.335651	8.15073e-06	7.1032e-05	169	169
NF2	-0.335634	8.15963e-06	7.10777e-05	169	169
ATP9B	-0.335619	8.16786e-06	7.11175e-05	169	169
HNRNPK	-0.33548	8.24301e-06	7.17396e-05	169	169
HSD17B12	-0.335268	8.3584e-06	7.26463e-05	169	169
PBRM1	-0.334759	8.6431e-06	7.49867e-05	169	169
THADA	-0.334678	8.68922e-06	7.53256e-05	169	169
DPY19L2P1	-0.334571	8.75064e-06	7.57843e-05	169	154
C6orf203	-0.334551	8.76168e-06	7.58461e-05	169	169
RWDD3	-0.334423	8.83605e-06	7.64218e-05	169	169
DNAJC2	-0.334311	8.90109e-06	7.695e-05	169	169
TERF1	-0.334247	8.93842e-06	7.72041e-05	169	169
TFB2M	-0.334238	8.94345e-06	7.72133e-05	169	169
RABEP1	-0.334126	9.00963e-06	7.76811e-05	169	169
GPR180	-0.334118	9.01463e-06	7.76897e-05	169	169
FAM177A1	-0.334075	9.04005e-06	7.78742e-05	169	169
ARHGAP11B	-0.334016	9.07494e-06	7.80982e-05	169	169
BNIP2	-0.333993	9.0888e-06	7.81557e-05	169	169
IQCK	-0.333968	9.10358e-06	7.82481e-05	169	169
C11orf58	-0.333955	9.11091e-06	7.82765e-05	169	169
NR2E3	-0.333835	9.18322e-06	7.87932e-05	169	167
CACNA1C	-0.333735	9.24355e-06	7.92759e-05	169	169
LOC723972	-0.333702	9.26313e-06	7.94014e-05	169	169
C13orf34	-0.333697	9.26636e-06	7.94014e-05	169	169
CGRRF1	-0.333682	9.27557e-06	7.94454e-05	169	169
PLK4	-0.333641	9.30061e-06	7.96247e-05	169	169
HPS3	-0.333565	9.34689e-06	7.99856e-05	169	169
REV3L	-0.333515	9.3773e-06	8.01753e-05	169	169
NUS1	-0.333491	9.39211e-06	8.02666e-05	169	169
2020-09-15	-0.333396	9.45081e-06	8.06976e-05	169	169
POSTN	-0.333392	9.45311e-06	8.06976e-05	169	61
FBXO36	-0.333389	9.45499e-06	8.06976e-05	169	169
STT3B	-0.333264	9.53267e-06	8.12535e-05	169	169
RAB3GAP2	-0.333249	9.5419e-06	8.12965e-05	169	169
DDX10	-0.333005	9.69527e-06	8.2567e-05	169	169
ASF1A	-0.332998	9.69971e-06	8.25686e-05	169	169
KDM1A	-0.332944	9.73379e-06	8.27862e-05	169	169
RSBN1L	-0.332837	9.80212e-06	8.32944e-05	169	169
WARS2	-0.332823	9.81068e-06	8.33308e-05	169	169
SSBP1	-0.332781	9.83824e-06	8.34919e-05	169	169
CDK6	-0.332667	9.9113e-06	8.40384e-05	169	169
HES3	-0.332599	9.95514e-06	8.43734e-05	169	15
GTF3C6	-0.332565	9.97726e-06	8.45023e-05	169	169
ELP2	-0.332351	1.01179e-05	8.55287e-05	169	169
ANKMY2	-0.332335	1.01282e-05	8.55597e-05	169	169
EIF2S2	-0.332294	1.01552e-05	8.56583e-05	169	169
RNF138	-0.332287	1.01602e-05	8.56627e-05	169	169
PHF13	-0.332253	1.01824e-05	8.58127e-05	169	169
GRTP1	-0.332058	1.03127e-05	8.67983e-05	169	169
LMBR1	-0.331989	1.0359e-05	8.715e-05	169	169
DNAJC16	-0.331915	1.0409e-05	8.75327e-05	169	169
MAGEA5	-0.331902	1.04179e-05	8.75697e-05	169	22
USP33	-0.331799	1.04877e-05	8.80802e-05	169	169
RRP15	-0.331772	1.05059e-05	8.81951e-05	169	169
PURB	-0.331675	1.05723e-05	8.87141e-05	169	169
ACSM3	-0.331451	1.07274e-05	8.98602e-05	169	169
USP1	-0.331433	1.07399e-05	8.99264e-05	169	169
PBK	-0.331387	1.07724e-05	9.01206e-05	169	169
HNRNPR	-0.331196	1.09066e-05	9.11257e-05	169	169
TRPM7	-0.330963	1.10729e-05	9.23563e-05	169	169
PIP5K1P1	-0.330948	1.10832e-05	9.23628e-05	169	168
TCEAL6	-0.330935	1.10926e-05	9.24019e-05	169	164
MAP3K1	-0.330912	1.11095e-05	9.25032e-05	169	169
XBP1	-0.330898	1.11195e-05	9.25466e-05	169	169
PLA2G12A	-0.330813	1.11804e-05	9.30136e-05	169	169
TOP2A	-0.330567	1.13606e-05	9.43764e-05	169	169
SMAD4	-0.330562	1.13636e-05	9.43764e-05	169	169
CMBL	-0.330169	1.16567e-05	9.67274e-05	169	168
BUB1	-0.330089	1.17171e-05	9.71876e-05	169	169
BMP4	-0.33005	1.17463e-05	9.7388e-05	169	125
LOC168474	-0.330006	1.17796e-05	9.76226e-05	169	169
RIF1	-0.329988	1.17938e-05	9.76572e-05	169	169
CENPL	-0.32992	1.18453e-05	9.79998e-05	169	169
WWC2	-0.329888	1.18701e-05	9.81629e-05	169	167
C17orf75	-0.32981	1.19303e-05	9.85355e-05	169	169
DHRS7	-0.329769	1.19618e-05	9.87069e-05	169	169
PPM1A	-0.32966	1.20462e-05	9.92813e-05	169	169
MRPS27	-0.329645	1.20577e-05	9.93342e-05	169	169
TCEAL3	-0.329399	1.22503e-05	0.00010075	169	169
ANGPTL1	-0.329365	1.22778e-05	0.00010087	169	169
AFF2	-0.329361	1.22805e-05	0.00010087	169	169
SRP19	-0.329178	1.2426e-05	0.000101936	169	169
SLCO2A1	-0.329126	1.24677e-05	0.000102235	169	149
SEC62	-0.3291	1.24887e-05	0.000102364	169	169
SLC2A12	-0.328942	1.26168e-05	0.000103323	169	169
STAR	-0.328936	1.26216e-05	0.000103323	169	169
MKKS	-0.328715	1.28019e-05	0.00010471	169	169
CASC2	-0.328692	1.28213e-05	0.000104825	169	169
TBX1	-0.328667	1.28418e-05	0.000104949	169	163
SFRS13B	-0.328638	1.2866e-05	0.000105102	169	169
DEPDC4	-0.328618	1.2882e-05	0.000105163	169	168
MBTD1	-0.328609	1.28898e-05	0.000105163	169	169
ING5	-0.328576	1.29171e-05	0.000105298	169	169
PTPLA	-0.328509	1.2973e-05	0.000105665	169	169
EARS2	-0.328419	1.30482e-05	0.000106188	169	169
CHD1	-0.327973	1.34272e-05	0.000109045	169	169
NSMCE2	-0.327959	1.3439e-05	0.000109095	169	169
SEC24A	-0.327792	1.35839e-05	0.000110088	169	169
AFF4	-0.327735	1.36336e-05	0.000110444	169	169
FBXO28	-0.327641	1.3716e-05	0.000111019	169	169
C12orf23	-0.327617	1.37376e-05	0.000111101	169	169
IRAK1BP1	-0.327437	1.38964e-05	0.000112245	169	169
KIF15	-0.327329	1.39929e-05	0.000112978	169	169
ACTL8	-0.327217	1.40932e-05	0.000113599	169	71
TUBGCP5	-0.327207	1.41025e-05	0.000113627	169	169
TPP2	-0.32717	1.4136e-05	0.00011385	169	169
EXOSC9	-0.327039	1.42545e-05	0.000114614	169	169
CFHR3	-0.326994	1.42962e-05	0.000114902	169	48
MSL2	-0.326977	1.4311e-05	0.000114973	169	169
WHSC1	-0.326847	1.4431e-05	0.000115746	169	169
CHAC2	-0.326694	1.45729e-05	0.000116788	169	169
FASTKD3	-0.326662	1.46022e-05	0.000116974	169	169
SAPS3	-0.326576	1.46827e-05	0.000117568	169	169
TEKT2	-0.32657	1.46884e-05	0.000117568	169	159
CASP3	-0.326559	1.4699e-05	0.000117569	169	169
SFRS1	-0.326544	1.47128e-05	0.000117569	169	169
THNSL1	-0.326506	1.47484e-05	0.000117757	169	169
CCDC70	-0.326378	1.4869e-05	0.00011852	169	19
ORC2L	-0.326373	1.48745e-05	0.00011852	169	169
SNRNP48	-0.326346	1.48994e-05	0.000118655	169	169
C6orf167	-0.326342	1.49037e-05	0.000118655	169	169
NACA	-0.326171	1.50673e-05	0.000119909	169	169
TRIM6	-0.326109	1.5127e-05	0.000120286	169	169
GALK2	-0.326109	1.51271e-05	0.000120286	169	169
SFRP1	-0.325979	1.52522e-05	0.000121132	169	105
NOLC1	-0.32592	1.53096e-05	0.000121489	169	169
SUDS3	-0.325907	1.53223e-05	0.00012154	169	169
BPESC1	-0.325836	1.53922e-05	0.000121995	169	22
C2orf67	-0.325795	1.54325e-05	0.000122264	169	169
ZNF680	-0.325775	1.54517e-05	0.000122363	169	169
ZKSCAN5	-0.325743	1.54837e-05	0.00012252	169	169
AGGF1	-0.325736	1.54907e-05	0.000122526	169	169
BNIP3	-0.325726	1.55004e-05	0.000122553	169	169
UBE2E1	-0.325698	1.55279e-05	0.00012272	169	169
EIF4G2	-0.325553	1.56717e-05	0.000123756	169	169
NAA25	-0.325469	1.57554e-05	0.000124316	169	169
SETD5	-0.325373	1.58519e-05	0.000125026	169	169
RAB23	-0.325357	1.58686e-05	0.000125108	169	168
NOC3L	-0.325279	1.59472e-05	0.000125631	169	169
CASP6	-0.325276	1.59498e-05	0.000125631	169	169
AGBL1	-0.325255	1.59713e-05	0.000125713	169	16
GTF2F2	-0.324927	1.63073e-05	0.000128098	169	169
SAMD11	-0.324895	1.63411e-05	0.000128312	169	167
GNRHR	-0.324873	1.63635e-05	0.000128436	169	169
SLC35D1	-0.324865	1.63724e-05	0.000128454	169	169
LIAS	-0.324846	1.63917e-05	0.000128554	169	169
USH1G	-0.324832	1.64057e-05	0.00012856	169	71
KIF3A	-0.324816	1.64227e-05	0.000128641	169	169
STAMBP	-0.3248	1.64396e-05	0.00012872	169	169
EPB41L5	-0.324751	1.64904e-05	0.000129015	169	169
ZZZ3	-0.324717	1.65267e-05	0.000129248	169	169
CENPE	-0.324671	1.65741e-05	0.000129462	169	169
TMEFF1	-0.324605	1.66439e-05	0.000129954	169	166
MCFD2	-0.324559	1.66923e-05	0.000130249	169	169
CDK8	-0.324543	1.67097e-05	0.000130292	169	169
NR2C1	-0.324507	1.6748e-05	0.000130506	169	169
LRRC59	-0.324445	1.68142e-05	0.000130916	169	169
CYB5A	-0.324399	1.68627e-05	0.000131242	169	169
ADM2	-0.324382	1.68812e-05	0.000131307	169	168
RYR3	-0.324304	1.6965e-05	0.000131721	169	169
SUGT1	-0.324221	1.70534e-05	0.000132355	169	169
ARHGAP11A	-0.324061	1.72277e-05	0.000133547	169	169
CASKIN2	-0.323925	1.73767e-05	0.000134588	169	169
TLK2	-0.323919	1.73828e-05	0.000134588	169	169
NPEPPS	-0.323643	1.76888e-05	0.000136632	169	169
ALDH7A1	-0.32355	1.77926e-05	0.000137324	169	168
ZNF791	-0.323448	1.79077e-05	0.000138003	169	169
C1orf201	-0.323447	1.7909e-05	0.000138003	169	169
UBFD1	-0.323386	1.79783e-05	0.000138423	169	169
SCYL2	-0.32334	1.80303e-05	0.000138718	169	169
HACE1	-0.323317	1.80569e-05	0.000138867	169	169
ZNF708	-0.323078	1.83311e-05	0.000140865	169	169
CARNS1	-0.32304	1.83753e-05	0.000141072	169	169
ZNHIT3	-0.323036	1.83798e-05	0.000141072	169	169
KIAA0586	-0.323025	1.83919e-05	0.000141109	169	169
OCIAD1	-0.322897	1.85412e-05	0.000142198	169	169
NDST3	-0.322818	1.8634e-05	0.000142854	169	135
TULP3	-0.322739	1.87271e-05	0.00014351	169	169
XPO5	-0.322625	1.88615e-05	0.000144483	169	169
RAD50	-0.322615	1.88739e-05	0.000144522	169	169
KIAA0090	-0.322564	1.89344e-05	0.000144927	169	169
ZNF10	-0.32252	1.89867e-05	0.00014527	169	169
DHX29	-0.322513	1.8995e-05	0.000145277	169	169
ZCCHC14	-0.322414	1.91143e-05	0.000146132	169	169
STK3	-0.322389	1.91436e-05	0.000146298	169	169
UTP14A	-0.322326	1.92201e-05	0.000146825	169	169
DNAJC27	-0.322268	1.92898e-05	0.000147255	169	169
TUBD1	-0.322128	1.94612e-05	0.000148492	169	169
NFXL1	-0.322079	1.95201e-05	0.000148883	169	169
ATAD1	-0.322046	1.9561e-05	0.000149136	169	169
TM7SF3	-0.321902	1.97386e-05	0.000150295	169	169
ZNF765	-0.321894	1.97485e-05	0.000150295	169	169
HMGN5	-0.321892	1.97517e-05	0.000150295	169	169
SAR1B	-0.321816	1.98456e-05	0.000150892	169	169
SLC39A9	-0.321786	1.98837e-05	0.000151122	169	169
ISCA1	-0.321651	2.00521e-05	0.000152283	169	169
FSD1L	-0.321587	2.01332e-05	0.000152812	169	169
TRIM16	-0.321502	2.02405e-05	0.000153474	169	169
NASP	-0.321288	2.05137e-05	0.000155411	169	169
ISOC1	-0.321283	2.05199e-05	0.000155411	169	169
FAM119B	-0.321259	2.05516e-05	0.000155543	169	169
DKC1	-0.321054	2.08164e-05	0.00015735	169	169
CYP3A5	-0.32104	2.0835e-05	0.000157429	169	168
RUNX1	-0.321016	2.08668e-05	0.000157608	169	169
ATAD5	-0.320976	2.09188e-05	0.000157939	169	169
MRGPRF	-0.320914	2.10002e-05	0.000158431	169	106
RALBP1	-0.3209	2.10179e-05	0.000158492	169	169
LIN7C	-0.320648	2.13516e-05	0.000160645	169	169
NUF2	-0.320549	2.1485e-05	0.000161586	169	169
RFESD	-0.32047	2.15916e-05	0.000162326	169	169
C3orf64	-0.320454	2.16121e-05	0.000162417	169	169
DENND4A	-0.320438	2.16342e-05	0.00016252	169	169
AK3L1	-0.320147	2.20308e-05	0.000165308	169	169
SLTM	-0.320088	2.21124e-05	0.000165856	169	169
AR	-0.320019	2.22073e-05	0.000166439	169	139
SERF1A	-0.319994	2.22421e-05	0.000166636	169	169
SKA1	-0.319927	2.2335e-05	0.000167267	169	169
FGFR3	-0.319918	2.23474e-05	0.000167296	169	168
CENPH	-0.319866	2.24202e-05	0.000167776	169	169
SERINC5	-0.319858	2.24316e-05	0.000167797	169	169
CENPK	-0.319833	2.24661e-05	0.00016799	169	169
PPAT	-0.319827	2.24757e-05	0.000167997	169	169
HRSP12	-0.319802	2.25099e-05	0.000168188	169	169
MTMR15	-0.319749	2.25851e-05	0.000168685	169	169
VAMP7	-0.319597	2.27994e-05	0.000170089	169	169
RNF6	-0.31959	2.28099e-05	0.000170103	169	169
ZC3H13	-0.319455	2.30025e-05	0.000171473	169	169
C1orf96	-0.319442	2.30202e-05	0.000171539	169	169
SLC16A1	-0.319388	2.30985e-05	0.000172057	169	169
OCLM	-0.319331	2.31807e-05	0.000172603	169	169
PRSS12	-0.319246	2.33026e-05	0.000173378	169	166
TDP1	-0.319219	2.33426e-05	0.000173543	169	169
RAD51C	-0.31909	2.35307e-05	0.000174674	169	169
FBXL3	-0.319075	2.35522e-05	0.000174766	169	169
ZNHIT6	-0.319034	2.36124e-05	0.00017508	169	169
TMEM18	-0.318956	2.37274e-05	0.000175865	169	169
CCNB1	-0.318892	2.3821e-05	0.000176492	169	169
ZCCHC16	-0.318805	2.39499e-05	0.000177325	169	14
UBE2CBP	-0.318804	2.39517e-05	0.000177325	169	169
C5orf44	-0.318792	2.39699e-05	0.000177392	169	169
VASH2	-0.318784	2.3982e-05	0.000177414	169	169
TNRC6C	-0.318726	2.40679e-05	0.000177875	169	169
TMEM194A	-0.318724	2.40718e-05	0.000177875	169	169
ZNF207	-0.318544	2.4342e-05	0.000179598	169	169
ZRANB1	-0.318486	2.44302e-05	0.000180112	169	169
LOH3CR2A	-0.318372	2.46027e-05	0.000181178	169	118
C2orf43	-0.31823	2.48205e-05	0.000182575	169	169
GALNT2	-0.318212	2.48486e-05	0.000182712	169	169
NEDD1	-0.317934	2.52797e-05	0.000185741	169	169
MAPK1IP1L	-0.317799	2.54915e-05	0.000187071	169	169
RALGPS2	-0.317778	2.55243e-05	0.000187163	169	169
ZMYND11	-0.317774	2.55318e-05	0.000187163	169	169
PRAMEF18	-0.317768	2.55407e-05	0.000187163	169	4
MAX	-0.317604	2.58011e-05	0.000188929	169	169
PCSK1	-0.317466	2.60221e-05	0.000190333	169	134
MAP4K5	-0.317387	2.61496e-05	0.000191193	169	169
HYOU1	-0.317152	2.65323e-05	0.000193773	169	169
UBXN2A	-0.317126	2.65745e-05	0.000194008	169	169
GNG4	-0.317102	2.66143e-05	0.000194226	169	143
NUP153	-0.317041	2.67138e-05	0.000194878	169	169
SRP54	-0.316921	2.69123e-05	0.000196179	169	169
NFE2L2	-0.316805	2.71059e-05	0.000197205	169	169
SLC30A9	-0.3168	2.71139e-05	0.000197205	169	169
SH3D19	-0.316746	2.72044e-05	0.000197641	169	169
ANKHD1	-0.316737	2.72201e-05	0.000197682	169	169
FAM188A	-0.316501	2.76184e-05	0.000200349	169	169
PSMD5	-0.316244	2.80589e-05	0.00020309	169	169
ZNF443	-0.316173	2.81815e-05	0.000203826	169	169
KIAA1009	-0.316147	2.82264e-05	0.000204074	169	169
C6orf170	-0.316103	2.83038e-05	0.000204558	169	169
IFT122	-0.316096	2.83153e-05	0.000204565	169	169
PHLDB1	-0.316053	2.83915e-05	0.000205039	169	167
CASD1	-0.315918	2.8627e-05	0.000206433	169	169
DLL3	-0.315678	2.90527e-05	0.000209192	169	106
TNFRSF11B	-0.315663	2.9079e-05	0.000209241	169	113
SCN9A	-0.315656	2.90914e-05	0.000209241	169	163
KIAA0754	-0.315647	2.9109e-05	0.000209287	169	169
LANCL1	-0.31555	2.92822e-05	0.000210455	169	169
RDH14	-0.315508	2.93575e-05	0.000210918	169	169
HELQ	-0.315424	2.95092e-05	0.000211699	169	169
C8orf38	-0.315424	2.95098e-05	0.000211699	169	169
FBXO10	-0.315364	2.96173e-05	0.000212392	169	169
CYP4F11	-0.315285	2.97625e-05	0.000213276	169	128
MEX3A	-0.315262	2.98047e-05	0.000213499	169	169
RACGAP1	-0.315107	3.00882e-05	0.000215293	169	169
ZNF114	-0.315009	3.02696e-05	0.000216431	169	169
DPY19L1	-0.314775	3.07062e-05	0.00021915	169	169
RBM28	-0.314705	3.08395e-05	0.000219939	169	169
CHD7	-0.314612	3.10149e-05	0.000220947	169	169
C13orf38	-0.314558	3.11172e-05	0.000221594	169	167
TRIM37	-0.314523	3.1185e-05	0.000221915	169	169
KLHDC10	-0.314522	3.11851e-05	0.000221915	169	169
YLPM1	-0.314484	3.12587e-05	0.000222276	169	169
OPA1	-0.314441	3.13412e-05	0.000222782	169	169
KIRREL3	-0.314304	3.16048e-05	0.000224	169	169
DOC2B	-0.314287	3.16376e-05	0.000224083	169	101
CERCAM	-0.314286	3.16396e-05	0.000224083	169	169
ARMC10	-0.314218	3.17715e-05	0.000224816	169	169
POF1B	-0.314215	3.17764e-05	0.000224816	169	111
GDF11	-0.314214	3.17778e-05	0.000224816	169	169
ELF1	-0.314122	3.19579e-05	0.000225926	169	169
EPS15	-0.314116	3.19704e-05	0.000225932	169	169
GGT6	-0.314034	3.21305e-05	0.000226734	169	69
RAP2A	-0.314021	3.21562e-05	0.000226833	169	169
ARIH1	-0.313986	3.22235e-05	0.000227225	169	169
GXYLT1	-0.313977	3.22428e-05	0.000227226	169	169
HCG18	-0.313969	3.22587e-05	0.000227226	169	169
DHX40	-0.313896	3.24021e-05	0.00022807	169	169
TEX101	-0.313748	3.26949e-05	0.000229632	169	55
CAV2	-0.313723	3.27462e-05	0.000229868	169	159
FAM126B	-0.313715	3.27614e-05	0.000229868	169	169
NME5	-0.313705	3.27807e-05	0.000229903	169	47
MRPL35	-0.313694	3.2804e-05	0.000229983	169	169
PHYH	-0.313603	3.29858e-05	0.000230925	169	169
C2orf47	-0.313581	3.30297e-05	0.000231065	169	169
STIL	-0.313191	3.38249e-05	0.000236458	169	169
YIPF6	-0.313152	3.39051e-05	0.000236854	169	169
ATP9A	-0.313152	3.39059e-05	0.000236854	169	168
FAM175A	-0.31303	3.41566e-05	0.000238434	169	169
CCNJL	-0.312836	3.45638e-05	0.00024093	169	158
SH3GLB1	-0.312808	3.46215e-05	0.000241159	169	169
UBE3A	-0.312732	3.47819e-05	0.000242013	169	169
ZNF684	-0.312726	3.47939e-05	0.000242013	169	169
MLANA	-0.312708	3.48324e-05	0.000242194	169	169
GKAP1	-0.312645	3.4966e-05	0.000242949	169	169
SPATA5	-0.312628	3.50032e-05	0.000243045	169	169
EPC2	-0.312591	3.50809e-05	0.000243486	169	169
FAM108B1	-0.312519	3.52351e-05	0.000244469	169	169
CDC42SE2	-0.312477	3.53245e-05	0.000244915	169	169
LASS6	-0.312468	3.53435e-05	0.000244959	169	169
PLK1S1	-0.31245	3.5384e-05	0.000245153	169	169
LOC100192378	-0.312388	3.55157e-05	0.000245889	169	17
ISPD	-0.3123	3.57071e-05	0.000247038	169	169
CSTF2T	-0.312271	3.57696e-05	0.000247276	169	169
TCEAL4	-0.312266	3.57795e-05	0.000247276	169	169
PLCH1	-0.312181	3.59654e-05	0.000248472	169	163
PAPOLB	-0.31217	3.599e-05	0.000248554	169	101
HYLS1	-0.312108	3.61243e-05	0.000249392	169	169
PMP22	-0.31204	3.62747e-05	0.000250253	169	163
ZNF69	-0.311866	3.66591e-05	0.000252636	169	169
ARL5B	-0.311854	3.66845e-05	0.000252675	169	169
TCEB1	-0.311839	3.67196e-05	0.000252675	169	169
FAM59A	-0.311837	3.67223e-05	0.000252675	169	129
TNNI3	-0.311821	3.67597e-05	0.000252791	169	67
TIMM9	-0.311765	3.68846e-05	0.00025356	169	169
ZNF433	-0.311615	3.72195e-05	0.000255501	169	169
AP1AR	-0.311607	3.72372e-05	0.000255533	169	169
TWISTNB	-0.31147	3.75488e-05	0.00025758	169	169
WDR78	-0.31144	3.76172e-05	0.000257867	169	165
FAM136A	-0.311351	3.78207e-05	0.000259171	169	169
NOL7	-0.311329	3.78705e-05	0.000259421	169	169
EPB41L4A	-0.311309	3.7916e-05	0.000259641	169	169
FANCM	-0.31118	3.82128e-05	0.000261489	169	169
WAPAL	-0.31111	3.83752e-05	0.000262415	169	169
FRMD6	-0.311097	3.84037e-05	0.000262518	169	161
RBAK	-0.311086	3.84306e-05	0.000262609	169	169
DCUN1D3	-0.310727	3.92723e-05	0.00026789	169	169
RASL11B	-0.310698	3.9341e-05	0.000268264	169	166
CTPS2	-0.310563	3.9662e-05	0.000270264	169	169
PAIP1	-0.310532	3.97372e-05	0.000270586	169	169
KCTD3	-0.310196	4.05502e-05	0.000275832	169	169
FUT8	-0.310189	4.05669e-05	0.000275849	169	169
TMEM165	-0.310156	4.06481e-05	0.000276208	169	169
DNAJB9	-0.309763	4.16201e-05	0.000282418	169	169
EPM2AIP1	-0.309669	4.18554e-05	0.000283915	169	169
CSNK1A1	-0.309512	4.22525e-05	0.000286409	169	169
P4HB	-0.309466	4.23708e-05	0.000287011	169	169
KIF20A	-0.309366	4.26251e-05	0.000288432	169	169
MTHFD1L	-0.309249	4.29248e-05	0.000290257	169	169
HEPH	-0.309169	4.31333e-05	0.000291566	169	133
C1orf77	-0.309092	4.33306e-05	0.000292595	169	169
NDUFB6	-0.309048	4.34468e-05	0.000293277	169	169
SKA3	-0.308845	4.39795e-05	0.000296667	169	169
SLC35B4	-0.30873	4.42823e-05	0.000298502	169	169
RAB5B	-0.308718	4.43138e-05	0.000298611	169	169
C19orf21	-0.308627	4.45555e-05	0.000300136	169	81
C1QL2	-0.3086	4.4628e-05	0.000300489	169	9
FAM173B	-0.308584	4.46703e-05	0.000300597	169	169
ECM2	-0.308508	4.4874e-05	0.000301863	169	169
ATXN10	-0.308424	4.5101e-05	0.00030318	169	169
EPCAM	-0.308393	4.51846e-05	0.000303427	169	153
TSPAN3	-0.308382	4.52138e-05	0.000303518	169	169
KIF11	-0.308365	4.526e-05	0.000303723	169	169
ANKRD28	-0.308314	4.53986e-05	0.000304443	169	169
C12orf73	-0.30805	4.6122e-05	0.000309081	169	169
CDH12	-0.308	4.62584e-05	0.000309675	169	169
RDX	-0.307992	4.62824e-05	0.000309694	169	169
HGF	-0.307988	4.62932e-05	0.000309694	169	169
NUP160	-0.3079	4.65376e-05	0.000311222	169	169
MUDENG	-0.307839	4.67063e-05	0.000312243	169	169
FAM104B	-0.307805	4.68024e-05	0.000312778	169	169
NUDT10	-0.307721	4.70361e-05	0.000314231	169	121
NDUFV2	-0.307675	4.71658e-05	0.00031499	169	169
ATG5	-0.307589	4.74085e-05	0.000316393	169	169
C15orf5	-0.307578	4.74388e-05	0.000316486	169	169
CDCA7L	-0.307506	4.76448e-05	0.000317752	169	169
TARDBP	-0.30748	4.77182e-05	0.000318132	169	169
COQ5	-0.307443	4.78245e-05	0.000318704	169	169
GRLF1	-0.307438	4.78368e-05	0.000318704	169	169
DARS2	-0.307419	4.78909e-05	0.000318956	169	169
VPS26A	-0.307373	4.80231e-05	0.000319684	169	169
KCTD1	-0.307335	4.81322e-05	0.000320124	169	169
FAM60A	-0.307289	4.82638e-05	0.000320889	169	169
POLE2	-0.307254	4.83659e-05	0.000321458	169	169
RASGRF1	-0.307169	4.86101e-05	0.00032286	169	167
PSMD11	-0.30706	4.89267e-05	0.000324557	169	169
APITD1	-0.307059	4.89289e-05	0.000324557	169	169
AQP4	-0.307056	4.89386e-05	0.000324557	169	99
PVT1	-0.307052	4.89491e-05	0.000324557	169	169
MRPL27	-0.30667	5.00764e-05	0.000331128	169	169
DHFR	-0.306471	5.06704e-05	0.000334942	169	169
PRDX6	-0.306093	5.18221e-05	0.000341741	169	169
CHD9	-0.306045	5.19712e-05	0.000342608	169	169
C4orf21	-0.306039	5.19897e-05	0.000342614	169	169
ORC3L	-0.305979	5.21741e-05	0.000343596	169	169
SS18L1	-0.305954	5.2251e-05	0.000343986	169	169
CHD6	-0.305929	5.23274e-05	0.000344372	169	169
MTCH2	-0.305702	5.3039e-05	0.000348573	169	169
CORO2B	-0.305689	5.30773e-05	0.000348599	169	166
DHX9	-0.305642	5.3225e-05	0.000349451	169	169
PRRG1	-0.305472	5.37653e-05	0.000352522	169	136
DCAF16	-0.305432	5.38923e-05	0.000352997	169	169
CDR2	-0.305423	5.39208e-05	0.000353065	169	169
SHQ1	-0.30541	5.39641e-05	0.000353111	169	169
GTF2A2	-0.305388	5.40318e-05	0.000353435	169	169
HRH4	-0.305377	5.40676e-05	0.00035355	169	165
AMACR	-0.305371	5.40881e-05	0.000353565	169	169
CHST10	-0.305307	5.42928e-05	0.000354784	169	169
C1orf9	-0.305254	5.44643e-05	0.000355785	169	169
SLMAP	-0.305082	5.50186e-05	0.000359044	169	169
TMED10	-0.305042	5.51495e-05	0.000359777	169	169
ANKRD32	-0.304967	5.53964e-05	0.000361024	169	169
TRIM16L	-0.304935	5.54998e-05	0.000361577	169	169
SLC39A10	-0.304824	5.58651e-05	0.000363591	169	169
ECSCR	-0.304753	5.60993e-05	0.000364974	169	113
C14orf166	-0.304743	5.6134e-05	0.000364974	169	169
ORMDL3	-0.304597	5.66209e-05	0.000367894	169	169
COPB2	-0.304533	5.68349e-05	0.000369038	169	169
SENP2	-0.304525	5.68598e-05	0.000369076	169	169
C9orf41	-0.30441	5.72458e-05	0.000371086	169	169
POLR1B	-0.304315	5.75688e-05	0.000372682	169	169
ZNF221	-0.304263	5.7747e-05	0.000373711	169	169
ECT2L	-0.304254	5.77775e-05	0.000373785	169	169
OCRL	-0.304245	5.78082e-05	0.000373859	169	169
C6orf162	-0.304151	5.81274e-05	0.000375423	169	169
CPA4	-0.304145	5.81503e-05	0.000375446	169	28
ZNF14	-0.304132	5.81921e-05	0.000375591	169	169
CENPI	-0.304095	5.83219e-05	0.000376304	169	169
APH1B	-0.30407	5.84078e-05	0.000376733	169	169
BLM	-0.304024	5.8566e-05	0.000377628	169	169
PDSS2	-0.304006	5.86261e-05	0.000377891	169	169
TMF1	-0.303951	5.88176e-05	0.000378999	169	169
C17orf76	-0.303882	5.90579e-05	0.000380412	169	169
DNAJC24	-0.303876	5.90761e-05	0.000380412	169	169
GPR161	-0.303864	5.91178e-05	0.000380555	169	168
OXNAD1	-0.303763	5.94726e-05	0.000382712	169	169
RDH10	-0.303738	5.95577e-05	0.000383133	169	169
TBCA	-0.303705	5.96738e-05	0.000383753	169	169
CTSC	-0.303644	5.98906e-05	0.00038502	169	169
AP3S1	-0.303549	6.02258e-05	0.000387047	169	169
CLNS1A	-0.303504	6.03849e-05	0.000387812	169	169
ZNF518A	-0.30341	6.07184e-05	0.000389568	169	169
GGNBP2	-0.303379	6.08279e-05	0.000390142	169	169
SNIP1	-0.303361	6.08949e-05	0.000390325	169	169
ARV1	-0.303351	6.09288e-05	0.000390402	169	169
NSA2	-0.303339	6.09727e-05	0.000390555	169	169
CREM	-0.303246	6.13084e-05	0.000392446	169	169
GPT2	-0.303087	6.18821e-05	0.000395858	169	169
FNTA	-0.303063	6.19681e-05	0.000396147	169	169
GABPA	-0.303029	6.20918e-05	0.000396808	169	169
FAM18B	-0.303008	6.21684e-05	0.000397167	169	169
ZSCAN12P1	-0.302863	6.26992e-05	0.000400163	169	169
NCAPG	-0.302814	6.28805e-05	0.000401189	169	169
HINT3	-0.30274	6.31527e-05	0.000402547	169	169
JARID2	-0.302596	6.36911e-05	0.000405694	169	169
MEX3C	-0.302572	6.37796e-05	0.000406125	169	169
TRIM36	-0.302558	6.38298e-05	0.000406311	169	163
FAM122B	-0.302453	6.42256e-05	0.000408563	169	169
MTUS2	-0.302358	6.4585e-05	0.000410715	169	168
ERI1	-0.302279	6.48845e-05	0.000412215	169	169
ST5	-0.302202	6.51769e-05	0.000413633	169	169
ADCY1	-0.302085	6.56246e-05	0.000416236	169	168
PDIA4	-0.302051	6.57542e-05	0.000416786	169	169
WDR3	-0.302003	6.59385e-05	0.000417818	169	169
EXOC3L2	-0.301827	6.66216e-05	0.000421871	169	167
GNAQ	-0.301821	6.66433e-05	0.000421871	169	169
APLF	-0.301807	6.66979e-05	0.00042208	169	169
NUPL1	-0.30174	6.6961e-05	0.000423331	169	169
CCDC90A	-0.301698	6.71235e-05	0.000424221	169	169
BRAP	-0.301654	6.72992e-05	0.000425192	169	169
PLD6	-0.301508	6.7874e-05	0.000428546	169	169
USP54	-0.301403	6.82917e-05	0.000430484	169	169
APPBP2	-0.30138	6.83808e-05	0.000430906	169	169
ZNF431	-0.301355	6.84815e-05	0.0004314	169	169
FAM82B	-0.301148	6.93128e-05	0.000435789	169	169
POT1	-0.301138	6.93536e-05	0.000435799	169	169
FZD7	-0.301137	6.93591e-05	0.000435799	169	169
MANF	-0.301105	6.94881e-05	0.000436468	169	169
TNKS	-0.301096	6.95232e-05	0.000436547	169	169
SPDYE8P	-0.300933	7.01884e-05	0.000440439	169	169
CASC5	-0.30085	7.05263e-05	0.000442417	169	169
DNAJB7	-0.300739	7.09847e-05	0.000445005	169	169
FAM190B	-0.300697	7.11569e-05	0.000445941	169	169
ZNF16	-0.300648	7.13607e-05	0.000446786	169	169
SIM1	-0.3006	7.15609e-05	0.000447895	169	25
TNPO3	-0.300537	7.18222e-05	0.000449386	169	169
UXS1	-0.300478	7.20691e-05	0.000450496	169	169
SUMO2	-0.300465	7.21245e-05	0.000450573	169	169
TTC30B	-0.300464	7.21306e-05	0.000450573	169	169
ZNF770	-0.300414	7.23374e-05	0.000451591	169	169
BCL6B	-0.300282	7.28953e-05	0.000454623	169	152
BTF3	-0.300277	7.29194e-05	0.000454623	169	169
LHFP	-0.300189	7.32928e-05	0.00045653	169	168
C1orf212	0.300135	7.35229e-05	0.000457816	169	169
PATL1	0.300193	7.32725e-05	0.00045653	169	169
PTPRC	0.300272	7.29398e-05	0.000454623	169	169
RAB11B	0.300324	7.27189e-05	0.000453682	169	169
MYBPH	0.300374	7.25077e-05	0.000452509	169	106
PRDX5	0.300459	7.2151e-05	0.000450573	169	169
TNFRSF11A	0.300499	7.19837e-05	0.000450107	169	159
ZRSR2	0.300515	7.19154e-05	0.000449824	169	169
SYTL3	0.300674	7.12518e-05	0.000446248	169	169
F8A1	0.300686	7.12053e-05	0.000446101	169	169
AP3D1	0.300748	7.0949e-05	0.000444925	169	169
LPPR2	0.301033	6.9778e-05	0.000438006	169	169
SLC4A2	0.301179	6.91882e-05	0.000435147	169	169
ENGASE	0.301187	6.91563e-05	0.000435087	169	169
ELMOD3	0.3012	6.91041e-05	0.000434899	169	169
CXCR2	0.301219	6.90279e-05	0.00043456	169	167
DAPK3	0.301262	6.88529e-05	0.000433599	169	169
C19orf20	0.301413	6.82523e-05	0.000430375	169	169
MARCO	0.301434	6.81655e-05	0.000429967	169	135
TACC3	0.301477	6.79981e-05	0.00042905	169	169
SDHA	0.301479	6.79891e-05	0.00042905	169	169
PRLR	0.301629	6.7397e-05	0.000425672	169	145
DAXX	0.301751	6.69171e-05	0.000423191	169	169
TSPAN14	0.301785	6.67832e-05	0.000422482	169	169
C19orf24	0.301947	6.61542e-05	0.000419048	169	169
HIST1H4J	0.302073	6.56704e-05	0.000416391	169	163
VPS16	0.302198	6.51928e-05	0.000413633	169	169
FOLR2	0.302246	6.50084e-05	0.000412732	169	160
AK1	0.302253	6.49805e-05	0.00041269	169	169
FAM160A2	0.302308	6.47744e-05	0.00041165	169	169
RASA4P	0.302342	6.46438e-05	0.000410954	169	169
ODF3B	0.302497	6.40593e-05	0.000407638	169	166
LPAL2	0.302674	6.33979e-05	0.000403959	169	161
CMTM4	0.30274	6.31556e-05	0.000402547	169	169
GLI4	0.302806	6.29117e-05	0.000401255	169	169
SOLH	0.302942	6.24102e-05	0.000398449	169	169
RAD9B	0.302991	6.22298e-05	0.000397428	169	169
KIAA0415	0.303064	6.19637e-05	0.000396147	169	169
UNKL	0.303216	6.14162e-05	0.000393007	169	169
GPR133	0.303302	6.11064e-05	0.000391282	169	155
TAGLN2	0.30336	6.08967e-05	0.000390325	169	169
LRDD	0.303438	6.06176e-05	0.00038905	169	169
CD22	0.303479	6.04745e-05	0.000388259	169	169
AXIN1	0.303504	6.03828e-05	0.000387812	169	169
HOXA3	0.304167	5.80742e-05	0.000375204	169	161
LY86	0.304172	5.80552e-05	0.000375204	169	169
C15orf62	0.304196	5.79759e-05	0.000374818	169	169
HLA-DOA	0.304329	5.75229e-05	0.000372509	169	169
RAB1B	0.304364	5.74038e-05	0.000371862	169	169
AUP1	0.304374	5.73688e-05	0.000371759	169	169
MPG	0.304425	5.71974e-05	0.000370895	169	169
ATXN7L3	0.304464	5.70641e-05	0.000370155	169	169
FLCN	0.304485	5.69959e-05	0.000369836	169	169
GGTLC2	0.30456	5.6744e-05	0.000368571	169	162
MED16	0.304626	5.65234e-05	0.000367383	169	169
P2RX4	0.304746	5.61238e-05	0.000364974	169	169
C15orf17	0.304874	5.57009e-05	0.000362644	169	169
ARFGAP2	0.304903	5.56048e-05	0.000362139	169	169
ATF6B	0.304977	5.53612e-05	0.000360916	169	169
TNFRSF1A	0.305008	5.52618e-05	0.000360389	169	169
SIRPA	0.305216	5.45872e-05	0.000356348	169	169
KIAA2013	0.305222	5.45667e-05	0.000356334	169	169
FAM109A	0.305417	5.39405e-05	0.000353075	169	169
ALKBH6	0.305437	5.38771e-05	0.000352997	169	169
CD4	0.305452	5.38284e-05	0.000352816	169	169
CSF1R	0.305488	5.37149e-05	0.00035231	169	169
GBA	0.305541	5.35462e-05	0.000351322	169	169
LILRB5	0.30562	5.32968e-05	0.000349804	169	163
FAM82A1	0.305696	5.30554e-05	0.000348573	169	165
SMAD3	0.305772	5.28169e-05	0.00034724	169	169
MEGF9	0.305803	5.27208e-05	0.000346726	169	169
SEPT1	0.305858	5.25498e-05	0.000345718	169	169
GAS7	0.306	5.21075e-05	0.000343273	169	169
IL1RN	0.306101	5.17984e-05	0.000341701	169	168
CEACAM4	0.306103	5.17927e-05	0.000341701	169	169
GPR137	0.306271	5.12772e-05	0.000338492	169	169
NPFF	0.306275	5.12653e-05	0.000338492	169	169
WASH7P	0.306415	5.08416e-05	0.000335845	169	169
KIAA0892	0.306449	5.07384e-05	0.000335277	169	169
SLC37A1	0.306739	4.98704e-05	0.000329878	169	169
RABAC1	0.306804	4.9677e-05	0.00032871	169	169
FKBP8	0.306858	4.95196e-05	0.000327781	169	169
TOM1	0.306887	4.94325e-05	0.000327316	169	169
CDK10	0.306935	4.92921e-05	0.000326497	169	169
CRTAM	0.306955	4.92353e-05	0.000326232	169	168
PI4KA	0.30698	4.91613e-05	0.000325853	169	169
AAMP	0.307094	4.88286e-05	0.000324201	169	169
UBE2R2	0.307194	4.85395e-05	0.000322502	169	169
MN1	0.307363	4.80519e-05	0.000319699	169	169
TRAF1	0.307369	4.80333e-05	0.000319684	169	169
SAMHD1	0.307603	4.73703e-05	0.000316246	169	169
B3GAT3	0.308018	4.62109e-05	0.000309464	169	169
LIMK2	0.30803	4.61773e-05	0.000309345	169	169
IL16	0.308212	4.5676e-05	0.000306198	169	169
RPUSD1	0.308343	4.53211e-05	0.000304029	169	169
MEF2C	0.308407	4.51459e-05	0.000303272	169	169
PLEKHA2	0.308418	4.51183e-05	0.000303191	169	169
KCNE1	0.308443	4.50511e-05	0.000302949	169	167
IFI6	0.308596	4.46389e-05	0.000300489	169	169
C2orf62	0.308827	4.40253e-05	0.000296873	169	122
HCP5	0.308928	4.37594e-05	0.000295285	169	169
TKT	0.30912	4.32583e-05	0.000292207	169	169
TRIM26	0.309144	4.31981e-05	0.000291903	169	169
MED11	0.309356	4.26495e-05	0.000288496	169	169
TMBIM1	0.309379	4.2591e-05	0.000288302	169	169
CCM2	0.309391	4.25622e-05	0.000288207	169	169
INHBA	0.309476	4.23453e-05	0.000286938	169	149
PSME1	0.309587	4.20631e-05	0.000285225	169	169
RNF145	0.309775	4.15907e-05	0.000282317	169	169
ADD1	0.309806	4.1514e-05	0.000281895	169	169
TMEM109	0.309961	4.11279e-05	0.000279371	169	169
RNF144B	0.310174	4.0604e-05	0.000276005	169	169
TAOK2	0.310198	4.05447e-05	0.000275832	169	169
PTPN18	0.310378	4.01083e-05	0.000273017	169	169
SULF2	0.310536	3.97281e-05	0.000270586	169	169
FCGR1B	0.310569	3.96489e-05	0.000270264	169	169
LSM4	0.310818	3.90572e-05	0.000266516	169	169
LOC389634	0.310842	3.90017e-05	0.00026623	169	163
TNFAIP8L2	0.310981	3.86736e-05	0.000264084	169	169
TLE3	0.311033	3.85535e-05	0.000263356	169	169
OASL	0.311112	3.83702e-05	0.000262415	169	168
NAGPA	0.311275	3.79936e-05	0.00026008	169	169
FLT3LG	0.311442	3.76131e-05	0.000257867	169	169
C17orf55	0.311621	3.72065e-05	0.000255501	169	150
SFI1	0.311631	3.7185e-05	0.000255445	169	169
ATP13A1	0.311722	3.698e-05	0.000254126	169	169
SSNA1	0.311834	3.67298e-05	0.000252675	169	169
PLB1	0.311839	3.67187e-05	0.000252675	169	169
CCDC124	0.311877	3.66348e-05	0.000252558	169	169
H2AFY2	0.311942	3.64913e-05	0.000251658	169	155
PPP2R5B	0.312075	3.61975e-05	0.000249809	169	169
GLT1D1	0.312275	3.57611e-05	0.000247276	169	158
MAS1	0.312304	3.56982e-05	0.000247038	169	96
TTC22	0.312443	3.53983e-05	0.000245164	169	162
SLC12A7	0.312481	3.53163e-05	0.000244915	169	169
PAOX	0.312627	3.50048e-05	0.000243045	169	169
FCGR1C	0.312651	3.49539e-05	0.000242949	169	168
GPR108	0.312756	3.47314e-05	0.000241752	169	169
USP3	0.312794	3.46521e-05	0.000241286	169	169
TPD52L2	0.312823	3.45897e-05	0.000241024	169	169
XPO6	0.312933	3.43588e-05	0.000239587	169	169
PSMF1	0.312973	3.42771e-05	0.000239103	169	169
DDTL	0.312997	3.42268e-05	0.000238838	169	169
AGER	0.313037	3.41421e-05	0.000238418	169	169
FCGR2C	0.313471	3.32531e-05	0.000232544	169	168
ZDHHC12	0.313597	3.29982e-05	0.000230928	169	169
DCAF15	0.313604	3.29839e-05	0.000230925	169	169
CSF2RB	0.313619	3.29536e-05	0.000230865	169	169
PRR13	0.313624	3.2943e-05	0.000230865	169	169
TRIM34	0.313714	3.27639e-05	0.000229868	169	169
THOC6	0.313768	3.26564e-05	0.000229445	169	169
PRSS53	0.313775	3.26426e-05	0.000229431	169	169
FAM173A	0.313813	3.25656e-05	0.000228973	169	169
ZNF787	0.313814	3.2564e-05	0.000228973	169	169
GRPR	0.313852	3.24897e-05	0.000228604	169	157
CDC42EP1	0.313959	3.22774e-05	0.000227275	169	168
PARP9	0.313969	3.22569e-05	0.000227226	169	169
LILRA3	0.314082	3.20364e-05	0.000226151	169	153
GUK1	0.314082	3.20363e-05	0.000226151	169	169
REM2	0.314106	3.19889e-05	0.000225981	169	169
SLC2A5	0.314175	3.18552e-05	0.000225281	169	169
HCG26	0.314342	3.15302e-05	0.000223553	169	168
EZH1	0.314348	3.15202e-05	0.000223553	169	169
RNF112	0.314364	3.14886e-05	0.000223421	169	132
C1orf86	0.314378	3.14618e-05	0.000223312	169	169
CLTB	0.314413	3.13938e-05	0.000222911	169	169
SIN3B	0.314417	3.13866e-05	0.000222911	169	169
SDR39U1	0.314422	3.13772e-05	0.000222911	169	169
FGL2	0.314488	3.12512e-05	0.000222276	169	169
TBC1D1	0.314635	3.09721e-05	0.000220723	169	169
TIFAB	0.314675	3.08954e-05	0.000220257	169	152
MEI1	0.314723	3.08055e-05	0.000219778	169	169
GLIPR2	0.314825	3.06127e-05	0.000218562	169	169
MEFV	0.314843	3.05788e-05	0.000218401	169	166
FLAD1	0.314847	3.05719e-05	0.000218401	169	169
TLR5	0.314896	3.04806e-05	0.000217859	169	168
IMPDH1	0.315021	3.02485e-05	0.00021636	169	169
ABCC10	0.315146	3.00178e-05	0.000214867	169	169
RERE	0.315188	2.99402e-05	0.000214391	169	169
INPP5D	0.315312	2.97135e-05	0.000213004	169	169
LIPN	0.31543	2.9498e-05	0.000211699	169	139
IFITM2	0.31549	2.93898e-05	0.000211072	169	169
TMEM88	0.315656	2.90918e-05	0.000209241	169	169
ASCC2	0.315686	2.90379e-05	0.000209163	169	169
PTTG2	0.315733	2.89544e-05	0.000208639	169	163
FTL	0.315837	2.87705e-05	0.000207391	169	169
PPFIBP2	0.315974	2.85286e-05	0.0002058	169	169
TRMT2A	0.315987	2.85064e-05	0.000205716	169	169
TMEM55B	0.315995	2.84915e-05	0.000205685	169	169
ZNF384	0.316204	2.81285e-05	0.000203518	169	169
BMF	0.316303	2.79582e-05	0.000202437	169	169
GPR65	0.31635	2.78772e-05	0.000201925	169	169
LOC115110	0.316435	2.77305e-05	0.000200937	169	169
IQSEC1	0.316462	2.76859e-05	0.000200689	169	169
CBLN3	0.316468	2.76758e-05	0.000200689	169	169
SMCR8	0.316571	2.74997e-05	0.000199563	169	169
BAT5	0.316593	2.74621e-05	0.000199365	169	169
PTP4A3	0.316775	2.71569e-05	0.00019737	169	169
SMAP2	0.316785	2.71398e-05	0.000197319	169	169
GNB2	0.316808	2.7101e-05	0.000197205	169	169
KCTD5	0.316839	2.70489e-05	0.000196954	169	169
SAT1	0.316887	2.69698e-05	0.000196451	169	169
NCKAP1L	0.316903	2.69427e-05	0.000196327	169	169
UCK1	0.316973	2.68266e-05	0.000195628	169	169
ACOX2	0.317199	2.64553e-05	0.000193283	169	132
PLCG2	0.317332	2.62387e-05	0.000191772	169	169
FUT7	0.317509	2.59525e-05	0.000189895	169	169
ZMAT5	0.317587	2.58286e-05	0.00018906	169	169
CARKD	0.317754	2.55634e-05	0.00018726	169	169
PPIL2	0.317794	2.54992e-05	0.000187071	169	169
C6orf47	0.317831	2.54408e-05	0.000186784	169	169
FAM50A	0.317847	2.54158e-05	0.00018667	169	169
CTDSP2	0.317982	2.52049e-05	0.000185262	169	169
SH3BP5L	0.318241	2.48028e-05	0.000182513	169	169
UQCR11	0.318349	2.46377e-05	0.000181367	169	169
GGT1	0.318388	2.4578e-05	0.000181065	169	169
TMEM173	0.318469	2.44545e-05	0.000180223	169	169
OSGIN1	0.318528	2.43651e-05	0.000179701	169	165
GSN	0.318567	2.43069e-05	0.000179408	169	169
ACAP3	0.318631	2.42105e-05	0.000178764	169	169
TMEM132A	0.318708	2.40957e-05	0.000177984	169	164
PTGER4	0.318753	2.40276e-05	0.000177683	169	169
MS4A4A	0.319052	2.35856e-05	0.000174947	169	167
TLR1	0.319117	2.349e-05	0.000174438	169	169
D2HGDH	0.319148	2.34459e-05	0.000174177	169	169
PILRA	0.319193	2.33797e-05	0.000173752	169	169
RARA	0.319229	2.33275e-05	0.000173497	169	169
VAC14	0.319303	2.32202e-05	0.000172831	169	169
NMRAL1	0.319693	2.26629e-05	0.000169136	169	169
WDR45	0.319719	2.26273e-05	0.000168935	169	169
FRS3	0.320071	2.21357e-05	0.000165967	169	169
TK2	0.320196	2.19631e-05	0.000164863	169	169
PITPNC1	0.320421	2.16574e-05	0.000162631	169	169
UBL7	0.320668	2.13256e-05	0.000160512	169	169
NUBP1	0.3207	2.12828e-05	0.000160252	169	169
EME2	0.320791	2.11622e-05	0.000159406	169	169
ASGR2	0.320848	2.10867e-05	0.000158899	169	156
KYNU	0.320895	2.10247e-05	0.000158492	169	168
NKG7	0.320928	2.09816e-05	0.000158352	169	169
CBX7	0.321111	2.0743e-05	0.000156856	169	169
INPP1	0.321171	2.06643e-05	0.000156321	169	169
SLC4A8	0.321257	2.05533e-05	0.000155543	169	169
RGS2	0.321442	2.03169e-05	0.000153993	169	169
MAP1S	0.321514	2.02248e-05	0.000153415	169	169
ZNF688	0.321583	2.01375e-05	0.000152812	169	169
LGALS1	0.32175	1.9928e-05	0.0001514	169	169
PLEKHN1	0.321851	1.98028e-05	0.000150625	169	151
PTPN7	0.321903	1.97377e-05	0.000150295	169	169
CDC37	0.32203	1.95803e-05	0.000149225	169	169
STUB1	0.322267	1.92915e-05	0.000147255	169	169
HLA-H	0.323055	1.83574e-05	0.000141011	169	169
FKBP15	0.323137	1.82625e-05	0.000140393	169	169
NRN1L	0.32338	1.79849e-05	0.000138423	169	150
PRELID1	0.323415	1.79456e-05	0.000138231	169	169
CDCP1	0.32352	1.78266e-05	0.000137477	169	169
ZBP1	0.323539	1.78057e-05	0.000137371	169	169
PIK3IP1	0.323579	1.77609e-05	0.000137134	169	169
IL27	0.32368	1.76476e-05	0.000136367	169	140
ULK3	0.323746	1.75741e-05	0.000135853	169	169
TRAPPC5	0.32375	1.75694e-05	0.000135853	169	169
RCN3	0.323759	1.75596e-05	0.000135849	169	167
IRF8	0.32379	1.75248e-05	0.000135634	169	169
C6orf129	0.323944	1.73549e-05	0.00013448	169	169
DKFZP686I15217	0.324101	1.71841e-05	0.000133263	169	169
CLCN6	0.324112	1.71724e-05	0.000133225	169	169
LTBR	0.324313	1.69547e-05	0.000131693	169	169
MUS81	0.324352	1.69128e-05	0.000131421	169	169
RBM47	0.32437	1.68943e-05	0.00013133	169	169
ADD3	0.324379	1.68846e-05	0.000131307	169	169
CSAD	0.324475	1.67823e-05	0.00013072	169	169
CCDC157	0.324539	1.67138e-05	0.000130292	169	169
EHD1	0.324557	1.6695e-05	0.000130249	169	169
ADCK4	0.324686	1.65587e-05	0.000129393	169	169
ALDH3B2	0.324691	1.65536e-05	0.000129393	169	154
RGS10	0.324794	1.6446e-05	0.00012872	169	169
ACY3	0.324839	1.63991e-05	0.00012856	169	165
LOC100133161	0.324931	1.63035e-05	0.000128098	169	169
TBC1D10A	0.325088	1.61421e-05	0.000126904	169	169
CD7	0.325178	1.60502e-05	0.000126232	169	169
TTLL3	0.325196	1.60314e-05	0.000126135	169	169
C16orf79	0.325272	1.59543e-05	0.000125631	169	169
YIPF3	0.3255	1.57247e-05	0.000124124	169	169
F5	0.325622	1.56035e-05	0.000123268	169	168
BTN2A2	0.325769	1.54575e-05	0.000122363	169	169
DNMBP	0.325881	1.53482e-05	0.000121696	169	169
CD79B	0.325961	1.52699e-05	0.000121223	169	169
TRPS1	0.326027	1.52055e-05	0.000120811	169	169
KLF13	0.326049	1.51845e-05	0.000120693	169	169
PCSK5	0.326434	1.48164e-05	0.000118154	169	163
IL15RA	0.326445	1.48058e-05	0.000118119	169	169
S100A6	0.326486	1.47671e-05	0.000117858	169	169
CACNB1	0.32651	1.47449e-05	0.000117757	169	169
CFP	0.326545	1.47115e-05	0.000117569	169	169
PRKACA	0.326546	1.47111e-05	0.000117569	169	169
PPCDC	0.32677	1.45016e-05	0.000116264	169	169
GTF3C5	0.326896	1.4386e-05	0.000115433	169	169
FAM49A	0.326919	1.43645e-05	0.000115308	169	169
OR52K2	0.326956	1.43304e-05	0.000115081	169	152
C19orf71	0.327078	1.42192e-05	0.000114378	169	169
OLR1	0.327095	1.42037e-05	0.0001143	169	162
ARSA	0.32716	1.41446e-05	0.000113871	169	169
PLCL2	0.327247	1.40669e-05	0.000113434	169	169
SLC16A13	0.327251	1.40632e-05	0.000113434	169	169
TRAFD1	0.327308	1.40113e-05	0.00011308	169	169
GUCY2C	0.327478	1.38599e-05	0.000111997	169	102
DNAJB12	0.327583	1.37667e-05	0.00011129	169	169
CCL5	0.327632	1.37237e-05	0.000111035	169	169
C7orf50	0.327671	1.36901e-05	0.000110855	169	169
RTN2	0.327831	1.35499e-05	0.000109858	169	169
[truncated: 1,123 more rows]
